# Supplementary material for: Comprehensive Molecular Analysis Identified an SRSF Family-Based Score for Prognosis and Therapy Efficiency Prediction in Hepatocellular Carcinoma
Source: MDPI journal article supplement (doi:10.3390/cancers14194727), 2022-09-28
Supplement: s1 [file s1]

# Comprehensive Molecular Analysis Identified an SRSF Family-Based Score for Prognosis and Therapy Efficiency Prediction in Hepatocellular Carcinoma

## 1. Supplementary Figures

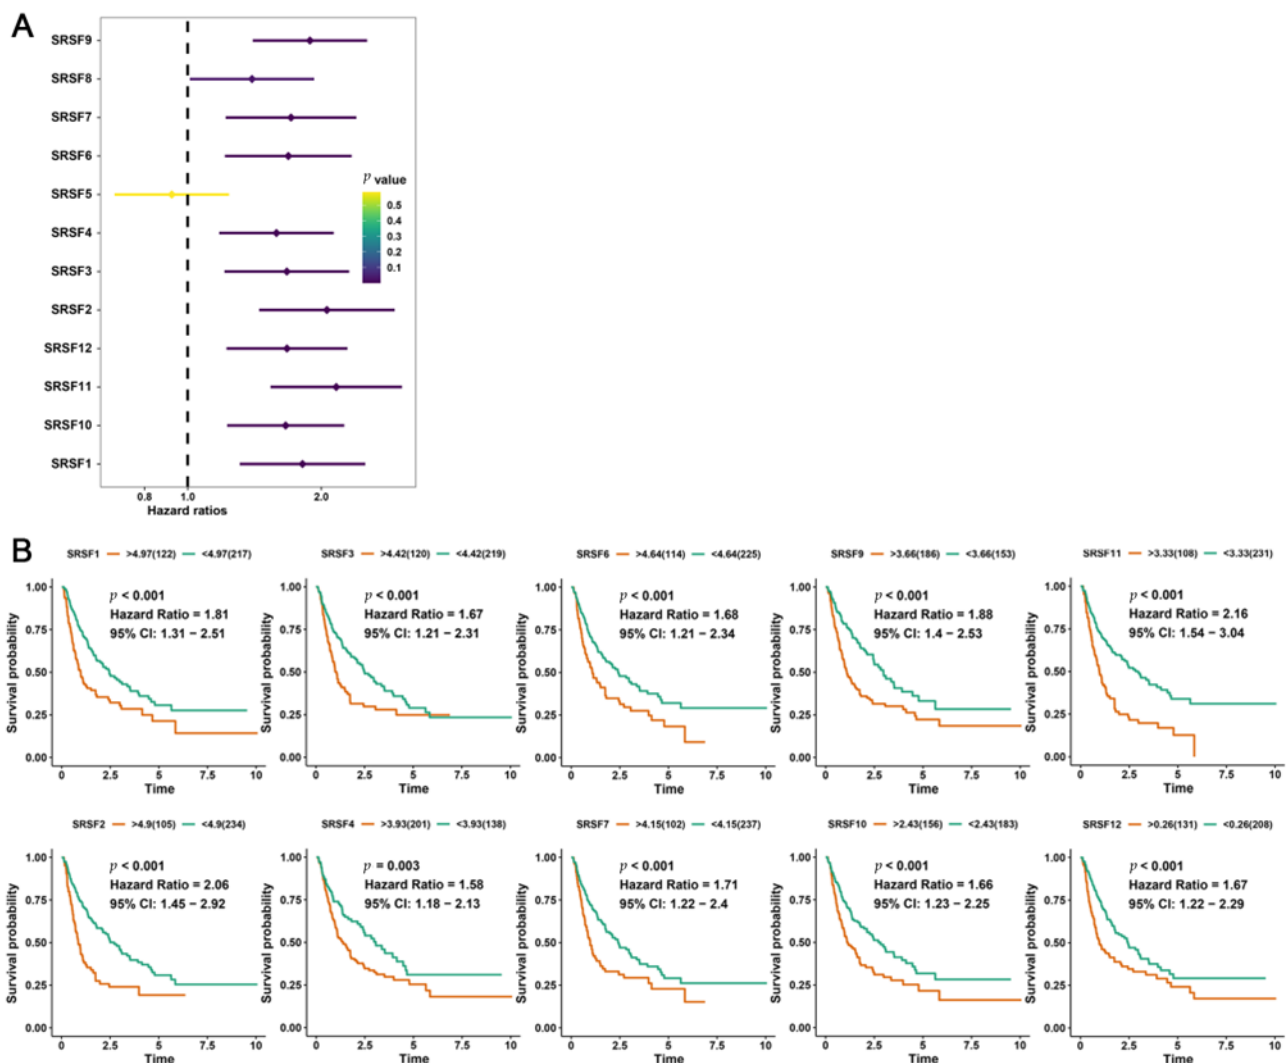

**Figure S1.** The prognostic analysis of SRSF family genes in HCC. (A) The progression-free survival (PFS) analysis of SRSF family genes in HCC. (B) Kaplan-Meier curves of PFS in the aggregated HCC cohort are stratified by the optimal cut-off value of the indicated SRSF genes.

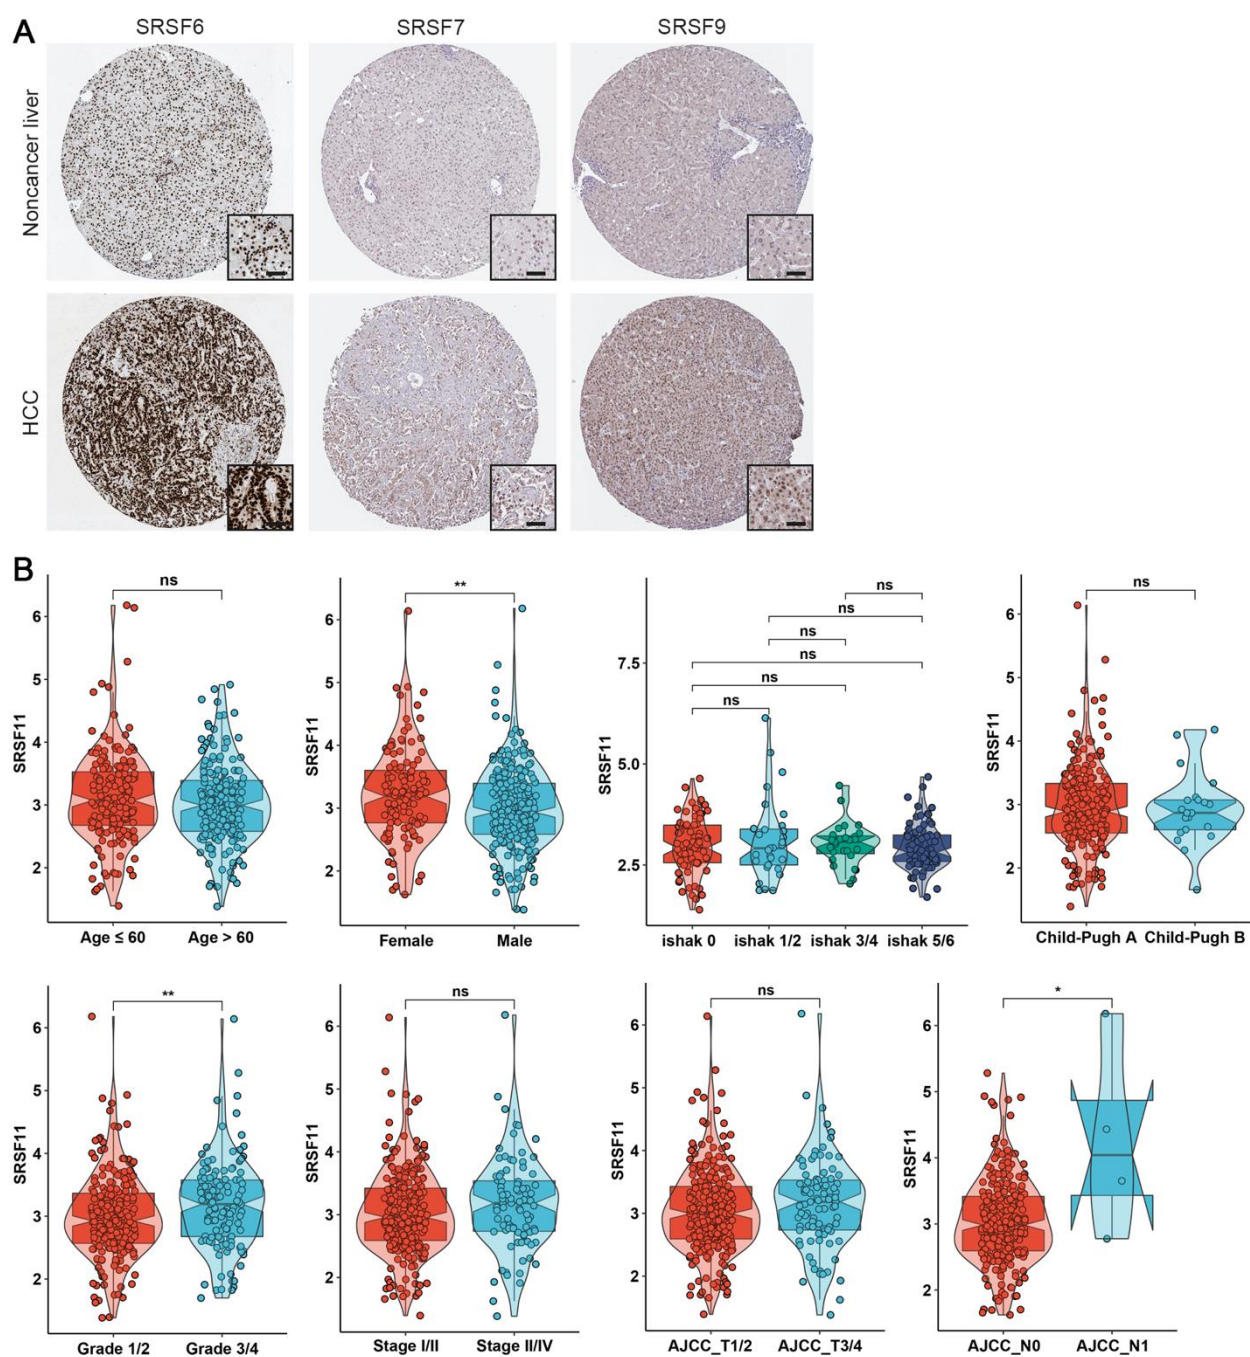

**Figure S2.** (A) Representative IHC images of SRSF family members in HCC and nontumor liver tissue from the Human Protein Atlas. Scale bar denotes 50  $\mu$ m. (B) Correlation analysis of SRSF11 expression and clinicopathological parameters of HCC patients in TCGA-LIHC cohort. Student's *t* test was used for statistics. The asterisks represent the statistical *p* value (\* *p* < 0.05 and \*\* *p* < 0.01). ns, no significance.

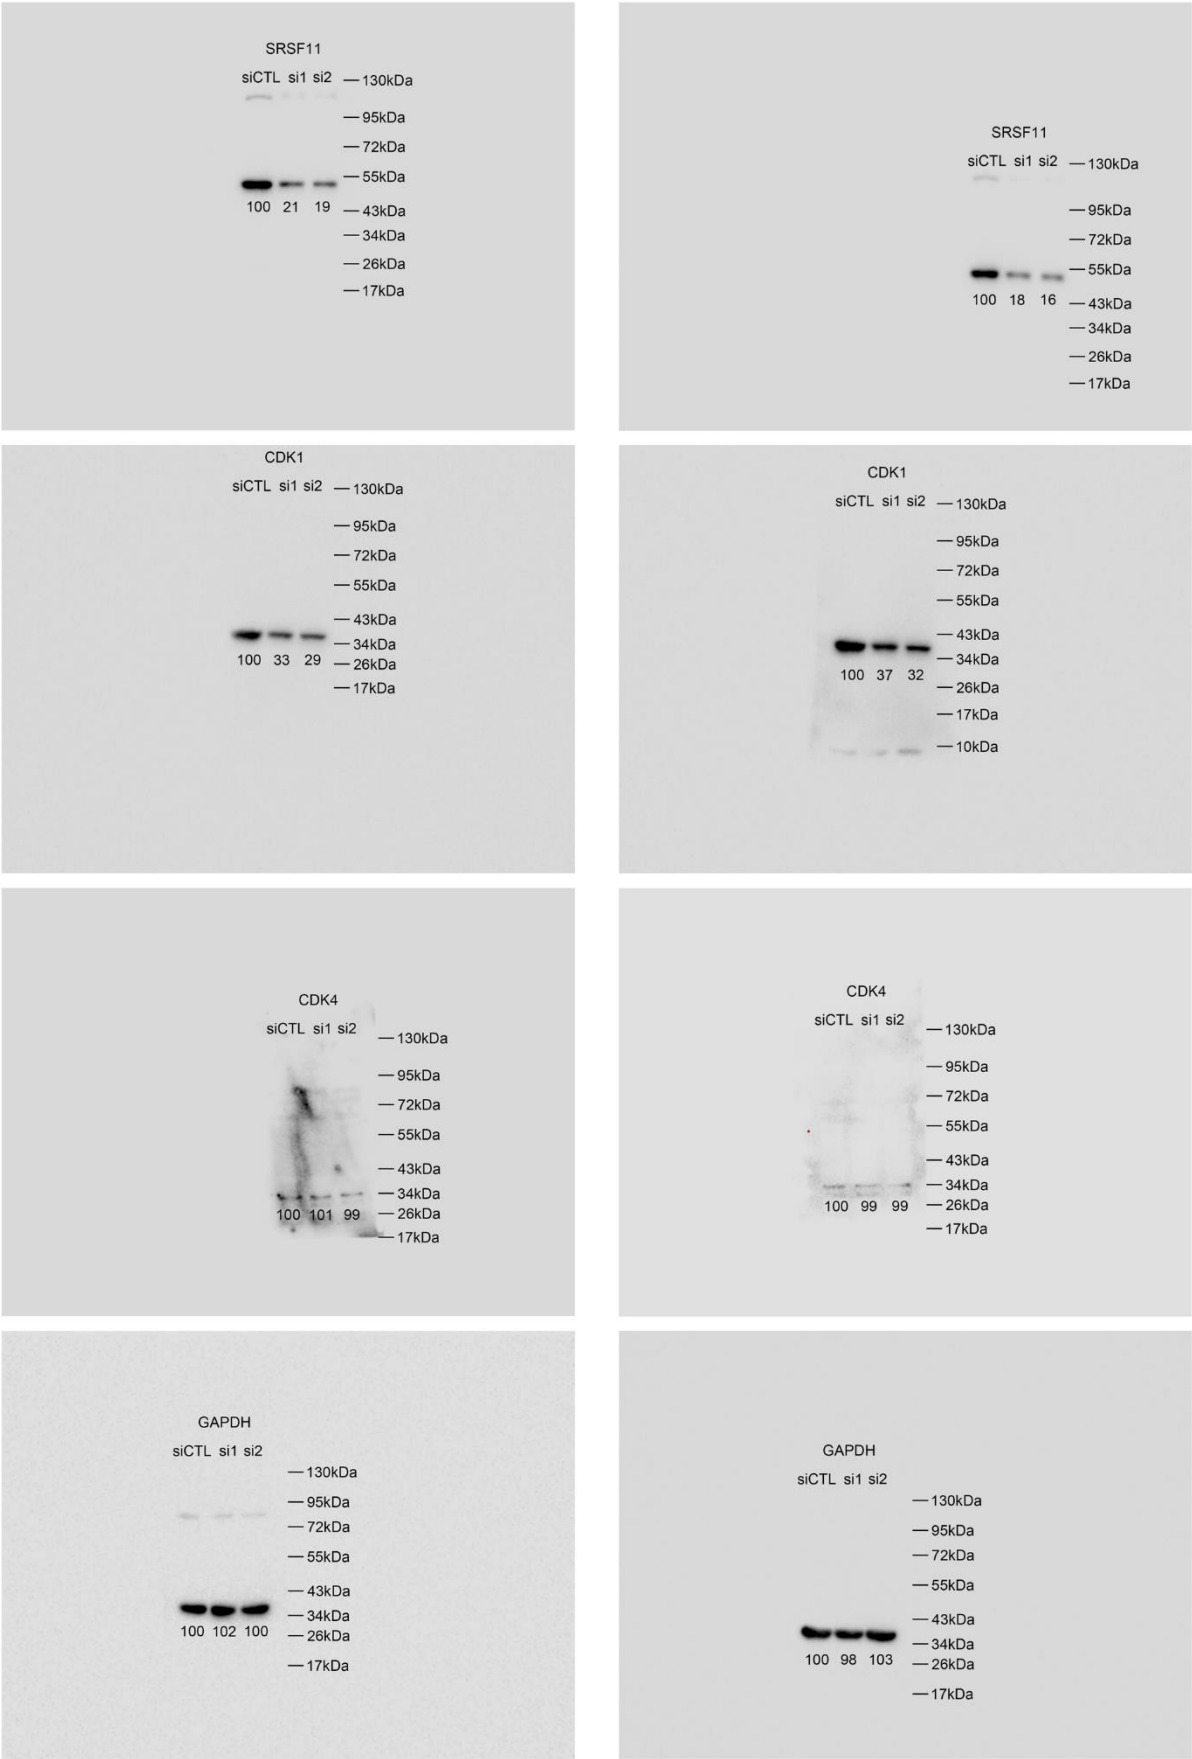

Figure S3. Uncropped Western blot images.

## 2. Supplementary Tables

**Table S1.** Correlations of SRSF11 expression with clinicopathological parameters.

| Clinical Features     |          | SRSF11 Expression |     | p Value |
|-----------------------|----------|-------------------|-----|---------|
|                       |          | High              | Low |         |
| Gender                | Male     | 10                | 11  | 1.000   |
|                       | Female   | 5                 | 4   |         |
| Age (years)           | >55      | 13                | 11  | 0.651   |
|                       | ≤55      | 2                 | 4   |         |
| HBV DNA               | Positive | 14                | 10  | 0.169   |
|                       | Negative | 1                 | 5   |         |
| History of alcoholism | With     | 4                 | 3   | 1.000   |
|                       | Without  | 11                | 12  |         |
| Cirrhosis             | With     | 14                | 12  | 0.598   |
|                       | Without  | 1                 | 3   |         |
| BCLC stage            | A+B      | 12                | 14  | 0.598   |
|                       | C+D      | 3                 | 1   |         |
| AJCC stage            | I-II     | 13                | 14  | 1.000   |
|                       | III      | 2                 | 1   |         |
| Tumor size (cm)       | >5       | 10                | 2   | 0.009   |
|                       | ≤5       | 6                 | 13  |         |
| Tumor number          | 1        | 8                 | 14  | 0.035   |
|                       | >1       | 7                 | 1   |         |
| Differentiation       | G1-G2    | 10                | 12  | 0.682   |
|                       | G3       | 5                 | 3   |         |
| MVI                   | Present  | 5                 | 2   | 0.340   |
|                       | Absent   | 10                | 13  |         |
| Satellite lesions     | Present  | 6                 | 2   | 0.215   |
|                       | Absent   | 9                 | 13  |         |
| AFP                   | Normal   | 3                 | 3   | 1.000   |
|                       | Abnormal | 12                | 12  |         |

BCLC, barcelona clinic liver cancer; AJCC, american joint committee on cancer; MVI, microvascular invasion; AFP, alpha fetoprotein.

**Table S2.** Primary antibodies used in this study.

| Antigens | Manufacturer | Catalog Number | Application                 |
|----------|--------------|----------------|-----------------------------|
| SRSF11   | Abclonal     | A18404         | 1:800 for WB, 1:100 for IHC |
| CDK1     | Proteintech  | 19532-1-AP     | 1:800 for WB                |
| CDK4     | Proteintech  | 11026-1-AP     | 1:800 for WB                |
| GAPDH    | Proteintech  | 60004-1-Ig     | 1:2500 for WB               |

WB, western blot; IHC, immunohistochemistry.

**Table S3.** Sequences of siRNAs in this study.

| Primer Names          | Sequences                   |
|-----------------------|-----------------------------|
| siSRSF11-1 sense      | 5'-GGUUGUUCACUUAUUGUUAUU-3' |
| siSRSF11-1 anti-sense | 5'-UAACAAUAAGUGAACAACCUA-3' |
| siSRSF11-2 sense      | 5'-GGAGAAGAAGAAAGAUAAAGA-3' |
| siSRSF11-2 anti-sense | 5'-UUUAUCUUUCUUCUUCUCCUU-3' |

**Table S4.** The qRT-PCR primers used in this study.

| Primer Names    | Species | Sequences                    |
|-----------------|---------|------------------------------|
| β-actin forward | Human   | 5'-GAAGATCAAGATCATTGCTCC-3'  |
| β-actin reverse | Human   | 5'-TACTCCTGCTTGCTGATCCA-3'   |
| SRSF11 forward  | Human   | 5'-ATGAGCAACACTACCGTCGTC-3'  |
| SRSF11 reverse  | Human   | 5'-GGGAGACATTAGTCACCTGGAT-3' |

**Table S5.** List of SRSF family related genes with correlation >0.6.

| SRSF Family | Gene      | Correlation | p Value   |
|-------------|-----------|-------------|-----------|
| SRSF11      | PRPF38B   | 0.834080969 | 5.07E-161 |
| SRSF9       | CDK4      | 0.827333838 | 3.46E-156 |
| SRSF9       | RAN       | 0.808522959 | 9.49E-144 |
| SRSF11      | FNBP4     | 0.794371272 | 2.87E-135 |
| SRSF9       | TUBA1B    | 0.787801427 | 1.49E-131 |
| SRSF11      | NKTR      | 0.778973402 | 9.10E-127 |
| SRSF11      | MYSM1     | 0.77882016  | 1.10E-126 |
| SRSF9       | RAB35     | 0.777321368 | 6.77E-126 |
| SRSF11      | CCDC14    | 0.775153483 | 9.17E-125 |
| SRSF11      | ZRANB2    | 0.775018622 | 1.08E-124 |
| SRSF3       | TRA2B     | 0.773538779 | 6.27E-124 |
| SRSF11      | PRPF39    | 0.771334901 | 8.43E-123 |
| SRSF11      | TIA1      | 0.769266679 | 9.41E-122 |
| SRSF6       | RBM39     | 0.767680285 | 5.89E-121 |
| SRSF9       | DENR      | 0.767482077 | 7.39E-121 |
| SRSF11      | CCNT2     | 0.767396304 | 8.16E-121 |
| SRSF11      | MTF2      | 0.766379627 | 2.62E-120 |
| SRSF1       | LUC7L3    | 0.763044572 | 1.15E-118 |
| SRSF10      | USP48     | 0.760720698 | 1.54E-117 |
| SRSF9       | RNF34     | 0.760364218 | 2.29E-117 |
| SRSF10      | HP1BP3    | 0.758856577 | 1.22E-116 |
| SRSF2       | CEP95     | 0.757936652 | 3.34E-116 |
| SRSF11      | DMTF1     | 0.753078996 | 6.46E-114 |
| SRSF1       | HNRNPA2B1 | 0.752926118 | 7.61E-114 |
| SRSF11      | SREK1     | 0.752540079 | 1.15E-113 |
| SRSF9       | DIABLO    | 0.750854599 | 6.92E-113 |
| SRSF10      | PRPF38B   | 0.7474775   | 2.41E-111 |
| SRSF11      | ZDHHC17   | 0.746708169 | 5.37E-111 |
| SRSF4       | SRRM1     | 0.745657506 | 1.60E-110 |
| SRSF11      | CREBZF    | 0.74346536  | 1.52E-109 |
| SRSF1       | HNRNPA3   | 0.740143155 | 4.45E-108 |
| SRSF9       | NUP37     | 0.739529922 | 8.24E-108 |
| SRSF9       | UBE2N     | 0.737893983 | 4.24E-107 |
| SRSF1       | TCERG1    | 0.737480603 | 6.40E-107 |
| SRSF2       | PGS1      | 0.73650466  | 1.69E-106 |
| SRSF11      | ZNF326    | 0.735891689 | 3.10E-106 |
| SRSF1       | U2SURP    | 0.734882381 | 8.38E-106 |
| SRSF11      | PNISR     | 0.734639458 | 1.06E-105 |
| SRSF2       | LUC7L3    | 0.734161341 | 1.70E-105 |
| SRSF11      | RBM25     | 0.732892663 | 5.89E-105 |
| SRSF1       | TRA2B     | 0.732087212 | 1.29E-104 |

|        |          |             |           |
|--------|----------|-------------|-----------|
| SRSF11 | SF3B1    | 0.730993973 | 3.72E-104 |
| SRSF9  | MAPKAPK5 | 0.728679126 | 3.45E-103 |
| SRSF2  | HNRNPA3  | 0.728401944 | 4.49E-103 |
| SRSF10 | SRRM1    | 0.728380556 | 4.59E-103 |
| SRSF11 | NPHP3    | 0.728012345 | 6.52E-103 |
| SRSF11 | REV1     | 0.727110648 | 1.54E-102 |
| SRSF3  | RBMX     | 0.726972821 | 1.75E-102 |
| SRSF1  | CPSF6    | 0.726733616 | 2.20E-102 |
| SRSF11 | USP33    | 0.726239658 | 3.51E-102 |
| SRSF11 | LRIG2    | 0.725296621 | 8.56E-102 |
| SRSF2  | NUP85    | 0.724915469 | 1.23E-101 |
| SRSF1  | CNOT6    | 0.723927289 | 3.10E-101 |
| SRSF3  | KHDRBS1  | 0.723510168 | 4.58E-101 |
| SRSF1  | NAA40    | 0.723405358 | 5.05E-101 |
| SRSF1  | SFPQ     | 0.723037366 | 7.12E-101 |
| SRSF1  | RFWD3    | 0.722821857 | 8.71E-101 |
| SRSF10 | FOXJ3    | 0.722639849 | 1.03E-100 |
| SRSF11 | HNRNPH1  | 0.7224533   | 1.23E-100 |
| SRSF10 | SFPQ     | 0.720890813 | 5.23E-100 |
| SRSF11 | RBM39    | 0.720657609 | 6.49E-100 |
| SRSF10 | RBBP4    | 0.720339076 | 8.70E-100 |
| SRSF3  | RIOK1    | 0.719376493 | 2.11E-99  |
| SRSF1  | ATAD5    | 0.718920508 | 3.21E-99  |
| SRSF9  | SSRP1    | 0.718847866 | 3.43E-99  |
| SRSF10 | PNRC2    | 0.718164816 | 6.40E-99  |
| SRSF11 | TMX3     | 0.717797884 | 8.95E-99  |
| SRSF2  | GGA3     | 0.717508975 | 1.16E-98  |
| SRSF1  | CBX1     | 0.716397634 | 3.20E-98  |
| SRSF1  | CCAR1    | 0.715813599 | 5.43E-98  |
| SRSF1  | CCDC43   | 0.715262652 | 8.92E-98  |
| SRSF3  | HNRNPA1  | 0.714578089 | 1.65E-97  |
| SRSF1  | KPNB1    | 0.713656727 | 3.78E-97  |
| SRSF1  | DDX42    | 0.713155257 | 5.92E-97  |
| SRSF1  | TOPBP1   | 0.713091429 | 6.27E-97  |
| SRSF1  | ZNF207   | 0.712840538 | 7.84E-97  |
| SRSF1  | MTF2     | 0.712689965 | 8.97E-97  |
| SRSF3  | PTMA     | 0.712585101 | 9.85E-97  |
| SRSF1  | HNRNPL   | 0.712472022 | 1.09E-96  |
| SRSF3  | HNRNPL   | 0.712264321 | 1.31E-96  |
| SRSF3  | PRIM2    | 0.711327024 | 3.02E-96  |
| SRSF2  | POLG2    | 0.710822007 | 4.72E-96  |
| SRSF9  | CBX1     | 0.710717809 | 5.17E-96  |
| SRSF11 | FOXJ3    | 0.710374927 | 7.00E-96  |
| SRSF11 | RBBP6    | 0.71023152  | 7.95E-96  |
| SRSF10 | MTF2     | 0.709049563 | 2.25E-95  |
| SRSF9  | CCT2     | 0.708954795 | 2.45E-95  |
| SRSF1  | ILF3     | 0.708385339 | 4.03E-95  |
| SRSF1  | CENPK    | 0.707327544 | 1.02E-94  |
| SRSF1  | BUB1B    | 0.707311749 | 1.03E-94  |
| SRSF10 | OTUD3    | 0.706018706 | 3.17E-94  |
| SRSF1  | HNRNPU   | 0.705708048 | 4.15E-94  |

|        |           |             |          |
|--------|-----------|-------------|----------|
| SRSF2  | DBF4B     | 0.705558847 | 4.72E-94 |
| SRSF1  | CEP95     | 0.705441491 | 5.23E-94 |
| SRSF2  | TCERG1    | 0.705401401 | 5.41E-94 |
| SRSF3  | HNRNPD    | 0.705363386 | 5.59E-94 |
| SRSF6  | PRPF39    | 0.705080907 | 7.14E-94 |
| SRSF1  | WDHD1     | 0.704880765 | 8.48E-94 |
| SRSF11 | ANKRD13C  | 0.704702374 | 9.90E-94 |
| SRSF2  | DDX42     | 0.704120061 | 1.63E-93 |
| SRSF11 | MIER1     | 0.703853249 | 2.06E-93 |
| SRSF9  | ANAPC5    | 0.703679759 | 2.39E-93 |
| SRSF2  | U2SURP    | 0.703390302 | 3.06E-93 |
| SRSF3  | MCM3      | 0.702614589 | 5.94E-93 |
| SRSF9  | PRKAG1    | 0.702531968 | 6.38E-93 |
| SRSF2  | HNRNPA2B1 | 0.702508874 | 6.50E-93 |
| SRSF1  | NCAPD2    | 0.702237397 | 8.20E-93 |
| SRSF1  | ACTL6A    | 0.702195636 | 8.50E-93 |
| SRSF9  | TUBA1C    | 0.701202782 | 1.98E-92 |
| SRSF2  | NAA40     | 0.701095383 | 2.17E-92 |
| SRSF2  | SUPT7L    | 0.700976223 | 2.40E-92 |
| SRSF10 | ZMYM1     | 0.700840198 | 2.69E-92 |
| SRSF9  | SAE1      | 0.70072842  | 2.96E-92 |
| SRSF3  | HNRNPC    | 0.70044657  | 3.76E-92 |
| SRSF1  | U2AF2     | 0.699740095 | 6.83E-92 |
| SRSF9  | SART3     | 0.699605086 | 7.66E-92 |
| SRSF1  | DBF4B     | 0.699572648 | 7.87E-92 |
| SRSF11 | TCERG1    | 0.699434075 | 8.85E-92 |
| SRSF10 | ZMYM4     | 0.698734354 | 1.60E-91 |
| SRSF11 | CCNL1     | 0.698135632 | 2.64E-91 |
| SRSF2  | SFPQ      | 0.698113769 | 2.69E-91 |
| SRSF11 | PKN2      | 0.69807444  | 2.78E-91 |
| SRSF11 | PTBP2     | 0.697656852 | 3.94E-91 |
| SRSF2  | TRA2B     | 0.696882264 | 7.53E-91 |
| SRSF11 | ZNF644    | 0.696165373 | 1.37E-90 |
| SRSF3  | HNRNPA3   | 0.696052093 | 1.50E-90 |
| SRSF1  | KIF18B    | 0.695966534 | 1.61E-90 |
| SRSF11 | RBM33     | 0.695651696 | 2.10E-90 |
| SRSF1  | FANCD2    | 0.694909582 | 3.88E-90 |
| SRSF4  | USP48     | 0.694733267 | 4.49E-90 |
| SRSF2  | KNTC1     | 0.694439433 | 5.73E-90 |
| SRSF11 | NR2C2     | 0.694304276 | 6.40E-90 |
| SRSF1  | KIF23     | 0.694153698 | 7.25E-90 |
| SRSF2  | PRPF39    | 0.6941333   | 7.37E-90 |
| SRSF11 | SETD5     | 0.6935606   | 1.18E-89 |
| SRSF10 | SF3B1     | 0.693403673 | 1.35E-89 |
| SRSF1  | KNTC1     | 0.693326753 | 1.43E-89 |
| SRSF2  | ATAD5     | 0.693111472 | 1.71E-89 |
| SRSF9  | SMARCB1   | 0.692917862 | 2.01E-89 |
| SRSF9  | PPHLN1    | 0.692594879 | 2.61E-89 |
| SRSF2  | IQCB1     | 0.692510103 | 2.80E-89 |
| SRSF1  | PGS1      | 0.692249293 | 3.47E-89 |
| SRSF11 | U2SURP    | 0.691894387 | 4.64E-89 |

|        |          |             |          |
|--------|----------|-------------|----------|
| SRSF11 | STX16    | 0.69150473  | 6.38E-89 |
| SRSF1  | YEATS2   | 0.691361075 | 7.17E-89 |
| SRSF10 | EIF4G3   | 0.691128178 | 8.67E-89 |
| SRSF1  | MITD1    | 0.691087854 | 8.96E-89 |
| SRSF10 | PPP1R12A | 0.691008949 | 9.56E-89 |
| SRSF7  | TRA2B    | 0.690376888 | 1.60E-88 |
| SRSF1  | CENPF    | 0.690276619 | 1.73E-88 |
| SRSF1  | NUF2     | 0.689786651 | 2.58E-88 |
| SRSF1  | UBA2     | 0.689094884 | 4.52E-88 |
| SRSF1  | KIF18A   | 0.689088064 | 4.54E-88 |
| SRSF1  | ECT2     | 0.688899058 | 5.29E-88 |
| SRSF1  | HNRNPH3  | 0.68884734  | 5.52E-88 |
| SRSF10 | RBM12B   | 0.688839314 | 5.55E-88 |
| SRSF11 | MON2     | 0.688652999 | 6.46E-88 |
| SRSF10 | CAPZA1   | 0.688493121 | 7.34E-88 |
| SRSF2  | ILF3     | 0.688270955 | 8.79E-88 |
| SRSF1  | ARL6IP6  | 0.68811687  | 9.95E-88 |
| SRSF11 | RLF      | 0.688076934 | 1.03E-87 |
| SRSF1  | RCC2     | 0.687985335 | 1.11E-87 |
| SRSF1  | LMNB1    | 0.687947183 | 1.14E-87 |
| SRSF1  | KIF11    | 0.687752516 | 1.33E-87 |
| SRSF1  | NCAPH    | 0.687734961 | 1.35E-87 |
| SRSF1  | NUP107   | 0.687638286 | 1.46E-87 |
| SRSF11 | INO80D   | 0.687626037 | 1.48E-87 |
| SRSF3  | HNRNPM   | 0.687067362 | 2.31E-87 |
| SRSF1  | TTF2     | 0.68706627  | 2.31E-87 |
| SRSF9  | SET      | 0.686994964 | 2.45E-87 |
| SRSF9  | HNRNPM   | 0.686803838 | 2.86E-87 |
| SRSF11 | PAN3     | 0.686302791 | 4.26E-87 |
| SRSF9  | DNAJC9   | 0.685853977 | 6.10E-87 |
| SRSF2  | PRPF38B  | 0.685831052 | 6.21E-87 |
| SRSF2  | HNRNPH3  | 0.685736816 | 6.70E-87 |
| SRSF1  | GTF3C2   | 0.685671861 | 7.05E-87 |
| SRSF1  | CDK2     | 0.685430478 | 8.55E-87 |
| SRSF10 | RLF      | 0.685307796 | 9.43E-87 |
| SRSF3  | MAPRE1   | 0.685231398 | 1.00E-86 |
| SRSF2  | CSNK1D   | 0.68514256  | 1.08E-86 |
| SRSF10 | FUBP1    | 0.684785779 | 1.43E-86 |
| SRSF1  | SUPT7L   | 0.684457103 | 1.85E-86 |
| SRSF1  | E2F6     | 0.684450313 | 1.86E-86 |
| SRSF10 | RBBP6    | 0.684320929 | 2.07E-86 |
| SRSF1  | PRPF39   | 0.684186214 | 2.30E-86 |
| SRSF11 | RSRC2    | 0.684014326 | 2.63E-86 |
| SRSF2  | ZNF207   | 0.683996522 | 2.67E-86 |
| SRSF1  | HJURP    | 0.683972849 | 2.72E-86 |
| SRSF1  | CEP55    | 0.683838903 | 3.03E-86 |
| SRSF2  | MTF2     | 0.683778063 | 3.17E-86 |
| SRSF9  | DDX23    | 0.683759875 | 3.22E-86 |
| SRSF2  | RBM39    | 0.683722344 | 3.32E-86 |
| SRSF1  | NCBP2    | 0.683602837 | 3.65E-86 |
| SRSF11 | NR2C1    | 0.683326228 | 4.54E-86 |



|        |           |             |          |
|--------|-----------|-------------|----------|
| SRSF1  | CASP2     | 0.683304548 | 4.62E-86 |
| SRSF1  | PRPF38A   | 0.683203159 | 5.00E-86 |
| SRSF1  | HELLS     | 0.683011962 | 5.82E-86 |
| SRSF1  | TDG       | 0.682668936 | 7.62E-86 |
| SRSF1  | ORC6      | 0.682539463 | 8.44E-86 |
| SRSF1  | RNF34     | 0.682355091 | 9.76E-86 |
| SRSF10 | HNRNPR    | 0.682290718 | 1.03E-85 |
| SRSF4  | HP1BP3    | 0.682096886 | 1.20E-85 |
| SRSF10 | ZDHC17    | 0.682014584 | 1.28E-85 |
| SRSF1  | PRPF38B   | 0.681826359 | 1.48E-85 |
| SRSF1  | COIL      | 0.681654913 | 1.69E-85 |
| SRSF6  | FNBP4     | 0.681630783 | 1.72E-85 |
| SRSF11 | RSBN1     | 0.681096656 | 2.62E-85 |
| SRSF2  | ARL6IP6   | 0.680966435 | 2.90E-85 |
| SRSF2  | E2F6      | 0.680556944 | 3.99E-85 |
| SRSF2  | HNRNPH1   | 0.680168537 | 5.41E-85 |
| SRSF10 | EYA3      | 0.679751289 | 7.49E-85 |
| SRSF2  | NUP107    | 0.679749561 | 7.50E-85 |
| SRSF1  | UHRF1     | 0.679516583 | 8.99E-85 |
| SRSF9  | YWHAQ     | 0.679487485 | 9.19E-85 |
| SRSF10 | SMC4      | 0.679308923 | 1.06E-84 |
| SRSF1  | RAD51AP1  | 0.679303813 | 1.06E-84 |
| SRSF11 | ZNF638    | 0.679273203 | 1.09E-84 |
| SRSF10 | CRLF3     | 0.678961977 | 1.38E-84 |
| SRSF6  | RBM25     | 0.678936231 | 1.41E-84 |
| SRSF1  | POLQ      | 0.678716373 | 1.67E-84 |
| SRSF2  | HNRNPD    | 0.67835839  | 2.21E-84 |
| SRSF1  | XRCC2     | 0.678204518 | 2.49E-84 |
| SRSF1  | PLK4      | 0.678200667 | 2.50E-84 |
| SRSF2  | MYO19     | 0.678163461 | 2.57E-84 |
| SRSF1  | IQCB1     | 0.678121343 | 2.65E-84 |
| SRSF1  | CDC7      | 0.677867989 | 3.23E-84 |
| SRSF11 | ZMYM1     | 0.677855179 | 3.26E-84 |
| SRSF3  | FUS       | 0.677569559 | 4.06E-84 |
| SRSF9  | CCT5      | 0.677379128 | 4.71E-84 |
| SRSF1  | SPATS2    | 0.677357928 | 4.78E-84 |
| SRSF1  | BRPF1     | 0.677127508 | 5.71E-84 |
| SRSF1  | DNMT1     | 0.677091587 | 5.87E-84 |
| SRSF10 | SPEN      | 0.677075284 | 5.95E-84 |
| SRSF11 | ZCCHC8    | 0.676864241 | 7.00E-84 |
| SRSF1  | FANCL     | 0.676253736 | 1.12E-83 |
| SRSF3  | HNRNPU    | 0.676219143 | 1.15E-83 |
| SRSF11 | ZNF354B   | 0.676068468 | 1.29E-83 |
| SRSF2  | KIF18B    | 0.675876641 | 1.49E-83 |
| SRSF3  | HNRNPA0   | 0.675687546 | 1.73E-83 |
| SRSF2  | DDX55     | 0.675495064 | 2.00E-83 |
| SRSF1  | ARHGAP11A | 0.675375506 | 2.19E-83 |
| SRSF9  | GTPBP4    | 0.675168719 | 2.57E-83 |
| SRSF3  | HNRNPH3   | 0.674920737 | 3.11E-83 |
| SRSF2  | BRPF1     | 0.674840985 | 3.30E-83 |
| SRSF1  | SMARCD1   | 0.674760523 | 3.51E-83 |

|        |         |             |          |
|--------|---------|-------------|----------|
| SRSF10 | VRK2    | 0.674585586 | 4.01E-83 |
| SRSF6  | TIA1    | 0.674538242 | 4.16E-83 |
| SRSF10 | SETD5   | 0.674475187 | 4.36E-83 |
| SRSF1  | RBMX    | 0.674351805 | 4.79E-83 |
| SRSF2  | HELLS   | 0.674208257 | 5.35E-83 |
| SRSF1  | WDR75   | 0.674091529 | 5.84E-83 |
| SRSF1  | C4orf46 | 0.674008399 | 6.23E-83 |
| SRSF2  | GTF3C2  | 0.673879093 | 6.87E-83 |
| SRSF10 | S100PBP | 0.673751411 | 7.57E-83 |
| SRSF2  | HNRNPL  | 0.673475403 | 9.34E-83 |
| SRSF10 | TRA2B   | 0.673370136 | 1.01E-82 |
| SRSF10 | USP33   | 0.673370027 | 1.01E-82 |
| SRSF11 | ZNF700  | 0.673063137 | 1.28E-82 |
| SRSF10 | ZRANB2  | 0.672863465 | 1.49E-82 |
| SRSF1  | HNRNPD  | 0.672856724 | 1.49E-82 |
| SRSF1  | DCAF16  | 0.672387299 | 2.13E-82 |
| SRSF3  | THUMPD2 | 0.672383968 | 2.14E-82 |
| SRSF1  | MTBP    | 0.672344051 | 2.20E-82 |
| SRSF10 | RCC2    | 0.672215861 | 2.42E-82 |
| SRSF9  | METAP2  | 0.67218128  | 2.49E-82 |
| SRSF10 | CCAR1   | 0.67209067  | 2.67E-82 |
| SRSF1  | RAD51D  | 0.671741468 | 3.47E-82 |
| SRSF2  | CENPK   | 0.671685706 | 3.62E-82 |
| SRSF9  | AACS    | 0.671598499 | 3.86E-82 |
| SRSF1  | KIF20A  | 0.671512105 | 4.12E-82 |
| SRSF1  | FANCB   | 0.671454871 | 4.31E-82 |
| SRSF11 | LUC7L3  | 0.67124713  | 5.03E-82 |
| SRSF7  | WDR75   | 0.671214772 | 5.16E-82 |
| SRSF1  | MMS22L  | 0.671133663 | 5.48E-82 |
| SRSF3  | SFPQ    | 0.670945631 | 6.32E-82 |
| SRSF2  | WDR75   | 0.670865388 | 6.71E-82 |
| SRSF1  | RBM12B  | 0.670828217 | 6.90E-82 |
| SRSF2  | U2AF2   | 0.670666188 | 7.79E-82 |
| SRSF9  | PPP1CC  | 0.670531586 | 8.62E-82 |
| SRSF1  | CRLF3   | 0.670504564 | 8.80E-82 |
| SRSF9  | GMPS    | 0.670190107 | 1.11E-81 |
| SRSF10 | MYSM1   | 0.670187208 | 1.12E-81 |
| SRSF4  | RLF     | 0.670050692 | 1.24E-81 |
| SRSF1  | ERCC3   | 0.670037523 | 1.25E-81 |
| SRSF1  | STIL    | 0.669733951 | 1.57E-81 |
| SRSF1  | GTSE1   | 0.669732793 | 1.57E-81 |
| SRSF2  | EWSR1   | 0.669625449 | 1.70E-81 |
| SRSF9  | CORO1C  | 0.669595637 | 1.74E-81 |
| SRSF9  | CDK2AP1 | 0.669560109 | 1.79E-81 |
| SRSF3  | NXT1    | 0.669337299 | 2.11E-81 |
| SRSF11 | USP24   | 0.669333164 | 2.12E-81 |
| SRSF10 | NR2C2   | 0.669333128 | 2.12E-81 |
| SRSF1  | TLK2    | 0.669019262 | 2.67E-81 |
| SRSF3  | CDCA4   | 0.668778667 | 3.20E-81 |
| SRSF1  | TARDBP  | 0.668411368 | 4.21E-81 |
| SRSF3  | CBX3    | 0.668167651 | 5.04E-81 |

|        |          |             |          |
|--------|----------|-------------|----------|
| SRSF10 | CCDC14   | 0.668061898 | 5.46E-81 |
| SRSF1  | GIN51    | 0.667920542 | 6.06E-81 |
| SRSF11 | HEATR5B  | 0.667905007 | 6.13E-81 |
| SRSF10 | NAA40    | 0.667439482 | 8.66E-81 |
| SRSF1  | GGA3     | 0.667257673 | 9.91E-81 |
| SRSF10 | ARL13B   | 0.667111523 | 1.10E-80 |
| SRSF2  | ORC6     | 0.666931983 | 1.26E-80 |
| SRSF2  | MITD1    | 0.666922419 | 1.27E-80 |
| SRSF1  | RBL1     | 0.666790847 | 1.40E-80 |
| SRSF1  | MSH2     | 0.666532907 | 1.70E-80 |
| SRSF2  | TLK2     | 0.666433716 | 1.82E-80 |
| SRSF11 | RBM5     | 0.666407527 | 1.86E-80 |
| SRSF1  | HEATR6   | 0.666338727 | 1.96E-80 |
| SRSF9  | DHX37    | 0.666220098 | 2.14E-80 |
| SRSF6  | STX16    | 0.665978722 | 2.55E-80 |
| SRSF10 | ATM      | 0.665775278 | 2.97E-80 |
| SRSF2  | NUF2     | 0.6655393   | 3.53E-80 |
| SRSF2  | CLK2     | 0.665497052 | 3.64E-80 |
| SRSF10 | DYNC1LI2 | 0.665372672 | 3.99E-80 |
| SRSF1  | KIAA1841 | 0.665265706 | 4.31E-80 |
| SRSF2  | S100PBP  | 0.665196059 | 4.54E-80 |
| SRSF2  | HMGB2    | 0.66509636  | 4.89E-80 |
| SRSF1  | RPS6KB1  | 0.66498175  | 5.32E-80 |
| SRSF10 | G2E3     | 0.664794466 | 6.10E-80 |
| SRSF3  | ACTL6A   | 0.664682421 | 6.62E-80 |
| SRSF2  | RPS6KB1  | 0.664614719 | 6.96E-80 |
| SRSF2  | CCDC43   | 0.664583144 | 7.12E-80 |
| SRSF2  | RCC2     | 0.66438128  | 8.26E-80 |
| SRSF3  | ARL6IP6  | 0.664210407 | 9.36E-80 |
| SRSF1  | CDCA4    | 0.664043237 | 1.06E-79 |
| SRSF1  | SASS6    | 0.66402135  | 1.08E-79 |
| SRSF9  | KHDRBS1  | 0.663984516 | 1.10E-79 |
| SRSF1  | MELK     | 0.663724536 | 1.34E-79 |
| SRSF2  | TARDBP   | 0.66364114  | 1.42E-79 |
| SRSF10 | TTF2     | 0.663609369 | 1.45E-79 |
| SRSF11 | ZMYM4    | 0.663592824 | 1.47E-79 |
| SRSF10 | PAPOLG   | 0.66358905  | 1.47E-79 |
| SRSF2  | BUB1B    | 0.663385792 | 1.71E-79 |
| SRSF9  | PLK1     | 0.663212479 | 1.94E-79 |
| SRSF1  | MYO19    | 0.66316875  | 2.00E-79 |
| SRSF11 | SRRM1    | 0.663151667 | 2.03E-79 |
| SRSF9  | DDX54    | 0.663130123 | 2.06E-79 |
| SRSF2  | THOC1    | 0.662576491 | 3.09E-79 |
| SRSF9  | PWP1     | 0.662543268 | 3.16E-79 |
| SRSF10 | SMCHD1   | 0.662529684 | 3.19E-79 |
| SRSF1  | IFT80    | 0.662471059 | 3.33E-79 |
| SRSF2  | FANCD2   | 0.662442717 | 3.40E-79 |
| SRSF2  | CDK2     | 0.66240302  | 3.50E-79 |
| SRSF10 | PPP1R8   | 0.662334762 | 3.68E-79 |
| SRSF1  | KHDRBS1  | 0.662276674 | 3.84E-79 |
| SRSF10 | CASP8AP2 | 0.662234968 | 3.96E-79 |

|        |          |             |          |
|--------|----------|-------------|----------|
| SRSF1  | ANLN     | 0.662221883 | 3.99E-79 |
| SRSF1  | H2AFY    | 0.662213799 | 4.02E-79 |
| SRSF2  | POLQ     | 0.662116555 | 4.31E-79 |
| SRSF3  | CCDC59   | 0.662011045 | 4.66E-79 |
| SRSF9  | ACTL6A   | 0.661861207 | 5.19E-79 |
| SRSF7  | HNRNPH3  | 0.661734303 | 5.69E-79 |
| SRSF10 | DR1      | 0.661710988 | 5.79E-79 |
| SRSF2  | LMNB1    | 0.661626607 | 6.15E-79 |
| SRSF2  | UNK      | 0.661602345 | 6.26E-79 |
| SRSF10 | ZBTB40   | 0.66150382  | 6.73E-79 |
| SRSF9  | TRAFD1   | 0.661186267 | 8.47E-79 |
| SRSF10 | NKTR     | 0.661033683 | 9.46E-79 |
| SRSF1  | MAML1    | 0.661012939 | 9.60E-79 |
| SRSF2  | OTUD3    | 0.660943356 | 1.01E-78 |
| SRSF1  | ZFC3H1   | 0.660806302 | 1.11E-78 |
| SRSF1  | NUP43    | 0.660778465 | 1.14E-78 |
| SRSF9  | NCL      | 0.660655953 | 1.24E-78 |
| SRSF3  | CHTOP    | 0.660448913 | 1.44E-78 |
| SRSF1  | STX6     | 0.660384689 | 1.51E-78 |
| SRSF2  | HEATR6   | 0.660365351 | 1.53E-78 |
| SRSF9  | SMARCD1  | 0.660294643 | 1.61E-78 |
| SRSF1  | MCM8     | 0.66008662  | 1.87E-78 |
| SRSF10 | PUM1     | 0.660012933 | 1.98E-78 |
| SRSF2  | HJURP    | 0.659939578 | 2.08E-78 |
| SRSF9  | COMMD2   | 0.659840288 | 2.24E-78 |
| SRSF11 | HP1BP3   | 0.659736509 | 2.41E-78 |
| SRSF3  | HDAC2    | 0.659629898 | 2.60E-78 |
| SRSF11 | NAA25    | 0.659605215 | 2.65E-78 |
| SRSF3  | TBC1D22B | 0.659537304 | 2.78E-78 |
| SRSF1  | TOP2A    | 0.659456186 | 2.95E-78 |
| SRSF1  | S100PBP  | 0.659294522 | 3.31E-78 |
| SRSF1  | DNM1L    | 0.659285609 | 3.34E-78 |
| SRSF1  | SMC4     | 0.659274256 | 3.36E-78 |
| SRSF4  | S100PBP  | 0.659175616 | 3.61E-78 |
| SRSF3  | NOP56    | 0.659145982 | 3.69E-78 |
| SRSF10 | SP1      | 0.658834822 | 4.61E-78 |
| SRSF10 | ZC3H7A   | 0.658725496 | 4.99E-78 |
| SRSF9  | HNRNPC   | 0.658695382 | 5.10E-78 |
| SRSF11 | STXBP3   | 0.658684216 | 5.14E-78 |
| SRSF1  | DVL3     | 0.658589448 | 5.50E-78 |
| SRSF1  | METTL4   | 0.658513784 | 5.80E-78 |
| SRSF1  | SART3    | 0.658439915 | 6.12E-78 |
| SRSF11 | ZNF518A  | 0.658432608 | 6.15E-78 |
| SRSF9  | MRPL42   | 0.658414984 | 6.23E-78 |
| SRSF2  | ACIN1    | 0.65835051  | 6.52E-78 |
| SRSF9  | U2AF2    | 0.658237961 | 7.07E-78 |
| SRSF9  | NCAPH    | 0.658154892 | 7.50E-78 |
| SRSF9  | CPSF6    | 0.658101164 | 7.80E-78 |
| SRSF2  | SART3    | 0.658051111 | 8.08E-78 |
| SRSF1  | TRIP13   | 0.65780882  | 9.61E-78 |
| SRSF1  | MCM3     | 0.657760656 | 9.95E-78 |

|        |         |             |          |
|--------|---------|-------------|----------|
| SRSF9  | PPP6R1  | 0.657733285 | 1.01E-77 |
| SRSF2  | ERCC3   | 0.657569473 | 1.14E-77 |
| SRSF10 | HIPK1   | 0.65751981  | 1.18E-77 |
| SRSF1  | DEPDC1B | 0.657406212 | 1.28E-77 |
| SRSF11 | CHD2    | 0.657329091 | 1.35E-77 |
| SRSF3  | ILF2    | 0.657320356 | 1.36E-77 |
| SRSF1  | POLA1   | 0.657290931 | 1.39E-77 |
| SRSF10 | PKN2    | 0.657177937 | 1.51E-77 |
| SRSF1  | RBBP4   | 0.657173511 | 1.51E-77 |
| SRSF6  | RBM5    | 0.656886974 | 1.86E-77 |
| SRSF2  | PRPF38A | 0.656868529 | 1.88E-77 |
| SRSF9  | GATC    | 0.656821265 | 1.94E-77 |
| SRSF10 | PNISR   | 0.656803561 | 1.97E-77 |
| SRSF2  | CDCA4   | 0.65655269  | 2.35E-77 |
| SRSF1  | TRIM59  | 0.656403289 | 2.62E-77 |
| SRSF1  | ARMC8   | 0.656329092 | 2.76E-77 |
| SRSF2  | RAD54L  | 0.656166292 | 3.10E-77 |
| SRSF10 | U2SURP  | 0.655954552 | 3.60E-77 |
| SRSF1  | ZNF248  | 0.655898381 | 3.75E-77 |
| SRSF1  | GPD2    | 0.65583683  | 3.91E-77 |
| SRSF11 | S100PBP | 0.655722506 | 4.24E-77 |
| SRSF9  | KPNA2   | 0.655680807 | 4.37E-77 |
| SRSF2  | TDG     | 0.655622858 | 4.55E-77 |
| SRSF2  | CDC7    | 0.65549991  | 4.97E-77 |
| SRSF11 | MED23   | 0.655453363 | 5.14E-77 |
| SRSF11 | IFT80   | 0.655429428 | 5.22E-77 |
| SRSF9  | GRB2    | 0.655414931 | 5.28E-77 |
| SRSF2  | ANKLE2  | 0.655294721 | 5.75E-77 |
| SRSF10 | CCNT2   | 0.655113732 | 6.53E-77 |
| SRSF9  | DCTN2   | 0.655079184 | 6.69E-77 |
| SRSF11 | GPATCH8 | 0.654975871 | 7.20E-77 |
| SRSF1  | LSM14A  | 0.654853264 | 7.85E-77 |
| SRSF10 | ADAM17  | 0.654830762 | 7.98E-77 |
| SRSF10 | FNBP4   | 0.654808486 | 8.10E-77 |
| SRSF2  | NCAPH   | 0.65464413  | 9.10E-77 |
| SRSF1  | KIF2C   | 0.654641492 | 9.12E-77 |
| SRSF2  | RBM5    | 0.654562705 | 9.64E-77 |
| SRSF1  | NCOA5   | 0.654495531 | 1.01E-76 |
| SRSF1  | ERCC6L  | 0.654457568 | 1.04E-76 |
| SRSF1  | BUB1    | 0.654348552 | 1.12E-76 |
| SRSF10 | CEP170  | 0.654309468 | 1.15E-76 |
| SRSF10 | STK4    | 0.654262216 | 1.19E-76 |
| SRSF10 | YTHDC1  | 0.654219599 | 1.23E-76 |
| SRSF3  | DEK     | 0.654155731 | 1.28E-76 |
| SRSF1  | NUSAP1  | 0.654138661 | 1.30E-76 |
| SRSF1  | PRC1    | 0.653744339 | 1.72E-76 |
| SRSF4  | YTHDF2  | 0.653673782 | 1.80E-76 |
| SRSF2  | FBXO5   | 0.653658764 | 1.82E-76 |
| SRSF2  | TIA1    | 0.653633556 | 1.86E-76 |
| SRSF2  | FANCL   | 0.653619451 | 1.87E-76 |
| SRSF2  | STX16   | 0.653453677 | 2.11E-76 |

|        |           |             |          |
|--------|-----------|-------------|----------|
| SRSF2  | FNBP4     | 0.65312285  | 2.66E-76 |
| SRSF10 | PPIL4     | 0.652783783 | 3.37E-76 |
| SRSF3  | FANCE     | 0.652769077 | 3.40E-76 |
| SRSF2  | EZH2      | 0.652751586 | 3.45E-76 |
| SRSF10 | BCLAF1    | 0.652746406 | 3.46E-76 |
| SRSF9  | PDCD10    | 0.652706408 | 3.56E-76 |
| SRSF10 | TOP1      | 0.652650845 | 3.70E-76 |
| SRSF1  | DBR1      | 0.652491109 | 4.14E-76 |
| SRSF1  | ZBED5     | 0.652480717 | 4.17E-76 |
| SRSF9  | TPM3      | 0.652443943 | 4.28E-76 |
| SRSF11 | THRAP3    | 0.652412264 | 4.37E-76 |
| SRSF9  | PRDM4     | 0.652254476 | 4.88E-76 |
| SRSF2  | KIF23     | 0.652194612 | 5.09E-76 |
| SRSF11 | ARGLU1    | 0.65216837  | 5.18E-76 |
| SRSF1  | ANKLE2    | 0.652164115 | 5.20E-76 |
| SRSF1  | ZWILCH    | 0.652047839 | 5.64E-76 |
| SRSF1  | RBM39     | 0.651944021 | 6.06E-76 |
| SRSF7  | MITD1     | 0.651925958 | 6.14E-76 |
| SRSF10 | SP3       | 0.651810469 | 6.66E-76 |
| SRSF1  | PHIP      | 0.651740821 | 6.99E-76 |
| SRSF1  | DDX55     | 0.651683842 | 7.27E-76 |
| SRSF1  | BRCA1     | 0.651626133 | 7.57E-76 |
| SRSF1  | VRK2      | 0.651596803 | 7.73E-76 |
| SRSF10 | NEDD1     | 0.651522378 | 8.14E-76 |
| SRSF3  | EEF1E1    | 0.651481181 | 8.38E-76 |
| SRSF1  | ZBTB34    | 0.651406315 | 8.83E-76 |
| SRSF9  | MORF4L1   | 0.651342251 | 9.23E-76 |
| SRSF2  | DNMT1     | 0.651333647 | 9.29E-76 |
| SRSF10 | PHACTR4   | 0.651319072 | 9.38E-76 |
| SRSF1  | ZNF142    | 0.651289723 | 9.58E-76 |
| SRSF1  | MCM6      | 0.651277085 | 9.66E-76 |
| SRSF2  | UTP6      | 0.651156037 | 1.05E-75 |
| SRSF3  | KIFC1     | 0.651112729 | 1.08E-75 |
| SRSF11 | PHF12     | 0.651105943 | 1.09E-75 |
| SRSF2  | KPNB1     | 0.651056092 | 1.13E-75 |
| SRSF1  | TIA1      | 0.651030632 | 1.15E-75 |
| SRSF1  | POLD3     | 0.65076851  | 1.38E-75 |
| SRSF1  | CENPE     | 0.650628719 | 1.52E-75 |
| SRSF1  | NCAPG     | 0.650608915 | 1.54E-75 |
| SRSF3  | ZNF207    | 0.650438972 | 1.73E-75 |
| SRSF6  | ASXL1     | 0.650309404 | 1.89E-75 |
| SRSF2  | PHF12     | 0.650307262 | 1.90E-75 |
| SRSF10 | HNRNPA2B1 | 0.65026409  | 1.95E-75 |
| SRSF1  | PRKCI     | 0.650210232 | 2.03E-75 |
| SRSF10 | RFWD3     | 0.650188865 | 2.06E-75 |
| SRSF1  | CDK1      | 0.650178807 | 2.07E-75 |
| SRSF3  | DUSP12    | 0.650110468 | 2.17E-75 |
| SRSF1  | HDAC2     | 0.650103192 | 2.19E-75 |
| SRSF2  | PLK4      | 0.64993604  | 2.45E-75 |
| SRSF2  | PMS1      | 0.6499082   | 2.50E-75 |
| SRSF1  | KIF15     | 0.649714256 | 2.86E-75 |

|        |         |             |          |
|--------|---------|-------------|----------|
| SRSF2  | ACTL6A  | 0.649631261 | 3.03E-75 |
| SRSF9  | MAPRE1  | 0.649451243 | 3.43E-75 |
| SRSF3  | EWSR1   | 0.649432991 | 3.48E-75 |
| SRSF10 | IQCB1   | 0.649366481 | 3.64E-75 |
| SRSF2  | TOPBP1  | 0.649309708 | 3.79E-75 |
| SRSF1  | FBXO5   | 0.649282512 | 3.86E-75 |
| SRSF1  | TTK     | 0.649277269 | 3.87E-75 |
| SRSF3  | SNRPD1  | 0.649264093 | 3.91E-75 |
| SRSF9  | ECT2    | 0.649125247 | 4.30E-75 |
| SRSF11 | PNN     | 0.649005953 | 4.67E-75 |
| SRSF1  | CCDC14  | 0.648251225 | 7.87E-75 |
| SRSF1  | FANCG   | 0.648138729 | 8.50E-75 |
| SRSF1  | POLG2   | 0.648113883 | 8.65E-75 |
| SRSF9  | CSNK2A1 | 0.64804671  | 9.06E-75 |
| SRSF2  | SF3B1   | 0.647865738 | 1.03E-74 |
| SRSF1  | RFC4    | 0.647821419 | 1.06E-74 |
| SRSF10 | IFT80   | 0.64774195  | 1.12E-74 |
| SRSF1  | XPO1    | 0.647731493 | 1.13E-74 |
| SRSF4  | EYA3    | 0.64753485  | 1.29E-74 |
| SRSF9  | ZNF664  | 0.647457918 | 1.36E-74 |
| SRSF1  | SENP1   | 0.647416187 | 1.40E-74 |
| SRSF7  | RBM39   | 0.64741231  | 1.40E-74 |
| SRSF10 | IKZF4   | 0.647117704 | 1.72E-74 |
| SRSF1  | RYK     | 0.647098178 | 1.74E-74 |
| SRSF9  | NUP107  | 0.647084567 | 1.75E-74 |
| SRSF9  | ARPC2   | 0.646972215 | 1.90E-74 |
| SRSF11 | LRRC40  | 0.646827313 | 2.09E-74 |
| SRSF1  | ADNP    | 0.646799662 | 2.13E-74 |
| SRSF2  | FANCG   | 0.64676081  | 2.19E-74 |
| SRSF10 | THRAP3  | 0.646665868 | 2.34E-74 |
| SRSF11 | YTHDC1  | 0.646615504 | 2.42E-74 |
| SRSF3  | LMNB2   | 0.646489321 | 2.64E-74 |
| SRSF1  | COMMD2  | 0.646424864 | 2.76E-74 |
| SRSF1  | THOC1   | 0.646392207 | 2.82E-74 |
| SRSF2  | FOXK2   | 0.646345579 | 2.91E-74 |
| SRSF7  | PMS1    | 0.646320104 | 2.96E-74 |
| SRSF1  | CDC6    | 0.646293988 | 3.02E-74 |
| SRSF3  | BRIX1   | 0.64625794  | 3.09E-74 |
| SRSF6  | DMTF1   | 0.646184073 | 3.25E-74 |
| SRSF9  | UTP20   | 0.646159142 | 3.31E-74 |
| SRSF9  | HNRNPR  | 0.646157353 | 3.31E-74 |
| SRSF9  | SNRNP40 | 0.646115355 | 3.41E-74 |
| SRSF2  | SMARCD1 | 0.646094625 | 3.46E-74 |
| SRSF11 | TTC14   | 0.64604693  | 3.57E-74 |
| SRSF4  | CDK11B  | 0.646040108 | 3.59E-74 |
| SRSF10 | SCLT1   | 0.646036941 | 3.60E-74 |
| SRSF2  | CBX1    | 0.645901747 | 3.94E-74 |
| SRSF9  | ANKLE2  | 0.645822485 | 4.16E-74 |
| SRSF9  | TRIP13  | 0.645798122 | 4.23E-74 |
| SRSF3  | UBA2    | 0.645787219 | 4.26E-74 |
| SRSF10 | TAF1B   | 0.645782266 | 4.28E-74 |

|        |         |             |          |
|--------|---------|-------------|----------|
| SRSF2  | SRRT    | 0.645637202 | 4.72E-74 |
| SRSF1  | ABI2    | 0.645636237 | 4.73E-74 |
| SRSF2  | RBM17   | 0.645593145 | 4.87E-74 |
| SRSF2  | CRLF3   | 0.645532062 | 5.08E-74 |
| SRSF1  | LMNB2   | 0.645480702 | 5.26E-74 |
| SRSF3  | NOP58   | 0.645421097 | 5.48E-74 |
| SRSF1  | MKI67   | 0.645345531 | 5.76E-74 |
| SRSF1  | NEDD1   | 0.64528711  | 6.00E-74 |
| SRSF1  | ACIN1   | 0.645173351 | 6.48E-74 |
| SRSF10 | BAZ2A   | 0.645082799 | 6.89E-74 |
| SRSF1  | RAD54L  | 0.64491379  | 7.74E-74 |
| SRSF11 | ASXL1   | 0.644913534 | 7.74E-74 |
| SRSF1  | MCM10   | 0.644886982 | 7.88E-74 |
| SRSF11 | PMS1    | 0.644879297 | 7.92E-74 |
| SRSF11 | POGZ    | 0.644877728 | 7.93E-74 |
| SRSF1  | SKA3    | 0.644869747 | 7.97E-74 |
| SRSF7  | THUMPD2 | 0.644843027 | 8.12E-74 |
| SRSF10 | CPSF6   | 0.644833312 | 8.17E-74 |
| SRSF3  | RCC2    | 0.644715473 | 8.85E-74 |
| SRSF1  | POGK    | 0.644688111 | 9.02E-74 |
| SRSF1  | QSER1   | 0.644684258 | 9.04E-74 |
| SRSF1  | HAUS3   | 0.644662102 | 9.18E-74 |
| SRSF2  | WDHD1   | 0.644389513 | 1.10E-73 |
| SRSF7  | HNRNPD  | 0.644381879 | 1.11E-73 |
| SRSF1  | CENPO   | 0.644298121 | 1.18E-73 |
| SRSF9  | LMNB2   | 0.644240478 | 1.22E-73 |
| SRSF10 | TDG     | 0.644178441 | 1.28E-73 |
| SRSF11 | ZNF337  | 0.6439611   | 1.48E-73 |
| SRSF9  | MCM2    | 0.643851604 | 1.59E-73 |
| SRSF10 | DNMT1   | 0.643835491 | 1.61E-73 |
| SRSF1  | CKAP5   | 0.643718754 | 1.74E-73 |
| SRSF11 | RICTOR  | 0.643647009 | 1.83E-73 |
| SRSF9  | PPP5C   | 0.643574462 | 1.92E-73 |
| SRSF1  | ZWINT   | 0.643505777 | 2.01E-73 |
| SRSF1  | PTMA    | 0.643406217 | 2.15E-73 |
| SRSF1  | FANCI   | 0.643283115 | 2.34E-73 |
| SRSF11 | BRD1    | 0.643239462 | 2.41E-73 |
| SRSF1  | ORC2    | 0.643176912 | 2.51E-73 |
| SRSF2  | KIF11   | 0.643111201 | 2.63E-73 |
| SRSF2  | CCDC14  | 0.642991511 | 2.85E-73 |
| SRSF2  | ATXN7L3 | 0.642949285 | 2.93E-73 |
| SRSF11 | ZNF621  | 0.64286696  | 3.10E-73 |
| SRSF10 | HNRNPK  | 0.642858605 | 3.12E-73 |
| SRSF1  | NEK2    | 0.64285207  | 3.13E-73 |
| SRSF2  | SMPD4   | 0.642830497 | 3.18E-73 |
| SRSF1  | INCENP  | 0.642823362 | 3.19E-73 |
| SRSF1  | DHX9    | 0.642804458 | 3.23E-73 |
| SRSF1  | MCM2    | 0.642759084 | 3.33E-73 |
| SRSF1  | SETD5   | 0.642735201 | 3.39E-73 |
| SRSF10 | ETNK1   | 0.642526113 | 3.90E-73 |
| SRSF1  | MASTL   | 0.642519077 | 3.92E-73 |



|        |          |             |          |
|--------|----------|-------------|----------|
| SRSF11 | NAA40    | 0.642518667 | 3.92E-73 |
| SRSF1  | CHTOP    | 0.642431583 | 4.16E-73 |
| SRSF2  | RFWD3    | 0.64240826  | 4.22E-73 |
| SRSF10 | CDC7     | 0.642366634 | 4.34E-73 |
| SRSF1  | PPHLN1   | 0.64235191  | 4.39E-73 |
| SRSF1  | FUBP1    | 0.642255902 | 4.68E-73 |
| SRSF9  | GIN5     | 0.641988079 | 5.60E-73 |
| SRSF11 | LENG8    | 0.641704426 | 6.78E-73 |
| SRSF9  | LLPH     | 0.641442718 | 8.09E-73 |
| SRSF10 | TCERG1   | 0.641359667 | 8.55E-73 |
| SRSF9  | NCAPD2   | 0.641352789 | 8.59E-73 |
| SRSF9  | BUB1B    | 0.641341911 | 8.65E-73 |
| SRSF6  | ZNF638   | 0.641328523 | 8.73E-73 |
| SRSF10 | MIER1    | 0.641305786 | 8.87E-73 |
| SRSF9  | FOXM1    | 0.641304188 | 8.88E-73 |
| SRSF11 | BAZ2A    | 0.641257173 | 9.16E-73 |
| SRSF2  | ORC2     | 0.641232107 | 9.32E-73 |
| SRSF9  | ARL1     | 0.641202704 | 9.50E-73 |
| SRSF2  | NCAPD2   | 0.641127983 | 9.99E-73 |
| SRSF1  | LARP4B   | 0.641084898 | 1.03E-72 |
| SRSF1  | BUB3     | 0.640907515 | 1.16E-72 |
| SRSF1  | ORC1     | 0.640902408 | 1.16E-72 |
| SRSF9  | HNRNPA0  | 0.640887565 | 1.17E-72 |
| SRSF10 | C18orf25 | 0.640776263 | 1.26E-72 |
| SRSF1  | CDCA8    | 0.64068809  | 1.34E-72 |
| SRSF1  | CNOT3    | 0.640657371 | 1.37E-72 |
| SRSF10 | SART3    | 0.640645457 | 1.38E-72 |
| SRSF1  | PAPOLG   | 0.640578062 | 1.44E-72 |
| SRSF1  | PRR11    | 0.640548732 | 1.47E-72 |
| SRSF1  | USP39    | 0.640539676 | 1.48E-72 |
| SRSF3  | NRM      | 0.640489183 | 1.53E-72 |
| SRSF9  | NIPA2    | 0.640487334 | 1.53E-72 |
| SRSF1  | CDC27    | 0.640246333 | 1.80E-72 |
| SRSF1  | RAD18    | 0.640238957 | 1.81E-72 |
| SRSF2  | PIF1     | 0.640107052 | 1.98E-72 |
| SRSF1  | HSF2     | 0.640005174 | 2.12E-72 |
| SRSF10 | YTHDF2   | 0.639966254 | 2.17E-72 |
| SRSF1  | EXO1     | 0.639900335 | 2.27E-72 |
| SRSF9  | CCT4     | 0.639786628 | 2.45E-72 |
| SRSF1  | PMS1     | 0.63978431  | 2.46E-72 |
| SRSF6  | BRD1     | 0.63977517  | 2.47E-72 |
| SRSF3  | FANCG    | 0.639676889 | 2.64E-72 |
| SRSF10 | PHF6     | 0.639663699 | 2.66E-72 |
| SRSF1  | PLK1     | 0.639581404 | 2.81E-72 |
| SRSF1  | FANCF    | 0.639513837 | 2.94E-72 |
| SRSF1  | CENPA    | 0.639410238 | 3.15E-72 |
| SRSF9  | PDIA6    | 0.639355658 | 3.27E-72 |
| SRSF10 | FBXO30   | 0.639267998 | 3.47E-72 |
| SRSF11 | TET3     | 0.63923901  | 3.53E-72 |
| SRSF1  | EZH2     | 0.639145956 | 3.76E-72 |
| SRSF11 | TRIM33   | 0.639126316 | 3.81E-72 |

|        |          |             |          |
|--------|----------|-------------|----------|
| SRSF11 | OGT      | 0.639081977 | 3.92E-72 |
| SRSF2  | UBE2O    | 0.63906233  | 3.97E-72 |
| SRSF1  | DROSHA   | 0.638895875 | 4.44E-72 |
| SRSF10 | FANCL    | 0.63886874  | 4.52E-72 |
| SRSF11 | ZNF292   | 0.638656294 | 5.21E-72 |
| SRSF10 | ARL6IP6  | 0.638593577 | 5.43E-72 |
| SRSF10 | INO80D   | 0.63858989  | 5.44E-72 |
| SRSF11 | MAPK8IP3 | 0.638552538 | 5.58E-72 |
| SRSF1  | HNRNPH1  | 0.638529473 | 5.67E-72 |
| SRSF11 | ZMYM6    | 0.638501142 | 5.77E-72 |
| SRSF11 | PPP1R12A | 0.638493841 | 5.80E-72 |
| SRSF4  | FBXO42   | 0.638357367 | 6.35E-72 |
| SRSF7  | FUS      | 0.638052429 | 7.78E-72 |
| SRSF1  | HMGB2    | 0.637973097 | 8.20E-72 |
| SRSF2  | STRADA   | 0.637936644 | 8.40E-72 |
| SRSF10 | TMX3     | 0.637933119 | 8.42E-72 |
| SRSF1  | ZNF639   | 0.637845423 | 8.92E-72 |
| SRSF1  | MSL2     | 0.637843993 | 8.93E-72 |
| SRSF10 | SMG1     | 0.637773488 | 9.36E-72 |
| SRSF3  | SUMO2    | 0.637702344 | 9.81E-72 |
| SRSF1  | RACGAP1  | 0.637623151 | 1.03E-71 |
| SRSF1  | NUP188   | 0.637618358 | 1.04E-71 |
| SRSF1  | SUZ12    | 0.637591923 | 1.06E-71 |
| SRSF3  | NOL7     | 0.637539187 | 1.09E-71 |
| SRSF9  | NIF3L1   | 0.637532031 | 1.10E-71 |
| SRSF10 | CBFB     | 0.63734638  | 1.24E-71 |
| SRSF1  | FNBP4    | 0.637299499 | 1.28E-71 |
| SRSF9  | C12orf49 | 0.637164198 | 1.40E-71 |
| SRSF9  | RCN2     | 0.637116004 | 1.45E-71 |
| SRSF10 | USP24    | 0.637066729 | 1.49E-71 |
| SRSF10 | ZNF638   | 0.637002616 | 1.56E-71 |
| SRSF2  | TADA2A   | 0.636950059 | 1.61E-71 |
| SRSF1  | NDC80    | 0.636796493 | 1.79E-71 |
| SRSF9  | RACGAP1  | 0.636682133 | 1.93E-71 |
| SRSF9  | HNRNPL   | 0.63660599  | 2.02E-71 |
| SRSF11 | WSB1     | 0.636551858 | 2.10E-71 |
| SRSF10 | TOPBP1   | 0.6365238   | 2.14E-71 |
| SRSF2  | HAUS5    | 0.636497786 | 2.17E-71 |
| SRSF2  | TTF2     | 0.636482801 | 2.20E-71 |
| SRSF11 | DYNC1LI2 | 0.636390015 | 2.33E-71 |
| SRSF10 | MBNL1    | 0.636355275 | 2.39E-71 |
| SRSF3  | SNRPB2   | 0.636305321 | 2.47E-71 |
| SRSF1  | RPIA     | 0.636284679 | 2.50E-71 |
| SRSF2  | NCBP2    | 0.636205873 | 2.64E-71 |
| SRSF2  | SUMO2    | 0.636053418 | 2.91E-71 |
| SRSF2  | ZNF248   | 0.635984368 | 3.05E-71 |
| SRSF10 | PRPF39   | 0.635917619 | 3.19E-71 |
| SRSF11 | ZC3H11A  | 0.63590116  | 3.22E-71 |
| SRSF11 | MED13L   | 0.635876857 | 3.27E-71 |
| SRSF6  | TCERG1   | 0.6358287   | 3.38E-71 |
| SRSF10 | APAF1    | 0.635758117 | 3.54E-71 |

|        |          |             |          |
|--------|----------|-------------|----------|
| SRSF1  | RAD1     | 0.635753256 | 3.55E-71 |
| SRSF2  | XRCC3    | 0.635714243 | 3.64E-71 |
| SRSF2  | LY6G5B   | 0.635709271 | 3.66E-71 |
| SRSF1  | PHF12    | 0.635575985 | 3.99E-71 |
| SRSF10 | FBXO11   | 0.635543413 | 4.08E-71 |
| SRSF1  | CBFB     | 0.635473598 | 4.27E-71 |
| SRSF2  | NUP43    | 0.635469578 | 4.28E-71 |
| SRSF11 | CEP192   | 0.635402242 | 4.47E-71 |
| SRSF1  | UTP6     | 0.635398362 | 4.48E-71 |
| SRSF2  | RAD51D   | 0.635253888 | 4.93E-71 |
| SRSF1  | RALGAPB  | 0.635192277 | 5.13E-71 |
| SRSF3  | CLIC1    | 0.63511926  | 5.39E-71 |
| SRSF1  | CHAF1B   | 0.634969977 | 5.94E-71 |
| SRSF11 | FAM76B   | 0.634873722 | 6.33E-71 |
| SRSF10 | FGFR1OP2 | 0.6348308   | 6.51E-71 |
| SRSF3  | IQCB1    | 0.634802997 | 6.63E-71 |
| SRSF10 | CREB1    | 0.634780284 | 6.73E-71 |
| SRSF10 | GPD2     | 0.634768986 | 6.78E-71 |
| SRSF9  | TMED2    | 0.634743621 | 6.89E-71 |
| SRSF1  | MCM4     | 0.634609199 | 7.53E-71 |
| SRSF9  | USP39    | 0.63456132  | 7.77E-71 |
| SRSF2  | CPSF6    | 0.634540511 | 7.87E-71 |
| SRSF1  | FUS      | 0.634473644 | 8.22E-71 |
| SRSF2  | GIN51    | 0.634463337 | 8.28E-71 |
| SRSF10 | MAP4K5   | 0.634434913 | 8.44E-71 |
| SRSF3  | SET      | 0.634399922 | 8.63E-71 |
| SRSF1  | NAA25    | 0.63436105  | 8.85E-71 |
| SRSF10 | NEMF     | 0.634356709 | 8.88E-71 |
| SRSF11 | CCAR1    | 0.634350457 | 8.91E-71 |
| SRSF2  | PPHLN1   | 0.634297596 | 9.23E-71 |
| SRSF1  | HNRNPC   | 0.634275894 | 9.36E-71 |
| SRSF3  | MTF2     | 0.634239888 | 9.58E-71 |
| SRSF10 | CGGBP1   | 0.634227335 | 9.66E-71 |
| SRSF9  | HDAC2    | 0.634141955 | 1.02E-70 |
| SRSF9  | HMGN4    | 0.634107479 | 1.05E-70 |
| SRSF7  | SUPT7L   | 0.634013467 | 1.11E-70 |
| SRSF2  | RNF34    | 0.633930842 | 1.17E-70 |
| SRSF1  | SP1      | 0.633868142 | 1.22E-70 |
| SRSF1  | GPSM2    | 0.633706583 | 1.36E-70 |
| SRSF2  | CEP55    | 0.633637701 | 1.42E-70 |
| SRSF1  | UBE2N    | 0.633458583 | 1.60E-70 |
| SRSF9  | EIF2B1   | 0.633372229 | 1.69E-70 |
| SRSF3  | SNRPG    | 0.633245062 | 1.83E-70 |
| SRSF10 | TMF1     | 0.633208428 | 1.88E-70 |
| SRSF9  | SF3B2    | 0.63318599  | 1.91E-70 |
| SRSF3  | ZBTB12   | 0.633157518 | 1.94E-70 |
| SRSF2  | MASTL    | 0.633156658 | 1.94E-70 |
| SRSF6  | HNRNPH1  | 0.633154098 | 1.95E-70 |
| SRSF10 | PMS1     | 0.633025472 | 2.12E-70 |
| SRSF11 | SENP7    | 0.63295152  | 2.22E-70 |
| SRSF1  | SMURF2   | 0.632897146 | 2.30E-70 |

|        |           |             |          |
|--------|-----------|-------------|----------|
| SRSF1  | DTL       | 0.632831464 | 2.40E-70 |
| SRSF9  | RAD51     | 0.632785809 | 2.47E-70 |
| SRSF1  | NUP85     | 0.632738637 | 2.55E-70 |
| SRSF1  | KIF14     | 0.632721394 | 2.58E-70 |
| SRSF3  | HNRNPA2B1 | 0.632684598 | 2.64E-70 |
| SRSF11 | RBAK      | 0.632577834 | 2.83E-70 |
| SRSF7  | PRPF39    | 0.632572936 | 2.84E-70 |
| SRSF10 | CTDSPL2   | 0.632563793 | 2.86E-70 |
| SRSF9  | NCBP2     | 0.63251271  | 2.96E-70 |
| SRSF1  | SF3B1     | 0.632511468 | 2.96E-70 |
| SRSF2  | PTMA      | 0.632494378 | 2.99E-70 |
| SRSF10 | SPIN1     | 0.632490514 | 3.00E-70 |
| SRSF11 | IKZF4     | 0.632377062 | 3.23E-70 |
| SRSF2  | C4orf46   | 0.632376718 | 3.23E-70 |
| SRSF6  | PRPF38B   | 0.6323345   | 3.32E-70 |
| SRSF10 | USP1      | 0.632322886 | 3.34E-70 |
| SRSF2  | STIL      | 0.632240183 | 3.53E-70 |
| SRSF10 | CEP135    | 0.632148546 | 3.74E-70 |
| SRSF11 | ELF2      | 0.632029558 | 4.04E-70 |
| SRSF9  | KIF4A     | 0.632029334 | 4.05E-70 |
| SRSF11 | UBN2      | 0.631941209 | 4.28E-70 |
| SRSF1  | TAF4      | 0.631934963 | 4.30E-70 |
| SRSF2  | RAD51AP1  | 0.63192468  | 4.33E-70 |
| SRSF6  | CCNT2     | 0.631903113 | 4.39E-70 |
| SRSF9  | ARF3      | 0.631895736 | 4.41E-70 |
| SRSF9  | PSME3     | 0.63185191  | 4.54E-70 |
| SRSF7  | ACIN1     | 0.631842372 | 4.57E-70 |
| SRSF10 | SCAF8     | 0.631821055 | 4.63E-70 |
| SRSF9  | PSMD9     | 0.631722999 | 4.93E-70 |
| SRSF4  | PHACTR4   | 0.631711319 | 4.97E-70 |
| SRSF3  | NAP1L1    | 0.631545724 | 5.53E-70 |
| SRSF3  | SSB       | 0.631540652 | 5.55E-70 |
| SRSF11 | FBXO11    | 0.63147448  | 5.80E-70 |
| SRSF1  | RNF44     | 0.631390261 | 6.12E-70 |
| SRSF9  | EIF4A3    | 0.631326171 | 6.38E-70 |
| SRSF1  | EED       | 0.63129675  | 6.50E-70 |
| SRSF9  | PGAM1     | 0.631260419 | 6.66E-70 |
| SRSF1  | CCNF      | 0.63121154  | 6.87E-70 |
| SRSF3  | CBX1      | 0.631197283 | 6.93E-70 |
| SRSF10 | HNRNPH3   | 0.631162658 | 7.09E-70 |
| SRSF9  | YEATS2    | 0.631123021 | 7.28E-70 |
| SRSF9  | RNF41     | 0.631036344 | 7.70E-70 |
| SRSF2  | USP21     | 0.631032854 | 7.71E-70 |
| SRSF1  | RBM14     | 0.630946858 | 8.15E-70 |
| SRSF1  | CSNK1D    | 0.630864696 | 8.60E-70 |
| SRSF2  | SASS6     | 0.630802929 | 8.95E-70 |
| SRSF11 | SLTM      | 0.63073935  | 9.32E-70 |
| SRSF2  | CDCA8     | 0.630710802 | 9.50E-70 |
| SRSF11 | MAU2      | 0.630688737 | 9.63E-70 |
| SRSF1  | HNRNPA0   | 0.630454118 | 1.12E-69 |
| SRSF2  | KIF2C     | 0.63043743  | 1.13E-69 |

|        |          |             |          |
|--------|----------|-------------|----------|
| SRSF1  | MAD2L1   | 0.630372526 | 1.18E-69 |
| SRSF11 | ATM      | 0.630316432 | 1.22E-69 |
| SRSF2  | DVL3     | 0.6302461   | 1.28E-69 |
| SRSF7  | HNRNPA3  | 0.630226703 | 1.30E-69 |
| SRSF1  | MZT1     | 0.630161484 | 1.35E-69 |
| SRSF9  | NONO     | 0.630122567 | 1.39E-69 |
| SRSF11 | OTUD3    | 0.630099006 | 1.41E-69 |
| SRSF10 | SOC5     | 0.630053164 | 1.45E-69 |
| SRSF11 | TRA2A    | 0.630010108 | 1.49E-69 |
| SRSF2  | NUP188   | 0.629999314 | 1.50E-69 |
| SRSF3  | RAN      | 0.629968846 | 1.53E-69 |
| SRSF1  | RBM12    | 0.629926702 | 1.57E-69 |
| SRSF1  | CKAP2L   | 0.629840269 | 1.66E-69 |
| SRSF11 | ZFC3H1   | 0.629775928 | 1.73E-69 |
| SRSF10 | ZBTB11   | 0.629729414 | 1.79E-69 |
| SRSF9  | MAD2L1   | 0.629710484 | 1.81E-69 |
| SRSF1  | VEZF1    | 0.62970608  | 1.81E-69 |
| SRSF10 | MIS18BP1 | 0.629666668 | 1.86E-69 |
| SRSF1  | PALB2    | 0.629518689 | 2.05E-69 |
| SRSF4  | PPP1R8   | 0.629491229 | 2.08E-69 |
| SRSF2  | HSF2     | 0.62943875  | 2.16E-69 |
| SRSF9  | KIF23    | 0.6293626   | 2.26E-69 |
| SRSF10 | PHF12    | 0.629273994 | 2.40E-69 |
| SRSF11 | IQCB1    | 0.629252093 | 2.43E-69 |
| SRSF1  | PCNP     | 0.629251454 | 2.43E-69 |
| SRSF2  | C1orf52  | 0.629231486 | 2.46E-69 |
| SRSF1  | ATXN7L3  | 0.629205158 | 2.50E-69 |
| SRSF2  | GTSE1    | 0.629199344 | 2.51E-69 |
| SRSF2  | COIL     | 0.629116343 | 2.65E-69 |
| SRSF1  | RIF1     | 0.629109293 | 2.66E-69 |
| SRSF1  | PRPF40A  | 0.629094368 | 2.69E-69 |
| SRSF9  | LRRC59   | 0.628931397 | 2.98E-69 |
| SRSF2  | ZWINT    | 0.628803521 | 3.24E-69 |
| SRSF10 | FBXO5    | 0.628634239 | 3.61E-69 |
| SRSF9  | NUP205   | 0.628587831 | 3.72E-69 |
| SRSF9  | PGAM5    | 0.628450164 | 4.06E-69 |
| SRSF10 | ZNF567   | 0.628427674 | 4.12E-69 |
| SRSF11 | CEP290   | 0.628289047 | 4.50E-69 |
| SRSF10 | ZCCHC8   | 0.628248362 | 4.62E-69 |
| SRSF10 | TIA1     | 0.62821177  | 4.73E-69 |
| SRSF10 | METTL4   | 0.628199551 | 4.77E-69 |
| SRSF1  | DNAJC9   | 0.628132814 | 4.98E-69 |
| SRSF3  | TUBB     | 0.628080618 | 5.15E-69 |
| SRSF2  | DDX11    | 0.627934485 | 5.65E-69 |
| SRSF10 | CWC22    | 0.627872916 | 5.88E-69 |
| SRSF3  | WDHD1    | 0.627846061 | 5.98E-69 |
| SRSF1  | FOXO1    | 0.627790113 | 6.20E-69 |
| SRSF1  | STK4     | 0.627735994 | 6.42E-69 |
| SRSF2  | MMS22L   | 0.627691174 | 6.60E-69 |
| SRSF10 | MED13L   | 0.627615462 | 6.93E-69 |
| SRSF1  | ZMYM4    | 0.627611088 | 6.95E-69 |

|        |          |             |          |
|--------|----------|-------------|----------|
| SRSF3  | NCBP2    | 0.627583095 | 7.07E-69 |
| SRSF10 | SENK6    | 0.627573463 | 7.12E-69 |
| SRSF9  | HAT1     | 0.627549808 | 7.23E-69 |
| SRSF1  | SPC25    | 0.627520763 | 7.36E-69 |
| SRSF9  | PIGS     | 0.627518149 | 7.37E-69 |
| SRSF9  | PPM1G    | 0.627512671 | 7.40E-69 |
| SRSF2  | FANCI    | 0.627407677 | 7.91E-69 |
| SRSF11 | ATAD2B   | 0.627330058 | 8.31E-69 |
| SRSF11 | CLK1     | 0.627324851 | 8.34E-69 |
| SRSF11 | ANKRD10  | 0.62731156  | 8.41E-69 |
| SRSF11 | ZBTB11   | 0.627282013 | 8.57E-69 |
| SRSF3  | RFC4     | 0.627262236 | 8.68E-69 |
| SRSF1  | C18orf54 | 0.627250517 | 8.75E-69 |
| SRSF2  | METTL3   | 0.627244735 | 8.78E-69 |
| SRSF2  | NAA25    | 0.627233033 | 8.84E-69 |
| SRSF11 | ZSCAN30  | 0.627223481 | 8.90E-69 |
| SRSF10 | SMARCA1  | 0.627210326 | 8.97E-69 |
| SRSF1  | DNAJC10  | 0.627166926 | 9.22E-69 |
| SRSF1  | KIF20B   | 0.62706474  | 9.84E-69 |
| SRSF11 | ZNF224   | 0.626943512 | 1.06E-68 |
| SRSF1  | ENOPH1   | 0.626933765 | 1.07E-68 |
| SRSF10 | RERE     | 0.626858237 | 1.12E-68 |
| SRSF2  | IFT80    | 0.626839409 | 1.14E-68 |
| SRSF1  | C5orf34  | 0.626822708 | 1.15E-68 |
| SRSF1  | ZMYM1    | 0.626701034 | 1.24E-68 |
| SRSF1  | JRKL     | 0.626530556 | 1.38E-68 |
| SRSF2  | ORC1     | 0.626469466 | 1.44E-68 |
| SRSF10 | RNF34    | 0.626372384 | 1.53E-68 |
| SRSF9  | PRMT1    | 0.626299206 | 1.60E-68 |
| SRSF11 | ORC2     | 0.626229516 | 1.67E-68 |
| SRSF11 | CASP8AP2 | 0.626058565 | 1.87E-68 |
| SRSF7  | EWSR1    | 0.625810148 | 2.19E-68 |
| SRSF1  | TMEM237  | 0.625802097 | 2.20E-68 |
| SRSF1  | SUDS3    | 0.625762601 | 2.25E-68 |
| SRSF1  | ZNF169   | 0.625726744 | 2.30E-68 |
| SRSF11 | ZNF236   | 0.625700861 | 2.34E-68 |
| SRSF2  | FUS      | 0.625664653 | 2.40E-68 |
| SRSF10 | DMTF1    | 0.625476586 | 2.70E-68 |
| SRSF3  | SNRNP40  | 0.625475224 | 2.70E-68 |
| SRSF1  | SMPD4    | 0.625419939 | 2.80E-68 |
| SRSF2  | SLC25A19 | 0.625373313 | 2.88E-68 |
| SRSF1  | KIFC1    | 0.625366866 | 2.89E-68 |
| SRSF2  | KIF18A   | 0.625295329 | 3.03E-68 |
| SRSF11 | MSL2     | 0.625203671 | 3.21E-68 |
| SRSF10 | LEMD3    | 0.625141236 | 3.34E-68 |
| SRSF3  | RAE1     | 0.625107503 | 3.41E-68 |
| SRSF1  | CCDC93   | 0.625073615 | 3.48E-68 |
| SRSF1  | NPEPPS   | 0.625058857 | 3.52E-68 |
| SRSF10 | EP400    | 0.625048878 | 3.54E-68 |
| SRSF2  | UHRF1    | 0.62503978  | 3.56E-68 |
| SRSF10 | RSRC2    | 0.624998342 | 3.65E-68 |

|        |         |             |          |
|--------|---------|-------------|----------|
| SRSF1  | SLBP    | 0.624917855 | 3.85E-68 |
| SRSF7  | THOC1   | 0.624901435 | 3.89E-68 |
| SRSF9  | PRC1    | 0.624899586 | 3.89E-68 |
| SRSF10 | TARDBP  | 0.624863661 | 3.98E-68 |
| SRSF2  | ASXL1   | 0.624711853 | 4.38E-68 |
| SRSF11 | SMG1    | 0.624640821 | 4.58E-68 |
| SRSF1  | PIP5K1A | 0.624605994 | 4.68E-68 |
| SRSF1  | CENPL   | 0.624577207 | 4.77E-68 |
| SRSF2  | PRC1    | 0.624567148 | 4.80E-68 |
| SRSF10 | SCAF11  | 0.624427933 | 5.24E-68 |
| SRSF9  | INCENP  | 0.624412697 | 5.29E-68 |
| SRSF11 | CEP170  | 0.624362925 | 5.46E-68 |
| SRSF9  | MIS18A  | 0.624326957 | 5.58E-68 |
| SRSF6  | NCOA5   | 0.624315851 | 5.62E-68 |
| SRSF1  | OTUD3   | 0.624275334 | 5.77E-68 |
| SRSF10 | LUC7L3  | 0.624268464 | 5.79E-68 |
| SRSF3  | STMN1   | 0.624254325 | 5.85E-68 |
| SRSF1  | BPTF    | 0.62418529  | 6.11E-68 |
| SRSF1  | DUSP12  | 0.624150547 | 6.24E-68 |
| SRSF2  | USP36   | 0.624110443 | 6.40E-68 |
| SRSF1  | FAM72B  | 0.624101686 | 6.44E-68 |
| SRSF7  | NOP58   | 0.624100599 | 6.44E-68 |
| SRSF10 | XPO1    | 0.624098413 | 6.45E-68 |
| SRSF1  | TMEM39A | 0.624063031 | 6.60E-68 |
| SRSF10 | ZNF146  | 0.624052314 | 6.64E-68 |
| SRSF9  | MAZ     | 0.624014013 | 6.80E-68 |
| SRSF3  | ANKLE2  | 0.623886814 | 7.37E-68 |
| SRSF2  | NUSAP1  | 0.623807331 | 7.75E-68 |
| SRSF1  | R3HDM1  | 0.623746149 | 8.05E-68 |
| SRSF11 | PRPF4B  | 0.623743806 | 8.06E-68 |
| SRSF10 | C4orf46 | 0.62374251  | 8.07E-68 |
| SRSF9  | PTGES3  | 0.623738826 | 8.09E-68 |
| SRSF3  | PRR3    | 0.623665271 | 8.47E-68 |
| SRSF10 | STIL    | 0.623656807 | 8.52E-68 |
| SRSF6  | SF3B1   | 0.623610246 | 8.77E-68 |
| SRSF10 | OTUD4   | 0.623557507 | 9.07E-68 |
| SRSF3  | FANCI   | 0.623455515 | 9.67E-68 |
| SRSF10 | MDM1    | 0.623445321 | 9.73E-68 |
| SRSF9  | DHX9    | 0.62343294  | 9.81E-68 |
| SRSF3  | RBM12   | 0.623377529 | 1.02E-67 |
| SRSF10 | ZNF292  | 0.623291352 | 1.07E-67 |
| SRSF10 | SUDS3   | 0.623251726 | 1.10E-67 |
| SRSF3  | MITD1   | 0.623211069 | 1.13E-67 |
| SRSF1  | CAPZA1  | 0.623174648 | 1.15E-67 |
| SRSF9  | SPPL3   | 0.623169242 | 1.16E-67 |
| SRSF1  | HAUS5   | 0.623132817 | 1.18E-67 |
| SRSF3  | ADO     | 0.623084294 | 1.22E-67 |
| SRSF1  | DNA2    | 0.623060781 | 1.24E-67 |
| SRSF2  | UBA2    | 0.62303967  | 1.26E-67 |
| SRSF10 | HACE1   | 0.622966623 | 1.31E-67 |
| SRSF1  | RPE     | 0.622941432 | 1.34E-67 |

|        |           |             |          |
|--------|-----------|-------------|----------|
| SRSF3  | NCL       | 0.622930876 | 1.34E-67 |
| SRSF3  | ILF3      | 0.622879962 | 1.39E-67 |
| SRSF9  | KCTD10    | 0.622821183 | 1.44E-67 |
| SRSF9  | RAD51AP1  | 0.622715338 | 1.54E-67 |
| SRSF11 | DIP2A     | 0.622700833 | 1.55E-67 |
| SRSF2  | ZNF26     | 0.622648507 | 1.60E-67 |
| SRSF11 | SP1       | 0.622596484 | 1.66E-67 |
| SRSF1  | PTBP2     | 0.62254026  | 1.72E-67 |
| SRSF3  | METTL9    | 0.622484831 | 1.78E-67 |
| SRSF6  | ACIN1     | 0.622412001 | 1.86E-67 |
| SRSF3  | RBM17     | 0.622362013 | 1.92E-67 |
| SRSF1  | RUNDC1    | 0.622309716 | 1.98E-67 |
| SRSF1  | LIG1      | 0.622300956 | 2.00E-67 |
| SRSF1  | SEN5      | 0.622282114 | 2.02E-67 |
| SRSF2  | GGNBP2    | 0.622254596 | 2.05E-67 |
| SRSF1  | HNRNPK    | 0.622236575 | 2.08E-67 |
| SRSF1  | SUV39H2   | 0.622195416 | 2.13E-67 |
| SRSF3  | WDR75     | 0.622180716 | 2.15E-67 |
| SRSF3  | KIF11     | 0.622090097 | 2.28E-67 |
| SRSF1  | SMNDC1    | 0.6220885   | 2.28E-67 |
| SRSF2  | ARHGAP11A | 0.622000411 | 2.41E-67 |
| SRSF2  | TBP       | 0.621985581 | 2.43E-67 |
| SRSF3  | CCNB2     | 0.621920598 | 2.53E-67 |
| SRSF3  | KIF23     | 0.621919558 | 2.53E-67 |
| SRSF1  | USP1      | 0.621844198 | 2.66E-67 |
| SRSF11 | PHIP      | 0.621799657 | 2.73E-67 |
| SRSF1  | PDE7A     | 0.621794195 | 2.74E-67 |
| SRSF1  | DCAF7     | 0.621757471 | 2.80E-67 |
| SRSF3  | MTCH1     | 0.621707981 | 2.89E-67 |
| SRSF9  | SUV39H2   | 0.621628797 | 3.04E-67 |
| SRSF2  | MCM3      | 0.62162409  | 3.05E-67 |
| SRSF10 | RSBN1     | 0.621570247 | 3.15E-67 |
| SRSF10 | BRPF1     | 0.621562619 | 3.17E-67 |
| SRSF1  | ZRANB2    | 0.621560028 | 3.17E-67 |
| SRSF11 | HNRNPH3   | 0.621540399 | 3.21E-67 |
| SRSF2  | MELK      | 0.62148014  | 3.33E-67 |
| SRSF11 | PIP5K1A   | 0.621404198 | 3.50E-67 |
| SRSF9  | RAE1      | 0.621393072 | 3.52E-67 |
| SRSF9  | RFC4      | 0.621367028 | 3.58E-67 |
| SRSF2  | CENPF     | 0.621341317 | 3.64E-67 |
| SRSF1  | DDX52     | 0.621248933 | 3.85E-67 |
| SRSF2  | TTK       | 0.621245838 | 3.86E-67 |
| SRSF1  | LIN9      | 0.621229065 | 3.90E-67 |
| SRSF2  | MCM10     | 0.621227946 | 3.90E-67 |
| SRSF10 | TBK1      | 0.621223514 | 3.91E-67 |
| SRSF3  | TRIM59    | 0.621210136 | 3.95E-67 |
| SRSF1  | CAD       | 0.62119156  | 3.99E-67 |
| SRSF11 | SMCHD1    | 0.621049012 | 4.36E-67 |
| SRSF1  | DBF4      | 0.621017254 | 4.45E-67 |
| SRSF3  | TRIP4     | 0.620939479 | 4.67E-67 |
| SRSF9  | PCNP      | 0.620917839 | 4.73E-67 |



|        |         |             |          |
|--------|---------|-------------|----------|
| SRSF10 | PIP5K1A | 0.620905307 | 4.77E-67 |
| SRSF11 | UBXN4   | 0.62087376  | 4.87E-67 |
| SRSF1  | EP400   | 0.620837709 | 4.98E-67 |
| SRSF9  | DNMT1   | 0.620725992 | 5.33E-67 |
| SRSF11 | WDR47   | 0.62071694  | 5.36E-67 |
| SRSF1  | ZNF765  | 0.620712496 | 5.38E-67 |
| SRSF10 | ATR     | 0.620693121 | 5.44E-67 |
| SRSF10 | CBL     | 0.620684672 | 5.47E-67 |
| SRSF2  | ECT2    | 0.620630193 | 5.66E-67 |
| SRSF1  | CEP170  | 0.620469307 | 6.26E-67 |
| SRSF3  | EZH2    | 0.620454403 | 6.32E-67 |
| SRSF1  | DPF2    | 0.620437477 | 6.38E-67 |
| SRSF9  | GPN1    | 0.620425502 | 6.43E-67 |
| SRSF2  | KIF15   | 0.620409875 | 6.49E-67 |
| SRSF9  | LSM12   | 0.620395281 | 6.55E-67 |
| SRSF10 | ACTR2   | 0.620370096 | 6.66E-67 |
| SRSF3  | VRK1    | 0.620365073 | 6.68E-67 |
| SRSF9  | CDK2    | 0.620295525 | 6.97E-67 |
| SRSF1  | MAPRE1  | 0.620273156 | 7.07E-67 |
| SRSF1  | GGNBP2  | 0.620264595 | 7.11E-67 |
| SRSF10 | ELF2    | 0.62024631  | 7.19E-67 |
| SRSF9  | MCM4    | 0.620143003 | 7.67E-67 |
| SRSF9  | EFTUD2  | 0.620099716 | 7.87E-67 |
| SRSF2  | CHTF18  | 0.620039884 | 8.17E-67 |
| SRSF9  | EIF2S2  | 0.620035806 | 8.19E-67 |
| SRSF1  | CWC22   | 0.620023116 | 8.26E-67 |
| SRSF11 | ZNF567  | 0.619967013 | 8.55E-67 |
| SRSF3  | NCOA5   | 0.619937743 | 8.71E-67 |
| SRSF11 | ZNF131  | 0.619812863 | 9.41E-67 |
| SRSF9  | NUP93   | 0.619799987 | 9.49E-67 |
| SRSF7  | GTF3C2  | 0.619764075 | 9.70E-67 |
| SRSF3  | UTP6    | 0.619749229 | 9.79E-67 |
| SRSF2  | HNRNPU  | 0.619732403 | 9.89E-67 |
| SRSF3  | TMEM216 | 0.619726885 | 9.93E-67 |
| SRSF11 | ZBTB1   | 0.619657151 | 1.04E-66 |
| SRSF10 | HAUS6   | 0.619653087 | 1.04E-66 |
| SRSF2  | MTBP    | 0.61962403  | 1.06E-66 |
| SRSF9  | MCM10   | 0.619590513 | 1.08E-66 |
| SRSF1  | CNTRL   | 0.619408965 | 1.21E-66 |
| SRSF10 | CNTRL   | 0.619227595 | 1.35E-66 |
| SRSF11 | NEMF    | 0.619180942 | 1.39E-66 |
| SRSF9  | RRM1    | 0.619158369 | 1.41E-66 |
| SRSF10 | CTCF    | 0.619143809 | 1.42E-66 |
| SRSF2  | LIG1    | 0.619114759 | 1.45E-66 |
| SRSF11 | ZMYM2   | 0.619101318 | 1.46E-66 |
| SRSF10 | SASS6   | 0.619080363 | 1.48E-66 |
| SRSF10 | GIT2    | 0.618998802 | 1.56E-66 |
| SRSF11 | ILF3    | 0.618997929 | 1.56E-66 |
| SRSF11 | CEP95   | 0.618992049 | 1.56E-66 |
| SRSF9  | CKAP4   | 0.618945127 | 1.61E-66 |
| SRSF6  | REV1    | 0.618918555 | 1.64E-66 |

|        |          |             |          |
|--------|----------|-------------|----------|
| SRSF10 | ZNF207   | 0.618869456 | 1.69E-66 |
| SRSF1  | CBFA2T2  | 0.618856351 | 1.70E-66 |
| SRSF9  | RUVBL1   | 0.618812615 | 1.75E-66 |
| SRSF11 | CDK17    | 0.618803343 | 1.76E-66 |
| SRSF1  | ZNF519   | 0.618780795 | 1.78E-66 |
| SRSF10 | MEX3C    | 0.618758195 | 1.81E-66 |
| SRSF3  | BTF3L4   | 0.61872574  | 1.85E-66 |
| SRSF3  | LSM2     | 0.618680646 | 1.90E-66 |
| SRSF1  | DLGAP5   | 0.61865117  | 1.93E-66 |
| SRSF3  | NRF1     | 0.61862883  | 1.96E-66 |
| SRSF3  | FBXO5    | 0.618555512 | 2.05E-66 |
| SRSF1  | EWSR1    | 0.618539845 | 2.07E-66 |
| SRSF3  | LMNB1    | 0.618474838 | 2.15E-66 |
| SRSF2  | WTAP     | 0.618473535 | 2.16E-66 |
| SRSF1  | CENPH    | 0.618468552 | 2.16E-66 |
| SRSF1  | RSRC2    | 0.61846     | 2.17E-66 |
| SRSF7  | TCERG1   | 0.618437824 | 2.20E-66 |
| SRSF1  | TADA2A   | 0.618392997 | 2.27E-66 |
| SRSF3  | TTF1     | 0.618377869 | 2.29E-66 |
| SRSF10 | C1orf109 | 0.618345892 | 2.33E-66 |
| SRSF12 | BEND3    | 0.618214086 | 2.53E-66 |
| SRSF10 | CEP85    | 0.618174284 | 2.59E-66 |
| SRSF1  | G2E3     | 0.618050571 | 2.80E-66 |
| SRSF10 | ATAD5    | 0.617904204 | 3.06E-66 |
| SRSF9  | UBE2Z    | 0.617862021 | 3.14E-66 |
| SRSF11 | AGAP6    | 0.61778763  | 3.29E-66 |
| SRSF2  | SPATS2   | 0.617760479 | 3.35E-66 |
| SRSF10 | PCNP     | 0.617749199 | 3.37E-66 |
| SRSF1  | UBE2Z    | 0.617748155 | 3.37E-66 |
| SRSF11 | ZC3H7A   | 0.617708572 | 3.46E-66 |
| SRSF9  | UBA2     | 0.617533749 | 3.85E-66 |
| SRSF3  | NFYA     | 0.617521434 | 3.88E-66 |
| SRSF1  | SMARCE1  | 0.617425226 | 4.11E-66 |
| SRSF1  | USP21    | 0.617348096 | 4.31E-66 |
| SRSF9  | MYBL2    | 0.617299945 | 4.44E-66 |
| SRSF9  | MCM3     | 0.617292611 | 4.46E-66 |
| SRSF11 | SCMH1    | 0.61728024  | 4.50E-66 |
| SRSF2  | CAD      | 0.617191698 | 4.75E-66 |
| SRSF7  | PTMA     | 0.617181124 | 4.78E-66 |
| SRSF10 | WDR47    | 0.617158847 | 4.85E-66 |
| SRSF3  | CENPO    | 0.61705418  | 5.17E-66 |
| SRSF1  | PRMT3    | 0.617042075 | 5.21E-66 |
| SRSF7  | SFPQ     | 0.61702934  | 5.25E-66 |
| SRSF10 | CLCN6    | 0.617028966 | 5.25E-66 |
| SRSF9  | RFC5     | 0.617016727 | 5.29E-66 |
| SRSF1  | STRN4    | 0.617005038 | 5.33E-66 |
| SRSF9  | CAND1    | 0.616906638 | 5.66E-66 |
| SRSF3  | CCDC43   | 0.616874526 | 5.77E-66 |
| SRSF10 | STXBP3   | 0.61675564  | 6.21E-66 |
| SRSF10 | CDK2     | 0.616706089 | 6.40E-66 |
| SRSF3  | PRPF38A  | 0.616641129 | 6.66E-66 |

|        |          |             |          |
|--------|----------|-------------|----------|
| SRSF1  | ANAPC7   | 0.616535634 | 7.11E-66 |
| SRSF7  | SRRT     | 0.61650432  | 7.24E-66 |
| SRSF3  | KIF18A   | 0.616496881 | 7.28E-66 |
| SRSF2  | UBE2N    | 0.616474399 | 7.38E-66 |
| SRSF11 | PIKFYVE  | 0.616466324 | 7.41E-66 |
| SRSF1  | RNF219   | 0.616460719 | 7.44E-66 |
| SRSF9  | MSH2     | 0.616451736 | 7.48E-66 |
| SRSF1  | LRRC37B  | 0.616449902 | 7.49E-66 |
| SRSF10 | ZFC3H1   | 0.616409736 | 7.68E-66 |
| SRSF1  | SUPT16H  | 0.616394483 | 7.75E-66 |
| SRSF10 | ZNF131   | 0.616249088 | 8.47E-66 |
| SRSF9  | STIP1    | 0.616193015 | 8.77E-66 |
| SRSF2  | TOP2A    | 0.616162399 | 8.93E-66 |
| SRSF1  | PPP1R12A | 0.616115193 | 9.19E-66 |
| SRSF2  | KIF20A   | 0.616106947 | 9.24E-66 |
| SRSF1  | MTA3     | 0.616065685 | 9.48E-66 |
| SRSF9  | CDCA8    | 0.616027206 | 9.70E-66 |
| SRSF1  | HNRNPR   | 0.616018545 | 9.76E-66 |
| SRSF10 | CHORDC1  | 0.616016969 | 9.76E-66 |
| SRSF1  | RIT1     | 0.615948849 | 1.02E-65 |
| SRSF9  | CCT7     | 0.615936682 | 1.03E-65 |
| SRSF1  | HNRNPUL1 | 0.615877027 | 1.06E-65 |
| SRSF10 | RNF138   | 0.615863489 | 1.07E-65 |
| SRSF2  | TRIP13   | 0.615851152 | 1.08E-65 |
| SRSF1  | CREB1    | 0.61579684  | 1.12E-65 |
| SRSF1  | NUP160   | 0.61575184  | 1.15E-65 |
| SRSF1  | HAUS6    | 0.615744643 | 1.15E-65 |
| SRSF11 | TDG      | 0.615699517 | 1.19E-65 |
| SRSF3  | PPHLN1   | 0.615678772 | 1.20E-65 |
| SRSF1  | CLSPN    | 0.615676747 | 1.20E-65 |
| SRSF2  | RFC4     | 0.615663406 | 1.21E-65 |
| SRSF10 | NAA25    | 0.615661232 | 1.21E-65 |
| SRSF11 | SPATA13  | 0.615651973 | 1.22E-65 |
| SRSF2  | QRICH1   | 0.61554486  | 1.30E-65 |
| SRSF1  | BAZ2A    | 0.615525441 | 1.32E-65 |
| SRSF9  | CALU     | 0.61543311  | 1.40E-65 |
| SRSF9  | UTP18    | 0.615430246 | 1.40E-65 |
| SRSF10 | VHL      | 0.615423408 | 1.40E-65 |
| SRSF3  | RPIA     | 0.615399713 | 1.42E-65 |
| SRSF11 | CHD6     | 0.615365405 | 1.45E-65 |
| SRSF11 | ANKRD36  | 0.615294292 | 1.52E-65 |
| SRSF3  | PBX2     | 0.615264119 | 1.55E-65 |
| SRSF2  | CCAR1    | 0.615233858 | 1.58E-65 |
| SRSF11 | SENP6    | 0.615204708 | 1.60E-65 |
| SRSF10 | MSL2     | 0.615131368 | 1.68E-65 |
| SRSF1  | UBE2T    | 0.615121703 | 1.69E-65 |
| SRSF1  | CLK2     | 0.615117791 | 1.69E-65 |
| SRSF9  | POLD1    | 0.615084601 | 1.73E-65 |
| SRSF10 | ECT2     | 0.615018038 | 1.80E-65 |
| SRSF1  | CDC45    | 0.61495771  | 1.87E-65 |
| SRSF2  | DNAJC9   | 0.614882305 | 1.95E-65 |

|        |           |             |          |
|--------|-----------|-------------|----------|
| SRSF1  | ASF1B     | 0.614831342 | 2.01E-65 |
| SRSF1  | CCDC66    | 0.614744272 | 2.12E-65 |
| SRSF2  | NDC80     | 0.614739105 | 2.13E-65 |
| SRSF9  | CCT8      | 0.614717968 | 2.16E-65 |
| SRSF2  | RPIA      | 0.614692133 | 2.19E-65 |
| SRSF11 | SCAF11    | 0.614661678 | 2.23E-65 |
| SRSF1  | DHX15     | 0.614655833 | 2.24E-65 |
| SRSF2  | XRCC2     | 0.61462848  | 2.28E-65 |
| SRSF9  | CEP55     | 0.614621757 | 2.29E-65 |
| SRSF11 | PAPOLG    | 0.614612757 | 2.30E-65 |
| SRSF1  | BCLAF1    | 0.61446155  | 2.52E-65 |
| SRSF11 | RAB2B     | 0.61445921  | 2.53E-65 |
| SRSF1  | UIMC1     | 0.614434244 | 2.57E-65 |
| SRSF3  | TARDBP    | 0.614430094 | 2.57E-65 |
| SRSF2  | GPSM2     | 0.614376661 | 2.66E-65 |
| SRSF9  | SSB       | 0.614357154 | 2.69E-65 |
| SRSF3  | RRP36     | 0.61434989  | 2.70E-65 |
| SRSF11 | RBM12B    | 0.614259187 | 2.85E-65 |
| SRSF1  | RBM17     | 0.614257593 | 2.86E-65 |
| SRSF1  | HCFC1     | 0.614219022 | 2.92E-65 |
| SRSF2  | ZNF639    | 0.61417363  | 3.01E-65 |
| SRSF2  | NASP      | 0.614163579 | 3.03E-65 |
| SRSF3  | PAK1IP1   | 0.614148077 | 3.05E-65 |
| SRSF9  | NEDD1     | 0.614108845 | 3.13E-65 |
| SRSF10 | MED23     | 0.614103418 | 3.14E-65 |
| SRSF7  | RBM5      | 0.614017023 | 3.31E-65 |
| SRSF3  | SSRP1     | 0.613992984 | 3.36E-65 |
| SRSF10 | CREBZF    | 0.613931918 | 3.48E-65 |
| SRSF2  | FOXMI     | 0.613923571 | 3.50E-65 |
| SRSF10 | CDK17     | 0.613748525 | 3.89E-65 |
| SRSF9  | NAP1L1    | 0.613747761 | 3.89E-65 |
| SRSF1  | CSTF3     | 0.613738216 | 3.92E-65 |
| SRSF11 | ZNF248    | 0.613722024 | 3.96E-65 |
| SRSF3  | GPN1      | 0.613714974 | 3.97E-65 |
| SRSF4  | PRPF38B   | 0.613684083 | 4.05E-65 |
| SRSF10 | QSER1     | 0.613658037 | 4.11E-65 |
| SRSF9  | CDK1      | 0.613607582 | 4.24E-65 |
| SRSF9  | ACLY      | 0.613605359 | 4.25E-65 |
| SRSF11 | RNPC3     | 0.613581881 | 4.31E-65 |
| SRSF2  | CENPO     | 0.613547167 | 4.40E-65 |
| SRSF1  | CCNB2     | 0.613541129 | 4.42E-65 |
| SRSF1  | PTPDC1    | 0.613504192 | 4.52E-65 |
| SRSF3  | DBF4      | 0.613471635 | 4.61E-65 |
| SRSF7  | HNRNPA2B1 | 0.613424778 | 4.74E-65 |
| SRSF9  | H2AFY     | 0.613408861 | 4.78E-65 |
| SRSF3  | CEP55     | 0.613356011 | 4.94E-65 |
| SRSF1  | UBAP2     | 0.613312965 | 5.07E-65 |
| SRSF1  | KIF4A     | 0.613305011 | 5.09E-65 |
| SRSF1  | GRPEL2    | 0.613304419 | 5.10E-65 |
| SRSF9  | MPZL1     | 0.613253622 | 5.26E-65 |
| SRSF9  | ILF2      | 0.613237946 | 5.31E-65 |

|        |          |             |          |
|--------|----------|-------------|----------|
| SRSF1  | HSPA14   | 0.613236762 | 5.31E-65 |
| SRSF3  | STX6     | 0.61312516  | 5.68E-65 |
| SRSF2  | CASP2    | 0.613102694 | 5.76E-65 |
| SRSF2  | DENND4B  | 0.613088812 | 5.81E-65 |
| SRSF1  | PIF1     | 0.613082648 | 5.83E-65 |
| SRSF1  | CHEK1    | 0.613044483 | 5.97E-65 |
| SRSF9  | CENPO    | 0.613042855 | 5.97E-65 |
| SRSF2  | TROAP    | 0.612960205 | 6.28E-65 |
| SRSF11 | SUDS3    | 0.612919592 | 6.43E-65 |
| SRSF2  | SFSWAP   | 0.61291564  | 6.45E-65 |
| SRSF3  | EHMT2    | 0.61286999  | 6.63E-65 |
| SRSF3  | CENPQ    | 0.61283798  | 6.76E-65 |
| SRSF9  | BUB1     | 0.612763925 | 7.07E-65 |
| SRSF3  | XPO5     | 0.612683177 | 7.42E-65 |
| SRSF1  | PRDM4    | 0.612669594 | 7.49E-65 |
| SRSF1  | TPX2     | 0.612663422 | 7.51E-65 |
| SRSF9  | OIP5     | 0.612583598 | 7.89E-65 |
| SRSF2  | C5orf34  | 0.612491863 | 8.34E-65 |
| SRSF1  | DENR     | 0.612455466 | 8.52E-65 |
| SRSF10 | WDR82    | 0.612436893 | 8.62E-65 |
| SRSF2  | FAM104A  | 0.612404774 | 8.79E-65 |
| SRSF1  | KPNA2    | 0.6123958   | 8.83E-65 |
| SRSF1  | RNPS1    | 0.612382517 | 8.90E-65 |
| SRSF3  | TAF11    | 0.612333856 | 9.17E-65 |
| SRSF10 | ZBTB34   | 0.612321782 | 9.24E-65 |
| SRSF11 | MDM1     | 0.612310799 | 9.30E-65 |
| SRSF1  | GPATCH8  | 0.612281376 | 9.47E-65 |
| SRSF7  | IQCB1    | 0.612278246 | 9.48E-65 |
| SRSF3  | SNRPB    | 0.612270151 | 9.53E-65 |
| SRSF9  | RAB5C    | 0.612147053 | 1.03E-64 |
| SRSF4  | CDK11A   | 0.612145223 | 1.03E-64 |
| SRSF9  | TRA2B    | 0.612121374 | 1.04E-64 |
| SRSF2  | KIFC1    | 0.612076285 | 1.07E-64 |
| SRSF3  | HSPA14   | 0.612034084 | 1.10E-64 |
| SRSF1  | TROAP    | 0.61196885  | 1.14E-64 |
| SRSF9  | DDOST    | 0.611882467 | 1.20E-64 |
| SRSF11 | DNA2     | 0.611845782 | 1.23E-64 |
| SRSF11 | HECTD2   | 0.611833957 | 1.24E-64 |
| SRSF10 | ZNF484   | 0.611833116 | 1.24E-64 |
| SRSF10 | YEATS2   | 0.611813075 | 1.26E-64 |
| SRSF9  | CCNB2    | 0.611801973 | 1.26E-64 |
| SRSF1  | NUP205   | 0.611800967 | 1.26E-64 |
| SRSF2  | C17orf53 | 0.611777496 | 1.28E-64 |
| SRSF7  | TIA1     | 0.61175347  | 1.30E-64 |
| SRSF1  | POLD1    | 0.611727702 | 1.32E-64 |
| SRSF10 | PLK4     | 0.61171143  | 1.34E-64 |
| SRSF1  | MSL1     | 0.611626848 | 1.40E-64 |
| SRSF2  | NPHP3    | 0.611601572 | 1.43E-64 |
| SRSF9  | HNRNPU   | 0.61159241  | 1.43E-64 |
| SRSF1  | NUP62    | 0.61159165  | 1.43E-64 |
| SRSF10 | MASTL    | 0.61158141  | 1.44E-64 |

|        |         |             |          |
|--------|---------|-------------|----------|
| SRSF7  | ADPGK   | 0.611569082 | 1.45E-64 |
| SRSF2  | METTL4  | 0.611527285 | 1.49E-64 |
| SRSF10 | ZDHHC21 | 0.611522931 | 1.50E-64 |
| SRSF2  | HDAC2   | 0.61147695  | 1.54E-64 |
| SRSF10 | COPB1   | 0.611459379 | 1.55E-64 |
| SRSF3  | GTPBP2  | 0.611440666 | 1.57E-64 |
| SRSF2  | ADPGK   | 0.611407866 | 1.60E-64 |
| SRSF1  | TCF3    | 0.611402219 | 1.61E-64 |
| SRSF1  | AEBP2   | 0.611394112 | 1.62E-64 |
| SRSF10 | SOCS4   | 0.611393263 | 1.62E-64 |
| SRSF1  | CENPJ   | 0.611373639 | 1.64E-64 |
| SRSF1  | ZNF638  | 0.611268641 | 1.74E-64 |
| SRSF1  | YTHDC1  | 0.611238624 | 1.77E-64 |
| SRSF11 | DDX20   | 0.611174528 | 1.84E-64 |
| SRSF3  | DHX9    | 0.611141973 | 1.88E-64 |
| SRSF1  | NCAPG2  | 0.611140605 | 1.88E-64 |
| SRSF1  | TACC3   | 0.611119712 | 1.91E-64 |
| SRSF2  | HGS     | 0.611103719 | 1.92E-64 |
| SRSF10 | CDC27   | 0.610958464 | 2.10E-64 |
| SRSF1  | MED12   | 0.610909389 | 2.16E-64 |
| SRSF2  | CHTOP   | 0.610866537 | 2.22E-64 |
| SRSF9  | DNAJC14 | 0.610825819 | 2.27E-64 |
| SRSF9  | ZNF207  | 0.610819065 | 2.28E-64 |
| SRSF9  | GTSE1   | 0.610817133 | 2.29E-64 |
| SRSF6  | NKTR    | 0.610815094 | 2.29E-64 |
| SRSF3  | H2AFY   | 0.610805541 | 2.30E-64 |
| SRSF10 | ARMC8   | 0.610724421 | 2.42E-64 |
| SRSF9  | YEATS4  | 0.610658631 | 2.52E-64 |
| SRSF1  | SET     | 0.610624673 | 2.57E-64 |
| SRSF1  | GTF3C3  | 0.610606652 | 2.59E-64 |
| SRSF9  | MCM6    | 0.610527735 | 2.72E-64 |
| SRSF7  | MTF2    | 0.610487591 | 2.79E-64 |
| SRSF2  | XPO1    | 0.610435362 | 2.88E-64 |
| SRSF9  | DBR1    | 0.610373539 | 2.98E-64 |
| SRSF9  | KIF18A  | 0.610361047 | 3.01E-64 |
| SRSF9  | YWHAB   | 0.610332565 | 3.06E-64 |
| SRSF1  | PHF21A  | 0.610324889 | 3.07E-64 |
| SRSF10 | DCLRE1B | 0.610322522 | 3.08E-64 |
| SRSF11 | CPSF7   | 0.61029185  | 3.13E-64 |
| SRSF9  | ANLN    | 0.610240789 | 3.23E-64 |
| SRSF2  | SETD5   | 0.610107597 | 3.50E-64 |
| SRSF9  | BAK1    | 0.610099635 | 3.52E-64 |
| SRSF2  | CDC45   | 0.610079566 | 3.56E-64 |
| SRSF10 | SBNO1   | 0.610043766 | 3.64E-64 |
| SRSF2  | PTBP2   | 0.610031049 | 3.66E-64 |
| SRSF10 | GPATCH8 | 0.610018672 | 3.69E-64 |
| SRSF3  | HMGB2   | 0.610011554 | 3.71E-64 |
| SRSF1  | MTPAP   | 0.609974927 | 3.79E-64 |
| SRSF1  | HAUS1   | 0.609893059 | 3.98E-64 |
| SRSF10 | CASP2   | 0.609874383 | 4.03E-64 |
| SRSF3  | NUP107  | 0.609837508 | 4.12E-64 |

|        |          |             |          |
|--------|----------|-------------|----------|
| SRSF3  | GMPS     | 0.609795176 | 4.22E-64 |
| SRSF1  | UBE2I    | 0.609781909 | 4.25E-64 |
| SRSF2  | MCM2     | 0.609773404 | 4.28E-64 |
| SRSF10 | NUP107   | 0.609709524 | 4.44E-64 |
| SRSF9  | ACTR6    | 0.609668076 | 4.55E-64 |
| SRSF11 | USP48    | 0.609659475 | 4.58E-64 |
| SRSF1  | SOCS7    | 0.60948556  | 5.08E-64 |
| SRSF1  | PDCL     | 0.609372558 | 5.44E-64 |
| SRSF1  | PTBP1    | 0.609347141 | 5.52E-64 |
| SRSF1  | LCORL    | 0.609335937 | 5.56E-64 |
| SRSF9  | GLRX3    | 0.609281567 | 5.74E-64 |
| SRSF11 | MKNK1    | 0.609275121 | 5.76E-64 |
| SRSF2  | KIAA1841 | 0.60921133  | 5.98E-64 |
| SRSF9  | SPATS2   | 0.609176671 | 6.11E-64 |
| SRSF2  | DNA2     | 0.609161454 | 6.17E-64 |
| SRSF9  | PLIN3    | 0.609114179 | 6.34E-64 |
| SRSF10 | RICTOR   | 0.609041821 | 6.62E-64 |
| SRSF6  | CREBZF   | 0.609018514 | 6.72E-64 |
| SRSF1  | RAD51    | 0.60901767  | 6.72E-64 |
| SRSF3  | BUB1B    | 0.60898798  | 6.84E-64 |
| SRSF11 | ADNP     | 0.608976398 | 6.89E-64 |
| SRSF9  | HAUS2    | 0.608972366 | 6.90E-64 |
| SRSF2  | CNOT6    | 0.608963904 | 6.94E-64 |
| SRSF1  | CENPI    | 0.608926385 | 7.09E-64 |
| SRSF2  | METTL17  | 0.608854003 | 7.41E-64 |
| SRSF1  | ZNF107   | 0.608761728 | 7.83E-64 |
| SRSF3  | ZCCHC3   | 0.608671821 | 8.26E-64 |
| SRSF1  | ATXN2L   | 0.608634969 | 8.44E-64 |
| SRSF10 | STX12    | 0.608588976 | 8.68E-64 |
| SRSF2  | DMTF1    | 0.60858097  | 8.72E-64 |
| SRSF11 | PHF2     | 0.608438747 | 9.49E-64 |
| SRSF2  | ZCCHC8   | 0.608353195 | 9.99E-64 |
| SRSF1  | SSB      | 0.608228479 | 1.08E-63 |
| SRSF10 | VEZT     | 0.608209459 | 1.09E-63 |
| SRSF11 | RC3H1    | 0.60818354  | 1.10E-63 |
| SRSF10 | ARID1B   | 0.608171837 | 1.11E-63 |
| SRSF1  | QRICH1   | 0.608119526 | 1.15E-63 |
| SRSF1  | ANKRD27  | 0.608072694 | 1.18E-63 |
| SRSF11 | SPEN     | 0.608006397 | 1.23E-63 |
| SRSF1  | FAM72A   | 0.607990389 | 1.24E-63 |
| SRSF3  | ABT1     | 0.607902535 | 1.31E-63 |
| SRSF1  | UBE2E1   | 0.607895672 | 1.31E-63 |
| SRSF11 | EP400    | 0.607801237 | 1.39E-63 |
| SRSF10 | DCK      | 0.60774154  | 1.44E-63 |
| SRSF3  | NUF2     | 0.607719355 | 1.46E-63 |
| SRSF3  | TJAP1    | 0.607691348 | 1.48E-63 |
| SRSF1  | E2F3     | 0.607679032 | 1.49E-63 |
| SRSF1  | TP53BP1  | 0.607670118 | 1.50E-63 |
| SRSF9  | M6PR     | 0.60765565  | 1.51E-63 |
| SRSF9  | KIF2C    | 0.607611007 | 1.55E-63 |
| SRSF1  | CEP135   | 0.607596832 | 1.57E-63 |

|        |          |             |          |
|--------|----------|-------------|----------|
| SRSF9  | CCT6A    | 0.60757594  | 1.59E-63 |
| SRSF9  | DLGAP5   | 0.607566843 | 1.59E-63 |
| SRSF9  | ORC6     | 0.60751175  | 1.65E-63 |
| SRSF11 | KRIT1    | 0.60748657  | 1.67E-63 |
| SRSF9  | RBM12    | 0.607478796 | 1.68E-63 |
| SRSF1  | ASXL1    | 0.607456569 | 1.70E-63 |
| SRSF10 | UBXN4    | 0.60734778  | 1.82E-63 |
| SRSF2  | FAM72B   | 0.607321907 | 1.84E-63 |
| SRSF11 | CCDC82   | 0.607227856 | 1.95E-63 |
| SRSF10 | KNTC1    | 0.607182517 | 2.00E-63 |
| SRSF9  | PNO1     | 0.607166788 | 2.02E-63 |
| SRSF9  | DDX50    | 0.607144459 | 2.05E-63 |
| SRSF2  | CBFA2T2  | 0.60707632  | 2.13E-63 |
| SRSF1  | VHL      | 0.6070728   | 2.14E-63 |
| SRSF2  | CDK1     | 0.607059596 | 2.15E-63 |
| SRSF9  | CCNB1    | 0.607026034 | 2.20E-63 |
| SRSF1  | METTL3   | 0.60701058  | 2.22E-63 |
| SRSF10 | CENPE    | 0.607005618 | 2.22E-63 |
| SRSF2  | ACYP1    | 0.606943711 | 2.31E-63 |
| SRSF3  | UBE2I    | 0.606882078 | 2.39E-63 |
| SRSF2  | CENPE    | 0.606871539 | 2.41E-63 |
| SRSF2  | ZMYM1    | 0.606864183 | 2.42E-63 |
| SRSF2  | RSRC2    | 0.606841652 | 2.45E-63 |
| SRSF11 | SASS6    | 0.606840503 | 2.45E-63 |
| SRSF10 | RYK      | 0.606797271 | 2.52E-63 |
| SRSF11 | DYRK1A   | 0.606768455 | 2.56E-63 |
| SRSF10 | DIP2B    | 0.606748087 | 2.59E-63 |
| SRSF7  | ERCC3    | 0.606724126 | 2.63E-63 |
| SRSF10 | AZI2     | 0.606719004 | 2.64E-63 |
| SRSF7  | RSRC2    | 0.606695325 | 2.67E-63 |
| SRSF2  | SMURF2   | 0.606637052 | 2.77E-63 |
| SRSF10 | ZNF644   | 0.606623    | 2.79E-63 |
| SRSF2  | HSPA14   | 0.606606694 | 2.82E-63 |
| SRSF2  | CDC6     | 0.606525057 | 2.96E-63 |
| SRSF6  | TRA2A    | 0.606479076 | 3.04E-63 |
| SRSF2  | YEATS2   | 0.606390837 | 3.20E-63 |
| SRSF1  | DEPDC1   | 0.606362925 | 3.25E-63 |
| SRSF2  | LRRC37B  | 0.606340588 | 3.30E-63 |
| SRSF1  | C17orf80 | 0.606337293 | 3.30E-63 |
| SRSF3  | TPM3     | 0.606288657 | 3.40E-63 |
| SRSF2  | LMNB2    | 0.606253909 | 3.47E-63 |
| SRSF1  | BARD1    | 0.606253567 | 3.47E-63 |
| SRSF11 | EXTL2    | 0.606198989 | 3.58E-63 |
| SRSF9  | UBE2E1   | 0.606175158 | 3.64E-63 |
| SRSF11 | ZNF84    | 0.606158285 | 3.67E-63 |
| SRSF10 | CDC42    | 0.606130742 | 3.73E-63 |
| SRSF10 | KPNA6    | 0.606130347 | 3.73E-63 |
| SRSF3  | HMGB1    | 0.606099605 | 3.80E-63 |
| SRSF2  | ZBTB40   | 0.606096219 | 3.81E-63 |
| SRSF11 | LY6G5B   | 0.606081989 | 3.84E-63 |
| SRSF9  | PHF5A    | 0.606081614 | 3.84E-63 |



|        |         |             |          |
|--------|---------|-------------|----------|
| SRSF2  | POLD1   | 0.606062381 | 3.89E-63 |
| SRSF10 | ZNF267  | 0.605981546 | 4.08E-63 |
| SRSF3  | NCAPH   | 0.605962985 | 4.12E-63 |
| SRSF10 | ATXN2L  | 0.605954357 | 4.14E-63 |
| SRSF9  | RBBP7   | 0.605904978 | 4.26E-63 |
| SRSF2  | UIMC1   | 0.605839702 | 4.43E-63 |
| SRSF1  | ANKRD52 | 0.60583744  | 4.44E-63 |
| SRSF11 | SGK494  | 0.605814601 | 4.50E-63 |
| SRSF1  | TET3    | 0.605813592 | 4.50E-63 |
| SRSF10 | MGA     | 0.605784238 | 4.58E-63 |
| SRSF1  | SHCBP1  | 0.605781123 | 4.59E-63 |
| SRSF2  | DBF4    | 0.605773924 | 4.61E-63 |
| SRSF10 | PRPF38A | 0.605768021 | 4.62E-63 |
| SRSF9  | VPS26A  | 0.605765692 | 4.63E-63 |
| SRSF2  | HNRNPC  | 0.605756827 | 4.65E-63 |
| SRSF1  | VPS8    | 0.605753143 | 4.66E-63 |
| SRSF10 | NCBP1   | 0.605703141 | 4.80E-63 |
| SRSF2  | PLK1    | 0.605694773 | 4.83E-63 |
| SRSF3  | RCE1    | 0.605662028 | 4.92E-63 |
| SRSF10 | SMC5    | 0.605649566 | 4.96E-63 |
| SRSF2  | BRCA1   | 0.605638986 | 4.99E-63 |
| SRSF1  | ZCCHC3  | 0.605596561 | 5.12E-63 |
| SRSF1  | IARS    | 0.605561737 | 5.22E-63 |
| SRSF10 | TP53BP1 | 0.605497408 | 5.42E-63 |
| SRSF11 | TBC1D8  | 0.605448205 | 5.58E-63 |
| SRSF1  | MTA2    | 0.60541762  | 5.68E-63 |
| SRSF9  | PCBP2   | 0.605389964 | 5.78E-63 |
| SRSF1  | DCLRE1B | 0.605306217 | 6.07E-63 |
| SRSF1  | UBAP2L  | 0.60529977  | 6.09E-63 |
| SRSF2  | TMEM39A | 0.605258721 | 6.24E-63 |
| SRSF11 | PRDM10  | 0.605249766 | 6.28E-63 |
| SRSF11 | ZNF26   | 0.605243986 | 6.30E-63 |
| SRSF10 | TAOK1   | 0.605181991 | 6.53E-63 |
| SRSF1  | PURB    | 0.605167632 | 6.59E-63 |
| SRSF1  | RCN2    | 0.605156554 | 6.63E-63 |
| SRSF6  | RSRC2   | 0.605118304 | 6.78E-63 |
| SRSF3  | BTN2A1  | 0.605045854 | 7.08E-63 |
| SRSF9  | CDC123  | 0.604965621 | 7.42E-63 |
| SRSF9  | ZWILCH  | 0.604838527 | 7.99E-63 |
| SRSF10 | NDE1    | 0.604786505 | 8.24E-63 |
| SRSF11 | SCAF8   | 0.604785439 | 8.25E-63 |
| SRSF2  | ZNF169  | 0.604755679 | 8.39E-63 |
| SRSF11 | DDX17   | 0.604735663 | 8.49E-63 |
| SRSF1  | THUMPD2 | 0.604732819 | 8.51E-63 |
| SRSF4  | PANK4   | 0.60472733  | 8.53E-63 |
| SRSF3  | PRRC2A  | 0.604721286 | 8.57E-63 |
| SRSF11 | SLC30A7 | 0.604609225 | 9.15E-63 |
| SRSF1  | MEX3C   | 0.604600294 | 9.20E-63 |
| SRSF9  | H2AFZ   | 0.604598189 | 9.21E-63 |
| SRSF1  | POU2F1  | 0.604595577 | 9.22E-63 |
| SRSF10 | HAUS2   | 0.604560067 | 9.42E-63 |

|        |          |             |          |
|--------|----------|-------------|----------|
| SRSF1  | CHD4     | 0.60453086  | 9.58E-63 |
| SRSF2  | ZNF202   | 0.604521504 | 9.63E-63 |
| SRSF3  | U2AF2    | 0.604504606 | 9.73E-63 |
| SRSF10 | INCENP   | 0.604472606 | 9.91E-63 |
| SRSF1  | SPIN1    | 0.604468708 | 9.94E-63 |
| SRSF2  | RBMX     | 0.60444206  | 1.01E-62 |
| SRSF1  | ZBED4    | 0.604440878 | 1.01E-62 |
| SRSF11 | ATXN7    | 0.6044149   | 1.03E-62 |
| SRSF2  | PIP5K1A  | 0.604403798 | 1.03E-62 |
| SRSF3  | MCM7     | 0.604393032 | 1.04E-62 |
| SRSF2  | ANAPC7   | 0.604346121 | 1.07E-62 |
| SRSF10 | PTBP2    | 0.604320579 | 1.08E-62 |
| SRSF1  | UTP20    | 0.604312869 | 1.09E-62 |
| SRSF10 | UBA3     | 0.60429268  | 1.10E-62 |
| SRSF1  | RBM45    | 0.604240211 | 1.14E-62 |
| SRSF3  | SNRPA1   | 0.604146925 | 1.20E-62 |
| SRSF10 | BUB1B    | 0.604135651 | 1.21E-62 |
| SRSF3  | RSL24D1  | 0.604130701 | 1.21E-62 |
| SRSF11 | SUPT7L   | 0.604100662 | 1.23E-62 |
| SRSF2  | LARP4B   | 0.604051717 | 1.27E-62 |
| SRSF9  | PSMD2    | 0.604049205 | 1.27E-62 |
| SRSF2  | MCM8     | 0.604035985 | 1.28E-62 |
| SRSF3  | DDX27    | 0.60403479  | 1.28E-62 |
| SRSF1  | ZNF567   | 0.604000436 | 1.31E-62 |
| SRSF2  | ZNF142   | 0.603990486 | 1.32E-62 |
| SRSF10 | HMGXB4   | 0.603960689 | 1.34E-62 |
| SRSF7  | HNRNPC   | 0.603916755 | 1.37E-62 |
| SRSF3  | CHEK1    | 0.603868229 | 1.41E-62 |
| SRSF7  | FANCL    | 0.603821084 | 1.45E-62 |
| SRSF3  | MORF4L1  | 0.60380798  | 1.46E-62 |
| SRSF3  | ANP32B   | 0.60379509  | 1.48E-62 |
| SRSF2  | KHDRBS1  | 0.603780916 | 1.49E-62 |
| SRSF11 | CCDC93   | 0.603748932 | 1.52E-62 |
| SRSF10 | SENP1    | 0.603746659 | 1.52E-62 |
| SRSF10 | PPP1CB   | 0.603740621 | 1.52E-62 |
| SRSF3  | KIF2C    | 0.603739148 | 1.52E-62 |
| SRSF9  | CENPA    | 0.603729833 | 1.53E-62 |
| SRSF11 | ZNF721   | 0.603707731 | 1.55E-62 |
| SRSF3  | DNAJC9   | 0.603680937 | 1.58E-62 |
| SRSF1  | ETAA1    | 0.603650499 | 1.61E-62 |
| SRSF7  | NUP107   | 0.60364499  | 1.61E-62 |
| SRSF1  | ZNF84    | 0.603638457 | 1.62E-62 |
| SRSF10 | TRIO     | 0.603561225 | 1.69E-62 |
| SRSF1  | NOL8     | 0.603436532 | 1.82E-62 |
| SRSF9  | KIF11    | 0.60343322  | 1.82E-62 |
| SRSF6  | MDM4     | 0.603425163 | 1.83E-62 |
| SRSF1  | C17orf53 | 0.603420472 | 1.84E-62 |
| SRSF1  | NAT10    | 0.603330698 | 1.94E-62 |
| SRSF10 | SLMAP    | 0.603317273 | 1.95E-62 |
| SRSF10 | NFATC2IP | 0.60324517  | 2.04E-62 |
| SRSF3  | EXOSC3   | 0.603215559 | 2.07E-62 |

|        |           |             |          |
|--------|-----------|-------------|----------|
| SRSF11 | CCDC66    | 0.603197657 | 2.09E-62 |
| SRSF10 | PHIP      | 0.603138633 | 2.17E-62 |
| SRSF2  | PHF19     | 0.60313083  | 2.18E-62 |
| SRSF10 | ZNF326    | 0.603096039 | 2.22E-62 |
| SRSF9  | IFT52     | 0.602944664 | 2.43E-62 |
| SRSF10 | ARHGAP11A | 0.60293292  | 2.44E-62 |
| SRSF9  | RPN2      | 0.60286675  | 2.54E-62 |
| SRSF11 | CAPZA1    | 0.602863007 | 2.54E-62 |
| SRSF1  | HECTD2    | 0.602812258 | 2.62E-62 |
| SRSF10 | REV1      | 0.602810035 | 2.62E-62 |
| SRSF3  | CD2AP     | 0.602794924 | 2.65E-62 |
| SRSF1  | PHF19     | 0.602772988 | 2.68E-62 |
| SRSF1  | PPP4R1    | 0.602763217 | 2.70E-62 |
| SRSF10 | SPIN4     | 0.602709393 | 2.78E-62 |
| SRSF2  | FANCB     | 0.602698573 | 2.80E-62 |
| SRSF2  | MCM6      | 0.602663501 | 2.86E-62 |
| SRSF9  | CDCA5     | 0.60266208  | 2.86E-62 |
| SRSF1  | DDX46     | 0.602589325 | 2.99E-62 |
| SRSF1  | ZBTB12    | 0.602445334 | 3.25E-62 |
| SRSF10 | RBM12     | 0.602428819 | 3.28E-62 |
| SRSF6  | PNISR     | 0.602425111 | 3.29E-62 |
| SRSF3  | MCM6      | 0.602424886 | 3.29E-62 |
| SRSF11 | PCF11     | 0.602375413 | 3.38E-62 |
| SRSF10 | ADNP      | 0.602348916 | 3.44E-62 |
| SRSF10 | CNOT6     | 0.602344521 | 3.44E-62 |
| SRSF11 | C1orf52   | 0.602331121 | 3.47E-62 |
| SRSF11 | HIPK1     | 0.602267267 | 3.60E-62 |
| SRSF10 | ZSCAN30   | 0.602253359 | 3.63E-62 |
| SRSF10 | NPAT      | 0.602250532 | 3.64E-62 |
| SRSF1  | ZDHHC17   | 0.602181029 | 3.79E-62 |
| SRSF2  | MSH2      | 0.602142253 | 3.88E-62 |
| SRSF1  | UBE2C     | 0.602120569 | 3.92E-62 |
| SRSF10 | ZNF248    | 0.602075123 | 4.03E-62 |
| SRSF9  | SLC25A19  | 0.602071476 | 4.04E-62 |
| SRSF1  | DDX20     | 0.602033243 | 4.13E-62 |
| SRSF3  | PCNP      | 0.601993851 | 4.22E-62 |
| SRSF1  | ACYP1     | 0.601957908 | 4.31E-62 |
| SRSF3  | SRRT      | 0.601917188 | 4.42E-62 |
| SRSF9  | HNRNPA3   | 0.601902109 | 4.46E-62 |
| SRSF2  | EXO1      | 0.601864009 | 4.56E-62 |
| SRSF11 | GON4L     | 0.601831567 | 4.64E-62 |
| SRSF1  | CGGBP1    | 0.601820519 | 4.67E-62 |
| SRSF10 | SGK494    | 0.601793073 | 4.75E-62 |
| SRSF3  | HMGN4     | 0.60176826  | 4.82E-62 |
| SRSF2  | ARMC8     | 0.601762292 | 4.83E-62 |
| SRSF11 | CCDC18    | 0.601733895 | 4.92E-62 |
| SRSF1  | UPF3B     | 0.60172723  | 4.93E-62 |
| SRSF11 | RASA2     | 0.601707816 | 4.99E-62 |
| SRSF9  | SBNO1     | 0.601658552 | 5.14E-62 |
| SRSF2  | MSL2      | 0.601615141 | 5.27E-62 |
| SRSF2  | ATXN2L    | 0.601607161 | 5.29E-62 |

|        |         |             |          |
|--------|---------|-------------|----------|
| SRSF3  | DEPDC1B | 0.601599718 | 5.31E-62 |
| SRSF4  | FOXJ3   | 0.601596874 | 5.32E-62 |
| SRSF1  | CDCA3   | 0.601594723 | 5.33E-62 |
| SRSF10 | RPAP3   | 0.601578308 | 5.38E-62 |
| SRSF1  | MAP4K5  | 0.601555467 | 5.45E-62 |
| SRSF3  | PTBP1   | 0.60154204  | 5.50E-62 |
| SRSF2  | BUB1    | 0.601541098 | 5.50E-62 |
| SRSF2  | PRPF3   | 0.601530516 | 5.53E-62 |
| SRSF2  | CENPJ   | 0.601510892 | 5.60E-62 |
| SRSF10 | TANK    | 0.601394757 | 5.99E-62 |
| SRSF1  | PDCD7   | 0.601394096 | 5.99E-62 |
| SRSF1  | CSNK2A1 | 0.601366926 | 6.08E-62 |
| SRSF9  | DPF2    | 0.601352561 | 6.13E-62 |
| SRSF1  | SOCS5   | 0.601318244 | 6.26E-62 |
| SRSF3  | LEMD2   | 0.601304405 | 6.31E-62 |
| SRSF2  | TRIM59  | 0.601303164 | 6.31E-62 |
| SRSF11 | ARID1B  | 0.601303051 | 6.31E-62 |
| SRSF6  | ZDHHC17 | 0.601296704 | 6.34E-62 |
| SRSF1  | PKMYT1  | 0.601296278 | 6.34E-62 |
| SRSF9  | PRIM2   | 0.6012618   | 6.47E-62 |
| SRSF2  | SKA3    | 0.601187482 | 6.75E-62 |
| SRSF3  | TRIM28  | 0.601104877 | 7.08E-62 |
| SRSF9  | GTF2H3  | 0.601103588 | 7.09E-62 |
| SRSF3  | TACC3   | 0.601069392 | 7.23E-62 |
| SRSF2  | NCOA5   | 0.601049569 | 7.32E-62 |
| SRSF9  | USP1    | 0.601007137 | 7.50E-62 |
| SRSF3  | HJURP   | 0.601002956 | 7.52E-62 |
| SRSF3  | C6orf48 | 0.600999278 | 7.53E-62 |
| SRSF9  | BTBD10  | 0.600967931 | 7.67E-62 |
| SRSF1  | FRMD8   | 0.600950752 | 7.75E-62 |
| SRSF9  | EIF4H   | 0.600925865 | 7.86E-62 |
| SRSF10 | BCOR    | 0.600902269 | 7.97E-62 |
| SRSF7  | ILF3    | 0.600878671 | 8.08E-62 |
| SRSF1  | EFCAB7  | 0.600847242 | 8.23E-62 |
| SRSF1  | RMI2    | 0.600810058 | 8.41E-62 |
| SRSF1  | SRRT    | 0.600775817 | 8.57E-62 |
| SRSF1  | WDR62   | 0.600757785 | 8.66E-62 |
| SRSF3  | RBM8A   | 0.600744587 | 8.73E-62 |
| SRSF9  | SENPI   | 0.600699613 | 8.96E-62 |
| SRSF1  | TAF1B   | 0.600633634 | 9.31E-62 |
| SRSF9  | CBX3    | 0.600547998 | 9.78E-62 |
| SRSF2  | STMN1   | 0.600520132 | 9.94E-62 |
| SRSF3  | PSPC1   | 0.600493305 | 1.01E-61 |
| SRSF1  | ZNF621  | 0.600486816 | 1.01E-61 |
| SRSF1  | FOXJ3   | 0.600461583 | 1.03E-61 |
| SRSF6  | ADNP    | 0.600446473 | 1.04E-61 |
| SRSF1  | NIF3L1  | 0.600428612 | 1.05E-61 |
| SRSF9  | LMNB1   | 0.600394548 | 1.07E-61 |
| SRSF10 | MAML1   | 0.600344908 | 1.10E-61 |
| SRSF9  | DKC1    | 0.600337742 | 1.11E-61 |
| SRSF3  | UBE2N   | 0.60026188  | 1.15E-61 |

|        |          |             |          |
|--------|----------|-------------|----------|
| SRSF9  | TPX2     | 0.600216976 | 1.19E-61 |
| SRSF10 | ARID1A   | 0.600211903 | 1.19E-61 |
| SRSF3  | CPSF6    | 0.600197332 | 1.20E-61 |
| SRSF2  | ZDHHC17  | 0.600193448 | 1.20E-61 |
| SRSF10 | ZBTB1    | 0.600103184 | 1.27E-61 |
| SRSF9  | METTL9   | 0.600097561 | 1.27E-61 |
| SRSF3  | ECT2     | 0.600089781 | 1.28E-61 |
| SRSF9  | ACP1     | 0.600042427 | 1.31E-61 |
| SRSF1  | MIS18BP1 | 0.600002735 | 1.34E-61 |

**Table S6.** Univariate COX results of SRSF-related genes with  $p < 0.05$ .

| Gene   | Hazard Ratio | <i>p</i> Value | 95% CI-Lower | 95% CI-Upper |
|--------|--------------|----------------|--------------|--------------|
| CENPA  | 1.573074233  | 1.03E-10       | 1.371123048  | 1.804770583  |
| NCL    | 2.478288278  | 4.11E-10       | 1.8644148    | 3.294284505  |
| CDCA8  | 1.574021477  | 4.41E-10       | 1.364952363  | 1.815113609  |
| TRIP13 | 1.548860491  | 5.33E-10       | 1.34906317   | 1.778247952  |
| KPNA2  | 1.59894401   | 6.05E-10       | 1.378106215  | 1.855170465  |
| KIF2C  | 1.545187105  | 6.30E-10       | 1.346088756  | 1.773733847  |
| PRR11  | 1.638649699  | 6.43E-10       | 1.401057717  | 1.916532633  |
| GTPBP4 | 2.016354979  | 1.59E-09       | 1.605666769  | 2.532086657  |
| MCM10  | 1.551470841  | 1.67E-09       | 1.344966594  | 1.789681455  |
| CCT2   | 1.807202486  | 2.20E-09       | 1.488693032  | 2.193857803  |
| PPM1G  | 2.271762364  | 2.28E-09       | 1.73578693   | 2.973236028  |
| NOP58  | 2.371492922  | 3.46E-09       | 1.780768646  | 3.158174808  |
| TPX2   | 1.464842739  | 3.98E-09       | 1.289955448  | 1.663440588  |
| MYBL2  | 1.322137407  | 4.90E-09       | 1.204061403  | 1.451792506  |
| ERCC6L | 1.998746505  | 5.82E-09       | 1.583085701  | 2.523544737  |
| TTK    | 1.572678447  | 6.62E-09       | 1.349560354  | 1.832683873  |
| SPC25  | 1.562648964  | 6.67E-09       | 1.343812247  | 1.817122735  |
| CCT5   | 1.859554164  | 7.10E-09       | 1.5072625    | 2.294186773  |
| CCT4   | 2.220289124  | 8.80E-09       | 1.691921154  | 2.913660475  |
| KIF18A | 1.688972941  | 1.03E-08       | 1.411588808  | 2.020864418  |
| ANLN   | 1.449862816  | 1.20E-08       | 1.275989542  | 1.647429008  |
| KIF20A | 1.472958367  | 1.45E-08       | 1.288321756  | 1.684056286  |
| PLK1   | 1.513748921  | 1.50E-08       | 1.311353043  | 1.747382833  |
| RAN    | 1.819893567  | 1.51E-08       | 1.479149179  | 2.239133579  |
| CEP55  | 1.438200858  | 1.75E-08       | 1.267448705  | 1.631956939  |
| DBF4   | 2.290355811  | 2.08E-08       | 1.714166071  | 3.060222595  |
| DKC1   | 1.902197749  | 2.30E-08       | 1.518127196  | 2.383434197  |
| DLGAP5 | 1.47230924   | 2.33E-08       | 1.285424198  | 1.686365093  |
| SFPQ   | 2.33685136   | 3.57E-08       | 1.727951345  | 3.160317157  |
| KIF4A  | 1.433259942  | 3.65E-08       | 1.2609202    | 1.629154694  |
| NCAPG  | 1.507968192  | 3.73E-08       | 1.302738695  | 1.74552892   |
| CDCA3  | 1.54506843   | 3.91E-08       | 1.32297418   | 1.804446746  |
| HJURP  | 1.467510175  | 4.31E-08       | 1.279312272  | 1.683393618  |
| CENPI  | 1.703653493  | 5.79E-08       | 1.40536282   | 2.065256874  |
| NDC80  | 1.526482292  | 5.91E-08       | 1.31004036   | 1.778684276  |
| CCT7   | 2.095777991  | 6.70E-08       | 1.602101411  | 2.741577628  |
| PNO1   | 2.239671684  | 6.91E-08       | 1.670818396  | 3.002198961  |
| BUB1   | 1.50802249   | 7.90E-08       | 1.298031612  | 1.751984935  |
| PCBP2  | 2.381617677  | 8.40E-08       | 1.733881423  | 3.271332564  |

|          |             |          |             |             |
|----------|-------------|----------|-------------|-------------|
| FBXO5    | 1.944066414 | 9.12E-08 | 1.523392766 | 2.48090598  |
| DEPDC1   | 1.469996998 | 9.88E-08 | 1.275788308 | 1.693769382 |
| NOP56    | 1.772742216 | 1.11E-07 | 1.434971771 | 2.190018666 |
| GIN51    | 1.508903163 | 1.27E-07 | 1.295319639 | 1.757704189 |
| CCNB1    | 1.426230838 | 1.48E-07 | 1.249343441 | 1.62816271  |
| SKA3     | 1.529701186 | 1.62E-07 | 1.304766827 | 1.793412946 |
| CCT6A    | 1.970858035 | 1.79E-07 | 1.52766663  | 2.542623708 |
| BRIX1    | 1.937915719 | 1.88E-07 | 1.510964219 | 2.485510435 |
| KIF23    | 1.466752967 | 2.27E-07 | 1.268696448 | 1.695728139 |
| C18orf54 | 1.925708812 | 2.29E-07 | 1.502411603 | 2.468267965 |
| CDK4     | 1.648089371 | 3.15E-07 | 1.360893465 | 1.995893612 |
| FOXM1    | 1.449163183 | 3.21E-07 | 1.256983439 | 1.670725219 |
| FAM72B   | 1.86279544  | 3.24E-07 | 1.467320341 | 2.364859776 |
| EXO1     | 1.502435998 | 4.17E-07 | 1.28329355  | 1.759000448 |
| GTSE1    | 1.503159109 | 4.56E-07 | 1.282997716 | 1.761100022 |
| CBX3     | 1.970649449 | 4.59E-07 | 1.513913133 | 2.565179709 |
| RUVBL1   | 1.864418894 | 5.02E-07 | 1.462279993 | 2.377149265 |
| MCM6     | 1.517470779 | 5.13E-07 | 1.289509764 | 1.785731004 |
| EZH2     | 1.621231909 | 5.21E-07 | 1.342421023 | 1.957949748 |
| MCM2     | 1.391081143 | 5.39E-07 | 1.222626795 | 1.582745246 |
| SSB      | 2.017728256 | 5.72E-07 | 1.532383888 | 2.656793345 |
| KIAA1841 | 2.158280709 | 5.73E-07 | 1.596397647 | 2.917929392 |
| STIP1    | 1.766981613 | 6.82E-07 | 1.411441557 | 2.212081688 |
| YWHAQ    | 1.723540615 | 7.61E-07 | 1.38904344  | 2.138588445 |
| CCNF     | 1.711245569 | 7.80E-07 | 1.382775459 | 2.117741805 |
| HDAC2    | 1.951176213 | 7.86E-07 | 1.49655037  | 2.543909441 |
| CAD      | 1.755224554 | 8.39E-07 | 1.403194249 | 2.195571452 |
| FAM72A   | 1.961541323 | 8.40E-07 | 1.500288719 | 2.564602609 |
| BUB1B    | 1.422240572 | 8.58E-07 | 1.236100388 | 1.636410978 |
| NUF2     | 1.380016566 | 8.87E-07 | 1.213679012 | 1.56915107  |
| RAD54L   | 1.45749638  | 9.04E-07 | 1.254061837 | 1.693932178 |
| TMEM237  | 1.874581223 | 9.06E-07 | 1.458783011 | 2.408894767 |
| DHX37    | 2.094908703 | 9.09E-07 | 1.55946543  | 2.814196705 |
| LLPH     | 2.161196681 | 9.36E-07 | 1.58834738  | 2.940648343 |
| RBM17    | 2.004218716 | 1.00E-06 | 1.51684982  | 2.648180862 |
| KIFC1    | 1.370849689 | 1.06E-06 | 1.207764954 | 1.555955788 |
| CDC45    | 1.408714843 | 1.08E-06 | 1.227450386 | 1.616747635 |
| E2F6     | 2.185268828 | 1.17E-06 | 1.594410135 | 2.995088746 |
| TUBA1C   | 1.47072437  | 1.20E-06 | 1.258689606 | 1.718477823 |
| SUV39H2  | 1.991938134 | 1.23E-06 | 1.507796649 | 2.631533591 |
| MELK     | 1.383728701 | 1.25E-06 | 1.213446554 | 1.577906427 |
| NCAPH    | 1.493744393 | 1.28E-06 | 1.269857752 | 1.757104138 |
| CENPE    | 1.647133644 | 1.34E-06 | 1.345404715 | 2.016530201 |
| UBE2C    | 1.298238109 | 1.35E-06 | 1.167827007 | 1.443212203 |
| HAT1     | 1.915903697 | 1.42E-06 | 1.47094113  | 2.495468311 |
| CDC6     | 1.376433524 | 1.47E-06 | 1.208593404 | 1.567581984 |
| RBM45    | 3.067383947 | 1.48E-06 | 1.94351454  | 4.841149413 |
| BEND3    | 1.971698428 | 1.53E-06 | 1.494932743 | 2.600514779 |
| PGAM5    | 2.010205277 | 1.57E-06 | 1.511726913 | 2.673052401 |
| KIF18B   | 1.397104403 | 1.75E-06 | 1.218107145 | 1.602404781 |
| CDK1     | 1.361202783 | 1.88E-06 | 1.199093922 | 1.545227595 |

|         |             |          |             |             |
|---------|-------------|----------|-------------|-------------|
| CDCA5   | 1.404391555 | 1.93E-06 | 1.221138434 | 1.615145003 |
| CENPO   | 1.671716786 | 1.97E-06 | 1.352715895 | 2.065945274 |
| LMNB2   | 1.507519092 | 2.10E-06 | 1.27235479  | 1.786147882 |
| DENR    | 2.058794832 | 2.18E-06 | 1.52694509  | 2.775892982 |
| SNRPD1  | 1.63523961  | 2.19E-06 | 1.334072894 | 2.004394659 |
| YWHAB   | 2.021880332 | 2.24E-06 | 1.510350504 | 2.706656546 |
| H2AFZ   | 1.511518738 | 2.40E-06 | 1.273101074 | 1.794585631 |
| LMNB1   | 1.449080818 | 2.50E-06 | 1.241734304 | 1.69105034  |
| ACP1    | 2.204735992 | 2.51E-06 | 1.586330951 | 3.06421607  |
| CORO1C  | 1.691826819 | 2.75E-06 | 1.358014612 | 2.107693071 |
| NEK2    | 1.364642532 | 2.83E-06 | 1.19814301  | 1.554279602 |
| CLSPN   | 1.457511561 | 2.95E-06 | 1.244537778 | 1.706930869 |
| ECT2    | 1.402413008 | 3.01E-06 | 1.216850089 | 1.616273248 |
| TROAP   | 1.37520375  | 3.07E-06 | 1.20293788  | 1.572138832 |
| MAD2L1  | 1.452227513 | 3.14E-06 | 1.241380904 | 1.69888609  |
| CHORDC1 | 1.763334021 | 3.20E-06 | 1.388913434 | 2.238690184 |
| PAK1IP1 | 1.799480306 | 3.30E-06 | 1.404861482 | 2.304945657 |
| EIF2S2  | 1.831555295 | 3.31E-06 | 1.4192541   | 2.363632277 |
| WDHD1   | 1.727739691 | 3.38E-06 | 1.371840385 | 2.175970669 |
| POLQ    | 1.659450613 | 3.50E-06 | 1.339773287 | 2.055404721 |
| ORC6    | 1.483458147 | 3.94E-06 | 1.254659894 | 1.753979772 |
| PTMA    | 1.794358517 | 3.96E-06 | 1.399724686 | 2.300254129 |
| HNRNPM  | 2.149882448 | 4.00E-06 | 1.552843796 | 2.97647101  |
| ORC1    | 1.546978054 | 4.11E-06 | 1.28485381  | 1.862578514 |
| SSRP1   | 1.850102799 | 4.34E-06 | 1.423036872 | 2.405334979 |
| ANP32B  | 1.699735241 | 4.34E-06 | 1.355500605 | 2.131389598 |
| CDCA4   | 1.61245562  | 4.50E-06 | 1.314710877 | 1.977631107 |
| CKAP2L  | 1.4196293   | 4.97E-06 | 1.221391733 | 1.650041746 |
| NCBP2   | 1.879997123 | 5.26E-06 | 1.432742474 | 2.46686983  |
| NCAPD2  | 1.543278637 | 5.28E-06 | 1.280361347 | 1.860184985 |
| PTGES3  | 2.052230647 | 5.29E-06 | 1.505974448 | 2.796628212 |
| RAD51   | 1.489396042 | 5.40E-06 | 1.254473823 | 1.768311567 |
| GMPS    | 1.838473158 | 5.57E-06 | 1.413654202 | 2.390954979 |
| GRPEL2  | 2.044046968 | 6.04E-06 | 1.499697861 | 2.785979841 |
| NCAPG2  | 1.581370927 | 6.61E-06 | 1.295564738 | 1.930226976 |
| TACC3   | 1.433128893 | 6.62E-06 | 1.225461055 | 1.675988328 |
| ZWINT   | 1.352545706 | 6.70E-06 | 1.185951793 | 1.542541525 |
| GPSM2   | 1.781459143 | 6.98E-06 | 1.384873714 | 2.291614497 |
| FANCB   | 1.796972455 | 7.07E-06 | 1.3914436   | 2.320690543 |
| YTHDF2  | 2.358884317 | 7.83E-06 | 1.619129741 | 3.43662097  |
| STMN1   | 1.35978175  | 7.97E-06 | 1.188211502 | 1.55612566  |
| MKI67   | 1.353075767 | 8.17E-06 | 1.184734199 | 1.54533737  |
| BTF3L4  | 2.002437392 | 8.26E-06 | 1.475657515 | 2.717267027 |
| RFC4    | 1.490205598 | 8.50E-06 | 1.250197235 | 1.776289902 |
| CHEK1   | 1.611910342 | 8.67E-06 | 1.306102837 | 1.989318817 |
| SNRNP40 | 1.8763053   | 9.06E-06 | 1.42108117  | 2.477354322 |
| RPIA    | 1.800539961 | 9.24E-06 | 1.388401671 | 2.335018908 |
| SHCBP1  | 1.428794299 | 9.27E-06 | 1.22028647  | 1.67292943  |
| NAP1L1  | 1.554069685 | 9.83E-06 | 1.278157422 | 1.889542354 |
| EFTUD2  | 1.841866578 | 9.86E-06 | 1.404876883 | 2.41478277  |
| POLA1   | 1.903048119 | 1.01E-05 | 1.430181546 | 2.532260436 |

|          |             |          |             |             |
|----------|-------------|----------|-------------|-------------|
| FANCL    | 1.789779637 | 1.03E-05 | 1.381793931 | 2.318226383 |
| RACGAP1  | 1.448833204 | 1.10E-05 | 1.228080787 | 1.709266747 |
| VRK2     | 1.882664161 | 1.16E-05 | 1.418955384 | 2.497911055 |
| SET      | 1.796314618 | 1.34E-05 | 1.379938566 | 2.338325984 |
| NUP107   | 1.724492559 | 1.38E-05 | 1.348857078 | 2.204736614 |
| MAPKAPK5 | 2.246984461 | 1.41E-05 | 1.559180141 | 3.238201305 |
| DEPDC1B  | 1.339751717 | 1.50E-05 | 1.173575316 | 1.529458434 |
| PPP1CB   | 1.881315337 | 1.53E-05 | 1.412706237 | 2.505366866 |
| CENPL    | 1.670984299 | 1.59E-05 | 1.323470425 | 2.10974758  |
| UPF3B    | 1.749035811 | 1.60E-05 | 1.356780582 | 2.254694907 |
| SNRPB2   | 1.878710975 | 1.63E-05 | 1.410331245 | 2.502642511 |
| MASTL    | 1.735191322 | 1.65E-05 | 1.350377164 | 2.229665168 |
| PPP1CC   | 1.857004124 | 1.70E-05 | 1.400591312 | 2.46214887  |
| ASF1B    | 1.340273866 | 1.72E-05 | 1.172737321 | 1.53174458  |
| RAD51AP1 | 1.428078838 | 1.72E-05 | 1.213894831 | 1.680054248 |
| CALU     | 1.502392307 | 1.74E-05 | 1.247780097 | 1.808958685 |
| CENPH    | 1.578494764 | 1.76E-05 | 1.281588778 | 1.944185033 |
| DDX27    | 1.877398093 | 1.83E-05 | 1.407452649 | 2.504257321 |
| FANCE    | 1.62337913  | 1.86E-05 | 1.300401428 | 2.02657406  |
| PRC1     | 1.346296422 | 1.92E-05 | 1.174676172 | 1.542990399 |
| UTP18    | 1.745615677 | 1.94E-05 | 1.351851376 | 2.254074778 |
| MCM4     | 1.393482221 | 1.96E-05 | 1.196575752 | 1.622791283 |
| GPD2     | 1.6595605   | 1.98E-05 | 1.315025825 | 2.094362712 |
| TPM3     | 1.666203218 | 2.00E-05 | 1.317754462 | 2.106790943 |
| SLC25A19 | 1.612171287 | 2.03E-05 | 1.294262247 | 2.008168178 |
| KIF15    | 1.48193367  | 2.06E-05 | 1.236529535 | 1.776041202 |
| NUP205   | 1.775678256 | 2.09E-05 | 1.363034588 | 2.313245237 |
| MSH2     | 1.58906254  | 2.19E-05 | 1.283130018 | 1.96793756  |
| PPHLN1   | 2.259094042 | 2.25E-05 | 1.549762398 | 3.29308925  |
| LCORL    | 1.915620819 | 2.26E-05 | 1.418183742 | 2.587537155 |
| CENPF    | 1.356136826 | 2.55E-05 | 1.176821428 | 1.562774986 |
| TOP2A    | 1.255894849 | 2.65E-05 | 1.129264163 | 1.39672534  |
| UTP6     | 2.002969995 | 2.66E-05 | 1.448545873 | 2.769597344 |
| POLD1    | 1.616743357 | 2.68E-05 | 1.29200031  | 2.023110258 |
| WDR75    | 1.967310654 | 2.72E-05 | 1.434175462 | 2.698631593 |
| CCT8     | 1.861747135 | 2.76E-05 | 1.39231277  | 2.48945673  |
| DCTN2    | 1.764447033 | 2.76E-05 | 1.35307537  | 2.300886853 |
| PHF19    | 1.47501594  | 2.78E-05 | 1.229848742 | 1.76905659  |
| CDK2     | 1.588905226 | 2.80E-05 | 1.279392355 | 1.973296    |
| LRRC59   | 1.627567098 | 2.84E-05 | 1.295686417 | 2.044456609 |
| GPN1     | 1.940910673 | 2.85E-05 | 1.42274129  | 2.647799897 |
| HSPA14   | 1.887458222 | 2.86E-05 | 1.401669176 | 2.541611532 |
| KIF11    | 1.464057332 | 2.87E-05 | 1.224613853 | 1.750318164 |
| UBE2E1   | 1.83058028  | 2.88E-05 | 1.378906191 | 2.430204595 |
| CLIC1    | 1.340874769 | 2.89E-05 | 1.168652187 | 1.538477544 |
| BRCA1    | 1.52763574  | 2.91E-05 | 1.252401857 | 1.863356351 |
| RAD1     | 1.944012467 | 2.97E-05 | 1.422991164 | 2.655803189 |
| GATC     | 2.22615052  | 2.98E-05 | 1.528992758 | 3.241183525 |
| NAT10    | 2.070415207 | 3.01E-05 | 1.470983154 | 2.914118438 |
| CDC123   | 1.683156172 | 3.07E-05 | 1.317618673 | 2.150102118 |
| NONO     | 1.717970413 | 3.21E-05 | 1.331177053 | 2.217152355 |



|           |             |             |             |             |
|-----------|-------------|-------------|-------------|-------------|
| XRCC2     | 1.554500404 | 3.24E-05    | 1.262526612 | 1.913996491 |
| CHAF1B    | 1.452295465 | 3.38E-05    | 1.217460916 | 1.732426964 |
| RBM14     | 2.172313398 | 3.50E-05    | 1.504374696 | 3.136815256 |
| MPZL1     | 1.464943621 | 3.53E-05    | 1.222502442 | 1.755464642 |
| EEF1E1    | 1.523448168 | 3.60E-05    | 1.247663908 | 1.86019192  |
| MCM8      | 1.5805985   | 3.87E-05    | 1.270937244 | 1.965708086 |
| CDC42     | 1.812379913 | 3.92E-05    | 1.365112213 | 2.406191166 |
| ARHGAP11A | 1.463987098 | 4.09E-05    | 1.220254151 | 1.756403141 |
| VPS26A    | 1.844528544 | 4.44E-05    | 1.374867315 | 2.474628287 |
| UBAP2     | 1.82774215  | 4.49E-05    | 1.368101397 | 2.441808314 |
| SNRPG     | 1.71529401  | 4.57E-05    | 1.323322327 | 2.223368775 |
| BAK1      | 1.401569674 | 4.66E-05    | 1.191364497 | 1.648863597 |
| UHRF1     | 1.318839823 | 4.76E-05    | 1.15417591  | 1.506995998 |
| PSMD2     | 1.695405059 | 4.84E-05    | 1.314255264 | 2.187092868 |
| OIP5      | 1.384339464 | 4.86E-05    | 1.183306622 | 1.619525924 |
| NUP85     | 1.736330808 | 5.00E-05    | 1.329934521 | 2.266912113 |
| LSM12     | 1.896778994 | 5.00E-05    | 1.392067033 | 2.584480823 |
| EIF4A3    | 1.701583657 | 5.03E-05    | 1.315985491 | 2.20016631  |
| CKAP5     | 1.791807688 | 5.06E-05    | 1.351435898 | 2.375676712 |
| SNRPB     | 1.480455391 | 5.12E-05    | 1.224426847 | 1.790019691 |
| PIF1      | 1.524586197 | 5.19E-05    | 1.242940305 | 1.870052056 |
| KHDRBS1   | 1.900187408 | 5.26E-05    | 1.392088649 | 2.593737252 |
| CCDC59    | 2.112271407 | 5.28E-05    | 1.46996986  | 3.035225835 |
| FANCI     | 1.483226954 | 5.51E-05    | 1.224615369 | 1.796451565 |
| RPE       | 1.909017822 | 5.56E-05    | 1.394029536 | 2.614255259 |
| SPATS2    | 1.617022217 | 5.76E-05    | 1.279434382 | 2.043684995 |
| RAE1      | 1.805838408 | 5.78E-05    | 1.353913438 | 2.408612149 |
| UBE2T     | 1.330144465 | 5.81E-05    | 1.157440316 | 1.528618171 |
| DDOST     | 1.591702702 | 5.83E-05    | 1.268925827 | 1.996584384 |
| USP39     | 1.973590581 | 6.29E-05    | 1.414611052 | 2.753449279 |
| PSME3     | 1.678740582 | 6.54E-05    | 1.30176797  | 2.164878845 |
| LARP4B    | 1.778428916 | 6.67E-05    | 1.340112485 | 2.360107412 |
| CNOT6     | 1.817539804 | 6.82E-05    | 1.354501235 | 2.4388689   |
| FANCD2    | 1.52805004  | 6.83E-05    | 1.240233627 | 1.882658939 |
| PRIM2     | 1.74355903  | 6.84E-05    | 1.326152486 | 2.292344301 |
| CCNB2     | 1.316220791 | 6.89E-05    | 1.149652469 | 1.506922497 |
| NUP37     | 1.638198805 | 7.08E-05    | 1.284194853 | 2.089788258 |
| NUP62     | 1.678366361 | 7.09E-05    | 1.300034756 | 2.166798718 |
| ANAPC7    | 1.813203219 | 7.22E-05    | 1.351516417 | 2.432605235 |
| GTF3C2    | 1.820618479 | 7.75E-05    | 1.352599952 | 2.450577971 |
| CPSF6     | 1.773807881 | 8.02E-05    | 1.334152844 | 2.358346282 |
| ACTL6A    | 1.606764502 | 8.14E-05    | 1.269138517 | 2.034208347 |
| CDC7      | 1.450764067 | 8.22E-05    | 1.205501005 | 1.745926689 |
| CENPK     | 1.453196326 | 8.37E-05    | 1.206267095 | 1.750673271 |
| RBL1      | 1.709015387 | 8.45E-05    | 1.308304662 | 2.232456765 |
| RBBP4     | 1.64388928  | 8.71E-05    | 1.282469307 | 2.107163074 |
| IARS      | 1.586607174 | 9.04E-05    | 1.25923609  | 1.999086861 |
| ZNF207    | 1.925320275 | 9.21E-05    | 1.386469728 | 2.673594733 |
| NUP43     | 1.785052695 | 9.57E-05    | 1.33421362  | 2.388233097 |
| TRIM28    | 1.53192856  | 0.000102805 | 1.235263169 | 1.899842212 |
| XPO5      | 1.651378483 | 0.000103208 | 1.281991908 | 2.12719821  |

|         |             |             |             |             |
|---------|-------------|-------------|-------------|-------------|
| MMS22L  | 1.969953002 | 0.000103934 | 1.398812645 | 2.774292071 |
| PHF5A   | 1.765477707 | 0.000107641 | 1.324114397 | 2.353959402 |
| C5orf34 | 1.662898953 | 0.00010873  | 1.285331165 | 2.151377793 |
| RPN2    | 1.601111184 | 0.000110215 | 1.261275154 | 2.032512109 |
| FOXJ3   | 1.8292112   | 0.000110649 | 1.346795576 | 2.484425754 |
| C4orf46 | 1.798434208 | 0.000110865 | 1.335526481 | 2.421790693 |
| MTBP    | 1.797753218 | 0.000111645 | 1.33510134  | 2.420727579 |
| MCM7    | 1.383424182 | 0.00011199  | 1.173382417 | 1.631064553 |
| FOXK2   | 1.644286901 | 0.000113336 | 1.277365921 | 2.116605247 |
| ARPC2   | 1.58612348  | 0.000117641 | 1.254224783 | 2.005850729 |
| SMARCD1 | 1.649946908 | 0.000124103 | 1.277645243 | 2.130736067 |
| WDR62   | 1.497196956 | 0.000127971 | 1.217837831 | 1.84063811  |
| SNRPA1  | 1.590732504 | 0.000129344 | 1.254209217 | 2.017550075 |
| HNRNPA3 | 1.787356995 | 0.000130231 | 1.32742659  | 2.406645347 |
| DCLRE1B | 1.791362682 | 0.000130602 | 1.328804009 | 2.414938725 |
| SAE1    | 1.514253865 | 0.000130907 | 1.224213441 | 1.873010613 |
| PSMD9   | 1.88247636  | 0.000131118 | 1.361230651 | 2.603318728 |
| DDX11   | 1.450191193 | 0.00013263  | 1.198489578 | 1.754754096 |
| PRPF38A | 1.863268596 | 0.00013501  | 1.353625654 | 2.564793191 |
| RMI2    | 1.285910064 | 0.000138023 | 1.129938037 | 1.463411832 |
| PDIA6   | 1.499262881 | 0.000142447 | 1.216903308 | 1.847138692 |
| INCENP  | 1.536044335 | 0.000143378 | 1.231169184 | 1.9164159   |
| KPNB1   | 1.634389398 | 0.000144125 | 1.268642877 | 2.105579713 |
| SASS6   | 1.765555596 | 0.000145364 | 1.316760165 | 2.367315358 |
| DTL     | 1.321427689 | 0.00014922  | 1.144157816 | 1.526162835 |
| TARDBP  | 1.715768749 | 0.000149996 | 1.2979111   | 2.268154113 |
| COMMD2  | 1.759879427 | 0.000153281 | 1.3133765   | 2.358178024 |
| RCC2    | 1.408202645 | 0.000153757 | 1.179454449 | 1.681315197 |
| MTA3    | 1.696349431 | 0.000158354 | 1.289536408 | 2.231500697 |
| MZT1    | 1.558383079 | 0.000159594 | 1.237814807 | 1.961971861 |
| ILF2    | 1.54689612  | 0.000165619 | 1.23273318  | 1.941123713 |
| ACYP1   | 1.521800023 | 0.000169244 | 1.222715876 | 1.894042072 |
| H2AFY   | 1.6112851   | 0.0001703   | 1.256504179 | 2.066240381 |
| HAUS1   | 1.585676883 | 0.000175339 | 1.246322571 | 2.017432112 |
| NUP93   | 1.657168582 | 0.000177053 | 1.272634403 | 2.157892088 |
| KIF14   | 1.498832089 | 0.000177576 | 1.21302213  | 1.851984043 |
| AACS    | 1.472922253 | 0.000178681 | 1.202868982 | 1.803604546 |
| CEP85   | 1.58059694  | 0.000190411 | 1.24276259  | 2.010268662 |
| RPAP3   | 2.071335989 | 0.000192441 | 1.412594325 | 3.037271709 |
| DDX55   | 1.827941256 | 0.000200024 | 1.330160403 | 2.512004738 |
| PKMYT1  | 1.333616702 | 0.000200067 | 1.145873688 | 1.552120034 |
| CKAP4   | 1.347535053 | 0.000208018 | 1.151033608 | 1.577582709 |
| MAPRE1  | 1.446955317 | 0.00021304  | 1.189949086 | 1.759469977 |
| EIF2B1  | 2.009815416 | 0.000228105 | 1.386576273 | 2.913188468 |
| TAF1B   | 1.818440343 | 0.000236231 | 1.322090153 | 2.501134491 |
| DBF4B   | 1.689047874 | 0.000251319 | 1.275756934 | 2.236227485 |
| RRM1    | 1.480754035 | 0.000254512 | 1.199857662 | 1.827410519 |
| UTP20   | 1.867969107 | 0.000259625 | 1.335836347 | 2.612077888 |
| HNRNPL  | 1.943808536 | 0.000263535 | 1.360190137 | 2.777840774 |
| CBX1    | 1.480904983 | 0.0002662   | 1.199116537 | 1.828912787 |
| NEDD1   | 1.723923323 | 0.000269202 | 1.2861114   | 2.310773098 |

|          |             |             |             |             |
|----------|-------------|-------------|-------------|-------------|
| RNF34    | 1.710607804 | 0.000272004 | 1.281241161 | 2.283862825 |
| CENPQ    | 1.503881012 | 0.00027787  | 1.206879818 | 1.873971264 |
| SLBP     | 1.600636624 | 0.000284097 | 1.241564396 | 2.063555956 |
| CSNK1D   | 1.711550559 | 0.000292774 | 1.279624513 | 2.289269458 |
| STIL     | 1.559856764 | 0.000292826 | 1.226277357 | 1.984178466 |
| HSF2     | 1.715860078 | 0.000293771 | 1.281010929 | 2.298322162 |
| UBE2N    | 1.89617446  | 0.000312163 | 1.339063762 | 2.685068243 |
| MCM3     | 1.345258797 | 0.000314061 | 1.144843208 | 1.580759023 |
| YEATS2   | 1.606698796 | 0.000326027 | 1.240565809 | 2.080890026 |
| CCDC43   | 1.680256731 | 0.000338209 | 1.265114783 | 2.231625715 |
| USP1     | 1.520277563 | 0.000352906 | 1.208174132 | 1.91300559  |
| MTCH1    | 1.620527935 | 0.000354012 | 1.243436422 | 2.111978337 |
| PLIN3    | 1.421685217 | 0.00035643  | 1.171985959 | 1.724584533 |
| ARL6IP6  | 1.579831771 | 0.000360292 | 1.228846592 | 2.031065913 |
| C17orf53 | 1.516402715 | 0.00036714  | 1.205981468 | 1.906726806 |
| DR1      | 1.617294511 | 0.000368389 | 1.24135625  | 2.107083712 |
| PIGS     | 1.432694999 | 0.000370937 | 1.175389041 | 1.746328142 |
| RAB35    | 1.733399176 | 0.000382579 | 1.279586332 | 2.348159424 |
| GLRX3    | 1.614525158 | 0.000390344 | 1.238997098 | 2.103872149 |
| ACTR6    | 1.762510497 | 0.000394796 | 1.288231638 | 2.411401148 |
| SPPL3    | 1.733869579 | 0.000401488 | 1.278346457 | 2.351712794 |
| UBE2Z    | 1.555320663 | 0.000402657 | 1.217773651 | 1.986430206 |
| FUBP1    | 1.517026596 | 0.000403841 | 1.204245478 | 1.911046986 |
| TRA2B    | 1.994401892 | 0.000405639 | 1.360342283 | 2.923998582 |
| C1orf52  | 1.854588988 | 0.000407851 | 1.316791323 | 2.612031424 |
| PLK4     | 1.452680516 | 0.000412521 | 1.180803959 | 1.787155831 |
| HAUS2    | 1.830927482 | 0.000414126 | 1.308777627 | 2.561394216 |
| HNRNPR   | 1.637008783 | 0.000424225 | 1.244569318 | 2.153192849 |
| CASP2    | 1.591242945 | 0.000433706 | 1.228473381 | 2.061138768 |
| VRK1     | 1.535772977 | 0.000436315 | 1.209184727 | 1.950569324 |
| RNPS1    | 1.60413603  | 0.000452134 | 1.231850299 | 2.088932726 |
| QSER1    | 1.754562348 | 0.00047029  | 1.280337994 | 2.404434647 |
| RIT1     | 1.511957353 | 0.000473034 | 1.199146102 | 1.906369068 |
| PDCD10   | 1.617607023 | 0.000485751 | 1.234583504 | 2.119461723 |
| NASP     | 1.462473614 | 0.000493618 | 1.180921707 | 1.811152304 |
| NXT1     | 1.526098685 | 0.000497085 | 1.202974356 | 1.936015662 |
| BARD1    | 1.609287183 | 0.000538822 | 1.229153199 | 2.10698328  |
| HMGB2    | 1.314434967 | 0.00054142  | 1.125811489 | 1.534661263 |
| GRB2     | 1.629628141 | 0.000554144 | 1.235118714 | 2.150147875 |
| ENOPH1   | 1.602627172 | 0.00055892  | 1.226007529 | 2.094941338 |
| RBM12    | 1.738178311 | 0.00056406  | 1.269490457 | 2.379902761 |
| RAD18    | 1.837000755 | 0.0005835   | 1.298957345 | 2.597908073 |
| TUBA1B   | 1.296649216 | 0.000585104 | 1.118179923 | 1.503603448 |
| SRRT     | 1.618858833 | 0.00064612  | 1.227479073 | 2.135029409 |
| CDC27    | 1.686252292 | 0.000651959 | 1.248696879 | 2.277131337 |
| HNRNPU   | 1.723069135 | 0.000683551 | 1.258713641 | 2.358731283 |
| PPP1R8   | 1.792295135 | 0.000710544 | 1.278505089 | 2.512560865 |
| HELLS    | 1.389939978 | 0.000716697 | 1.148558275 | 1.682050606 |
| DDX23    | 1.783395274 | 0.000725535 | 1.275103239 | 2.494306818 |
| ZMYM4    | 1.710069633 | 0.000727271 | 1.252735337 | 2.334362305 |
| PWP1     | 1.90783988  | 0.000730355 | 1.311486363 | 2.77536474  |

|          |             |             |             |             |
|----------|-------------|-------------|-------------|-------------|
| CAND1    | 1.675195755 | 0.000756332 | 1.240752417 | 2.261757285 |
| DDX54    | 1.739898943 | 0.000783045 | 1.259410837 | 2.403701987 |
| U2AF2    | 1.713711352 | 0.000785172 | 1.251393906 | 2.346828271 |
| CAPZA1   | 1.591496774 | 0.00080296  | 1.212827231 | 2.088394716 |
| PCNP     | 1.703083067 | 0.000838167 | 1.246056929 | 2.327736288 |
| C1orf109 | 1.785137987 | 0.000872035 | 1.269090124 | 2.511025477 |
| LSM2     | 1.408904332 | 0.000924962 | 1.150238225 | 1.725739395 |
| NUP188   | 1.585824868 | 0.000954435 | 1.206280871 | 2.084788519 |
| NUSAP1   | 1.255672629 | 0.00099075  | 1.096550344 | 1.437885419 |
| TTF2     | 1.586279723 | 0.001011542 | 1.204782407 | 2.088579102 |
| TOPBP1   | 1.52161607  | 0.001011718 | 1.184701292 | 1.954345353 |
| AEBP2    | 1.760057073 | 0.001013648 | 1.256353363 | 2.465708288 |
| ZMYM1    | 1.709336023 | 0.001031587 | 1.241012993 | 2.354390854 |
| KNTC1    | 1.372626047 | 0.00103167  | 1.136060849 | 1.658451892 |
| GTF2H3   | 1.547436761 | 0.00105348  | 1.191697023 | 2.009370237 |
| UBA2     | 1.535664152 | 0.001063235 | 1.187804318 | 1.98539806  |
| RBBP7    | 1.566265144 | 0.001182886 | 1.194246881 | 2.054170325 |
| SPIN4    | 1.518247708 | 0.001219694 | 1.178821323 | 1.955407541 |
| SMC4     | 1.334611518 | 0.001226313 | 1.12034761  | 1.589852905 |
| PRMT3    | 1.686399667 | 0.001257176 | 1.227586684 | 2.316694921 |
| GTF3C3   | 1.86527727  | 0.001328043 | 1.274749865 | 2.729366278 |
| RRP36    | 1.544258596 | 0.001379785 | 1.183285278 | 2.015350531 |
| HAUS6    | 1.60545771  | 0.001384974 | 1.201112909 | 2.145921869 |
| ANKLE2   | 1.576524889 | 0.001451462 | 1.191272454 | 2.086366319 |
| ATAD5    | 1.632952136 | 0.001477298 | 1.20690286  | 2.209401241 |
| DCK      | 1.417759119 | 0.001482162 | 1.143166212 | 1.758310296 |
| PRKAG1   | 1.811720574 | 0.001486794 | 1.255686746 | 2.613973149 |
| ZNF131   | 1.682553746 | 0.00151036  | 1.220039701 | 2.320405725 |
| RAD51D   | 1.729042299 | 0.001575667 | 1.231192899 | 2.428203798 |
| SENP1    | 1.79508646  | 0.001644455 | 1.247054579 | 2.583956994 |
| ZNF639   | 1.785048741 | 0.00167065  | 1.243758369 | 2.561911613 |
| DNMT1    | 1.375530958 | 0.00169706  | 1.1272029   | 1.678566846 |
| SF3B2    | 1.760069799 | 0.001723766 | 1.235901778 | 2.50654684  |
| SMNDC1   | 1.699606992 | 0.001735737 | 1.219559715 | 2.368612123 |
| C12orf49 | 1.321169305 | 0.001762288 | 1.109578991 | 1.573108671 |
| CENPJ    | 1.608217794 | 0.001765528 | 1.194025934 | 2.16608735  |
| DDX52    | 1.691004175 | 0.001777111 | 1.216359864 | 2.35086277  |
| FANCG    | 1.418897894 | 0.001835129 | 1.138582418 | 1.768226175 |
| RIOK1    | 1.523917981 | 0.001902179 | 1.168085375 | 1.988147496 |
| PTPDC1   | 1.626057308 | 0.001902963 | 1.196354162 | 2.210100031 |
| XRCC3    | 1.55460382  | 0.001918665 | 1.176435403 | 2.054335523 |
| TLK2     | 1.809425449 | 0.001980899 | 1.242645591 | 2.634717797 |
| FBXO30   | 1.669219072 | 0.001981287 | 1.206459466 | 2.309478593 |
| DDX50    | 1.638612363 | 0.001985362 | 1.198234226 | 2.24083941  |
| POU2F1   | 1.900770697 | 0.001985728 | 1.26514883  | 2.855734562 |
| RCN2     | 1.371462873 | 0.001989976 | 1.122581182 | 1.675522841 |
| TRIM59   | 1.542969278 | 0.001993007 | 1.172014103 | 2.031335789 |
| SUPT7L   | 1.715658927 | 0.001995482 | 1.218362808 | 2.415935167 |
| HNRNPK   | 1.822565995 | 0.001997051 | 1.245574439 | 2.666839255 |
| MTF2     | 1.583894057 | 0.002011277 | 1.182993489 | 2.120654431 |
| CD2AP    | 1.435250443 | 0.002097259 | 1.140092049 | 1.806822384 |

|         |             |             |             |             |
|---------|-------------|-------------|-------------|-------------|
| POGK    | 1.414043738 | 0.002138288 | 1.13347954  | 1.764054509 |
| NIF3L1  | 1.667365419 | 0.002146277 | 1.202940706 | 2.311092665 |
| SCMH1   | 1.437229582 | 0.002156315 | 1.139950153 | 1.812034382 |
| PTBP1   | 1.685567093 | 0.002183962 | 1.206986632 | 2.353908777 |
| UBE2I   | 1.497612346 | 0.002294769 | 1.155194206 | 1.94152873  |
| RBMX    | 1.584227889 | 0.0023161   | 1.178311967 | 2.129977524 |
| STX6    | 1.476460221 | 0.002357752 | 1.148568735 | 1.897957621 |
| METAP2  | 1.652348271 | 0.002380513 | 1.195086902 | 2.28456592  |
| R3HDM1  | 1.710383278 | 0.002400361 | 1.209471903 | 2.418750655 |
| MYO19   | 1.437904915 | 0.002488834 | 1.136378593 | 1.819438134 |
| RLF     | 1.600480578 | 0.00250877  | 1.179758321 | 2.17123968  |
| DNM1L   | 1.526712087 | 0.00256467  | 1.159647317 | 2.009964375 |
| METTL9  | 1.409403699 | 0.002601263 | 1.127283049 | 1.762129563 |
| ARF3    | 1.479360265 | 0.002738488 | 1.144985931 | 1.911383131 |
| RNF138  | 1.591209244 | 0.002763537 | 1.17387336  | 2.156916534 |
| ETNK1   | 1.494355476 | 0.002772253 | 1.148607917 | 1.94417804  |
| EXOSC3  | 1.57616851  | 0.002802784 | 1.16952969  | 2.124193336 |
| PMS1    | 1.819256868 | 0.002831556 | 1.228209799 | 2.694731435 |
| DUSP12  | 1.500067606 | 0.002859118 | 1.149154622 | 1.958137557 |
| PRMT1   | 1.392462174 | 0.002912439 | 1.119735744 | 1.731614728 |
| KPNA6   | 1.627095358 | 0.002985551 | 1.179941984 | 2.243702944 |
| G2E3    | 1.770395861 | 0.002998884 | 1.214074054 | 2.581639477 |
| PNRC2   | 1.552815199 | 0.00303694  | 1.160752122 | 2.077304016 |
| UBAP2L  | 1.417079809 | 0.003129336 | 1.124527498 | 1.785741291 |
| ABI2    | 1.472278884 | 0.003137842 | 1.139005438 | 1.903068273 |
| DROSHA  | 1.506663701 | 0.003224454 | 1.146996466 | 1.979112906 |
| NAA40   | 1.444788616 | 0.003228063 | 1.13098298  | 1.845663623 |
| ACLY    | 1.374889603 | 0.003268398 | 1.112068784 | 1.69982419  |
| MITD1   | 1.557063909 | 0.003342642 | 1.158395755 | 2.092935861 |
| TDG     | 1.507329532 | 0.003351581 | 1.145887245 | 1.982780007 |
| SUPT16H | 1.524726078 | 0.00342669  | 1.149496844 | 2.022441058 |
| PRKCI   | 1.43150385  | 0.003429369 | 1.125768774 | 1.82027013  |
| TOP1    | 1.554129791 | 0.003430724 | 1.156729243 | 2.088059431 |
| MEX3C   | 1.516759205 | 0.003432799 | 1.1474489   | 2.00493328  |
| ZBTB40  | 1.6004713   | 0.003439275 | 1.167909582 | 2.193242031 |
| CCDC93  | 1.518009509 | 0.003488817 | 1.147207635 | 2.008662425 |
| CCAR1   | 1.586857734 | 0.003521631 | 1.16371188  | 2.163866771 |
| VEZF1   | 1.464277197 | 0.00365433  | 1.13224206  | 1.893683148 |
| MIS18A  | 1.393823123 | 0.003759623 | 1.113438251 | 1.744814224 |
| MTPAP   | 1.768590451 | 0.003781356 | 1.202343357 | 2.601513258 |
| SMPD4   | 1.584343212 | 0.003800586 | 1.160147304 | 2.163641983 |
| ARL1    | 1.589938652 | 0.003821958 | 1.161246334 | 2.176889469 |
| UIMC1   | 1.706886978 | 0.003887224 | 1.187331373 | 2.4537911   |
| IFT52   | 1.4211476   | 0.00389311  | 1.119444537 | 1.804163078 |
| SUZ12   | 1.448820257 | 0.003895562 | 1.126377203 | 1.863567667 |
| STK4    | 1.564180197 | 0.004026826 | 1.153147313 | 2.121723444 |
| UBE2O   | 1.543808076 | 0.004054387 | 1.148087459 | 2.075924928 |
| IQCB1   | 1.533114833 | 0.004091794 | 1.145215174 | 2.052401282 |
| XPO1    | 1.528383626 | 0.004179371 | 1.143317657 | 2.043138661 |
| MRPL42  | 1.746481096 | 0.004192114 | 1.192344008 | 2.55815117  |
| DCAF7   | 1.419060196 | 0.004210316 | 1.116620601 | 1.803416344 |

|         |             |             |             |             |
|---------|-------------|-------------|-------------|-------------|
| USP48   | 1.637758008 | 0.004339644 | 1.166891498 | 2.298629563 |
| PSPC1   | 1.556344171 | 0.00436662  | 1.148183245 | 2.109599831 |
| CBFB    | 1.404383446 | 0.004422822 | 1.111546258 | 1.774368678 |
| DHX9    | 1.449926103 | 0.004430684 | 1.12259102  | 1.872708463 |
| DNAJC10 | 1.424651793 | 0.004475878 | 1.116153571 | 1.818417091 |
| HNRNPC  | 1.647697483 | 0.00459813  | 1.166495158 | 2.327405286 |
| CWC22   | 1.64373195  | 0.004644885 | 1.165170935 | 2.318848369 |
| HCFC1   | 1.527443778 | 0.004737779 | 1.138418094 | 2.049409182 |
| KIF20B  | 1.497424204 | 0.004796519 | 1.131079386 | 1.982424287 |
| THOC1   | 1.528900447 | 0.004804119 | 1.138219838 | 2.053677593 |
| YEATS4  | 1.414503741 | 0.004834215 | 1.111352972 | 1.800346859 |
| ADAM17  | 1.414154303 | 0.004883485 | 1.110959419 | 1.800094906 |
| NCOA5   | 1.527483811 | 0.004894756 | 1.137183555 | 2.051741588 |
| RAB5C   | 1.480120524 | 0.004918738 | 1.126193497 | 1.94527563  |
| DHX15   | 1.471727723 | 0.004920165 | 1.1242442   | 1.92661211  |
| NCBP1   | 1.675289492 | 0.004973536 | 1.168740525 | 2.401384072 |
| RFC5    | 1.414421542 | 0.005091593 | 1.109736933 | 1.802759049 |
| RWD3    | 1.491271067 | 0.005108094 | 1.127392518 | 1.972595488 |
| M6PR    | 1.345984958 | 0.005118346 | 1.093194039 | 1.657231419 |
| BUB3    | 1.562312119 | 0.005303253 | 1.141693792 | 2.137892992 |
| NOL7    | 1.434399599 | 0.00541545  | 1.11240432  | 1.849599262 |
| ANKRD52 | 1.424419033 | 0.005518944 | 1.109499892 | 1.828724451 |
| S100PBP | 1.557787463 | 0.005534221 | 1.138938885 | 2.130669005 |
| VHL     | 1.417763689 | 0.005658878 | 1.107170084 | 1.815487888 |
| TCF3    | 1.349776829 | 0.00592276  | 1.09016141  | 1.671218107 |
| LIN9    | 1.460643923 | 0.006152563 | 1.113841517 | 1.915425702 |
| BCOR    | 1.425763716 | 0.006216432 | 1.10585855  | 1.838211744 |
| NDE1    | 1.419963309 | 0.006377513 | 1.103723509 | 1.826812408 |
| POLD3   | 1.440060805 | 0.006477942 | 1.107548187 | 1.872401713 |
| ANKRD27 | 1.386858216 | 0.006534815 | 1.095657187 | 1.755453928 |
| POLG2   | 1.428403685 | 0.006708188 | 1.103820726 | 1.848431579 |
| PRPF40A | 1.559203912 | 0.006833556 | 1.13011663  | 2.151208798 |
| PGAM1   | 1.36983724  | 0.006951272 | 1.090005592 | 1.72150866  |
| NAA25   | 1.684153349 | 0.007047044 | 1.152709362 | 2.460613748 |
| PHF6    | 1.477838475 | 0.007181935 | 1.111619552 | 1.964706859 |
| SART3   | 1.578920847 | 0.007280865 | 1.131082919 | 2.204074519 |
| TBP     | 1.585932669 | 0.007290437 | 1.132372907 | 2.221160904 |
| EWSR1   | 1.630943582 | 0.007385866 | 1.14028584  | 2.332728227 |
| SUMO2   | 1.431092234 | 0.007456628 | 1.100630763 | 1.860773886 |
| MTA2    | 1.511768233 | 0.007494758 | 1.116680318 | 2.046640522 |
| STX12   | 1.56842078  | 0.007654755 | 1.126715905 | 2.183286604 |
| FAM104A | 1.557850226 | 0.007718833 | 1.124312496 | 2.158561198 |
| HNRNPH3 | 1.532572113 | 0.007777401 | 1.119125475 | 2.09876134  |
| CREB1   | 1.647867629 | 0.00843197  | 1.136387036 | 2.389562389 |
| NRM     | 1.218070638 | 0.00846494  | 1.051714259 | 1.410740671 |
| NPEPPS  | 1.358965932 | 0.008477046 | 1.081507749 | 1.707605338 |
| E2F3    | 1.339950279 | 0.008602706 | 1.077174557 | 1.666829891 |
| HEATR6  | 1.482533074 | 0.009050295 | 1.103054478 | 1.992561892 |
| STRN4   | 1.439525656 | 0.009054419 | 1.094977376 | 1.892490348 |
| CSNK2A1 | 1.420011185 | 0.009093954 | 1.091097307 | 1.848076932 |
| SOCS7   | 1.501510179 | 0.009210964 | 1.105773709 | 2.038873596 |

|           |             |             |             |             |
|-----------|-------------|-------------|-------------|-------------|
| PPP5C     | 1.429352071 | 0.009271569 | 1.092130493 | 1.870698928 |
| COPB1     | 1.449669388 | 0.00929486  | 1.095838653 | 1.91774704  |
| SMARCB1   | 1.353039477 | 0.009412361 | 1.076957751 | 1.699895679 |
| COIL      | 1.525767737 | 0.009738082 | 1.107556649 | 2.101894461 |
| HNRNPD    | 1.501998561 | 0.009951159 | 1.102373827 | 2.046492417 |
| PUM1      | 1.52177829  | 0.010271654 | 1.104326089 | 2.097033826 |
| HACE1     | 1.619300426 | 0.010458135 | 1.119651698 | 2.341919255 |
| HNRNPA2B1 | 1.570251988 | 0.010505585 | 1.11136956  | 2.21860612  |
| RBM8A     | 1.467034005 | 0.010764382 | 1.092760243 | 1.969497688 |
| DCAF16    | 1.34368097  | 0.011213807 | 1.0694002   | 1.688309531 |
| THUMPD2   | 1.52753332  | 0.011494302 | 1.099772447 | 2.121673487 |
| ZNF248    | 1.477784435 | 0.011702572 | 1.09080092  | 2.002058116 |
| ZBTB34    | 1.539043723 | 0.011747635 | 1.100507339 | 2.152330564 |
| OTUD3     | 1.545078659 | 0.011928178 | 1.100667985 | 2.168926593 |
| TMED2     | 1.410426502 | 0.01226017  | 1.077644001 | 1.845974102 |
| DNAJC9    | 1.349978768 | 0.01227033  | 1.067399111 | 1.707367614 |
| ACTR2     | 1.360707542 | 0.012617484 | 1.068216165 | 1.733286833 |
| EHMT2     | 1.300660049 | 0.012875049 | 1.057305918 | 1.600025625 |
| METTL3    | 1.493293727 | 0.013184535 | 1.087544907 | 2.050422138 |
| ILF3      | 1.394520331 | 0.013260209 | 1.071846998 | 1.814332602 |
| TTF1      | 1.562243487 | 0.014096996 | 1.09409377  | 2.230708902 |
| USP24     | 1.564314533 | 0.014757837 | 1.091741107 | 2.241447117 |
| DIABLO    | 1.618231857 | 0.015066787 | 1.097711561 | 2.385575989 |
| DVL3      | 1.374223386 | 0.015237642 | 1.063046352 | 1.776488777 |
| ZBED4     | 1.433234341 | 0.015812576 | 1.069940076 | 1.919883852 |
| SOCS5     | 1.444161971 | 0.015965101 | 1.071003009 | 1.947337011 |
| RNF219    | 1.447629503 | 0.015993976 | 1.071394256 | 1.95598508  |
| MORF4L1   | 1.432773852 | 0.016032706 | 1.069221358 | 1.919940052 |
| PHF21A    | 1.40424295  | 0.016137735 | 1.064934402 | 1.851661716 |
| CHTOP     | 1.467601738 | 0.017052068 | 1.070841217 | 2.011367162 |
| HNRNPA1   | 1.33758416  | 0.017375903 | 1.052531438 | 1.699836528 |
| CDK11B    | 1.464287131 | 0.017611625 | 1.068729331 | 2.006248671 |
| PPP4R1    | 1.400479527 | 0.01798402  | 1.059498284 | 1.851199699 |
| TCERG1    | 1.417871836 | 0.018128357 | 1.061359791 | 1.894136711 |
| TAF4      | 1.472817353 | 0.01827453  | 1.067831837 | 2.03139753  |
| GTPBP2    | 1.268138506 | 0.018312499 | 1.04102171  | 1.544804738 |
| PDCL      | 1.475649728 | 0.018680848 | 1.066981381 | 2.040843596 |
| HMGXB4    | 1.43259494  | 0.018721176 | 1.061621403 | 1.933201662 |
| FRMD8     | 1.323716708 | 0.018950472 | 1.047281211 | 1.67311884  |
| FANCF     | 1.443193089 | 0.019416931 | 1.061032828 | 1.962998917 |
| DEK       | 1.269340425 | 0.019810663 | 1.038595497 | 1.551349992 |
| TUBB      | 1.239326995 | 0.019833215 | 1.034622652 | 1.484532933 |
| EED       | 1.524998037 | 0.019998154 | 1.068724974 | 2.176068745 |
| CHD4      | 1.419191394 | 0.020815279 | 1.054659964 | 1.909719038 |
| PPP6R1    | 1.364259956 | 0.020864562 | 1.048243512 | 1.775546624 |
| BRPF1     | 1.528375922 | 0.021452696 | 1.064710459 | 2.19396075  |
| ZNF765    | 1.613377066 | 0.022080359 | 1.071173906 | 2.430030777 |
| KCTD10    | 1.371285824 | 0.022158982 | 1.046264406 | 1.797274954 |
| DPF2      | 1.461252539 | 0.022883916 | 1.053983035 | 2.025895022 |
| WTAP      | 1.413959733 | 0.02292513  | 1.049092775 | 1.905724807 |
| RIF1      | 1.441999124 | 0.02330163  | 1.051036448 | 1.978391404 |

|          |             |             |             |             |
|----------|-------------|-------------|-------------|-------------|
| PTBP2    | 1.44073222  | 0.023622159 | 1.050144464 | 1.97659408  |
| ARMC8    | 1.592224315 | 0.02365823  | 1.06419673  | 2.382245874 |
| TMEM39A  | 1.429833615 | 0.024086366 | 1.048001239 | 1.950784113 |
| TJAP1    | 1.380684943 | 0.024144347 | 1.043085695 | 1.827549664 |
| HAUS5    | 1.389499768 | 0.024239077 | 1.043754654 | 1.849773411 |
| ZWILCH   | 1.341280306 | 0.024257936 | 1.038931114 | 1.731619004 |
| USP36    | 1.376478877 | 0.024506744 | 1.041931547 | 1.818443933 |
| ZCCHC3   | 1.347046972 | 0.025108438 | 1.03791381  | 1.748252626 |
| APAF1    | 1.411683775 | 0.025837667 | 1.042442068 | 1.911713985 |
| MAZ      | 1.268500021 | 0.025939988 | 1.028939517 | 1.563835655 |
| ADO      | 1.437895251 | 0.025984838 | 1.044426304 | 1.979596591 |
| SP3      | 1.368410569 | 0.026145995 | 1.037943578 | 1.804093714 |
| LUC7L3   | 1.356354291 | 0.026682047 | 1.035861402 | 1.776006867 |
| HNRNPA0  | 1.395680481 | 0.027138772 | 1.03837145  | 1.875941413 |
| CDK2AP1  | 1.27964888  | 0.027284748 | 1.028028313 | 1.592856185 |
| ANAPC5   | 1.469867261 | 0.027450378 | 1.043741043 | 2.06996724  |
| DIP2B    | 1.390592704 | 0.027459449 | 1.037311134 | 1.864192917 |
| CSTF3    | 1.425076962 | 0.027936011 | 1.039134211 | 1.954361935 |
| SBNO1    | 1.501560546 | 0.029461944 | 1.041402621 | 2.165045515 |
| ADNP     | 1.335569693 | 0.029939073 | 1.028513948 | 1.734294812 |
| RNF41    | 1.506698197 | 0.030361628 | 1.039645522 | 2.183570659 |
| MIS18BP1 | 1.354271333 | 0.030378931 | 1.029151862 | 1.782099331 |
| EFCAB7   | 1.498742643 | 0.030446053 | 1.03892986  | 2.162060785 |
| LEMD3    | 1.45272811  | 0.030890143 | 1.034943118 | 2.039164206 |
| HP1BP3   | 1.317251556 | 0.031688669 | 1.024452581 | 1.693735458 |
| RPS6KB1  | 1.428089599 | 0.032507561 | 1.030135463 | 1.979778365 |
| ZNF224   | 0.712662687 | 0.032635928 | 0.522307385 | 0.972393116 |
| PGS1     | 1.376919398 | 0.032793624 | 1.02651298  | 1.846939168 |
| EIF4H    | 1.435937328 | 0.034165187 | 1.027383962 | 2.00695756  |
| CNOT3    | 1.406224992 | 0.034184382 | 1.025746626 | 1.92783352  |
| AZI2     | 1.436591052 | 0.034330787 | 1.027101264 | 2.009338245 |
| SLMAP    | 1.47463412  | 0.035583003 | 1.026533011 | 2.118339853 |
| RYK      | 1.439110456 | 0.03568718  | 1.024650144 | 2.021215648 |
| UBA3     | 1.475398451 | 0.035703663 | 1.026325237 | 2.120965667 |
| ZBTB12   | 1.244815887 | 0.036450834 | 1.013903611 | 1.528317462 |
| FUS      | 1.31803184  | 0.037791175 | 1.015696102 | 1.710361916 |
| HGS      | 1.251134015 | 0.037945828 | 1.012543967 | 1.545944052 |
| HMGB1    | 1.413586385 | 0.03870808  | 1.018130078 | 1.962643586 |
| BAZ2A    | 1.327649134 | 0.03876344  | 1.014743109 | 1.737042813 |
| METTL4   | 1.507836423 | 0.040240759 | 1.018447881 | 2.232387852 |
| PAPOLG   | 1.631932503 | 0.040253735 | 1.022008433 | 2.605852954 |
| EP400    | 1.426767014 | 0.040286927 | 1.015865909 | 2.003870879 |
| ERCC3    | 1.423010419 | 0.0403779   | 1.015591455 | 1.993871299 |
| C18orf25 | 1.510430603 | 0.041048495 | 1.016910544 | 2.243462437 |
| SEN5P    | 1.502562879 | 0.041356099 | 1.016091712 | 2.221940382 |
| RERE     | 1.29339507  | 0.042345136 | 1.008929323 | 1.658065405 |
| ZNF202   | 1.445277742 | 0.042566876 | 1.012421012 | 2.063200711 |
| U2SURP   | 1.360519398 | 0.042710773 | 1.010163492 | 1.832389556 |
| NUP160   | 1.347293563 | 0.043560417 | 1.008652765 | 1.799628186 |
| SUDS3    | 1.399929991 | 0.044625487 | 1.008108096 | 1.944041505 |
| PDE7A    | 1.247223289 | 0.044811342 | 1.005128326 | 1.547629186 |



|         |             |             |             |             |
|---------|-------------|-------------|-------------|-------------|
| ZNF26   | 1.393741087 | 0.044908672 | 1.007567988 | 1.927923716 |
| CDK11A  | 1.383652563 | 0.04492318  | 1.007380116 | 1.900468735 |
| RUNDC1  | 1.360053229 | 0.045200981 | 1.00659589  | 1.837624021 |
| PHACTR4 | 1.35835722  | 0.047776327 | 1.003004603 | 1.839607048 |
| SCLT1   | 1.549485592 | 0.048537512 | 1.002816234 | 2.394163076 |
| TBK1    | 1.455753193 | 0.049901345 | 1.000161785 | 2.118874557 |

**Table S7.** Importance of SRSF-related genes when OBB error rate reached lowest.

| Signature | Importance  |
|-----------|-------------|
| UTP6      | 0.699528597 |
| SOCS7     | 0.563189568 |
| PGAM5     | 0.548090708 |
| CCDC59    | 0.478713426 |
| SF3B2     | 0.47092414  |
| PGAM1     | 0.457258419 |
| TUBA1C    | 0.456262637 |
| LLPH      | 0.455818072 |
| NUP43     | 0.441228558 |
| FAM72A    | 0.438426616 |
| PRMT1     | 0.437179298 |
| MAPRE1    | 0.434113355 |
| ANKRD27   | 0.422022243 |
| PLIN3     | 0.417791508 |
| WDR75     | 0.41551843  |
| DDX54     | 0.411236857 |
| CORO1C    | 0.3954568   |
| DDX11     | 0.395314381 |
| GTPBP4    | 0.384773425 |
| SNRNPB2   | 0.373684259 |
| ETNK1     | 0.372485793 |
| PSMD9     | 0.371797822 |
| QSER1     | 0.37080448  |
| CCDC93    | 0.365922823 |
| GRPEL2    | 0.364913119 |
| XPO5      | 0.359760311 |
| NAA25     | 0.356107581 |
| ZNF131    | 0.355668566 |
| FOXK2     | 0.355208033 |
| NIF3L1    | 0.354090849 |
| MIS18A    | 0.352835699 |
| NAP1L1    | 0.352639988 |
| PPP5C     | 0.351610152 |
| GTF3C2    | 0.351502379 |

**Table S8.** Coefficients of members involved in SRSF-related signature.

| id     | coef         | exp(coef)   | se(coef)    | z            | Pr(> z )    |
|--------|--------------|-------------|-------------|--------------|-------------|
| SRSF1  | -2.353467349 | 0.095039057 | 0.516754866 | -4.554320638 | 5.26E-06    |
| SRSF2  | 0.948122406  | 2.580859301 | 0.424673535 | 2.232591221  | 0.025575914 |
| SRSF11 | -0.439922027 | 0.64408664  | 0.290621643 | -1.513727685 | 0.13009492  |
| WDR75  | 0.758899371  | 2.135924067 | 0.383289155 | 1.979965674  | 0.047707386 |

---

|         |              |             |             |              |             |
|---------|--------------|-------------|-------------|--------------|-------------|
| TUBA1C  | 0.429508257  | 1.536501774 | 0.160957461 | 2.668458206  | 0.007620026 |
| SNRPB2  | 0.381780958  | 1.464891177 | 0.259623162 | 1.470519638  | 0.141421071 |
| PGAM5   | 0.431431385  | 1.539459507 | 0.273125994 | 1.57960573   | 0.114197186 |
| NUP43   | 0.527707751  | 1.695042393 | 0.268794843 | 1.963236146  | 0.049618741 |
| NAA25   | −0.936032758 | 0.392180629 | 0.537500338 | −1.741455199 | 0.08160382  |
| MIS18A  | −0.563503149 | 0.569211535 | 0.218822983 | −2.575155224 | 0.010019511 |
| MAPRE1  | −0.428468931 | 0.651505832 | 0.241418531 | −1.774797192 | 0.07593138  |
| GTPBP4  | 0.502819434  | 1.65337629  | 0.267823703 | 1.877426936  | 0.060459603 |
| GTF3C2  | 0.555001875  | 1.741944251 | 0.336659238 | 1.648556798  | 0.099238466 |
| GRPEL2  | 1.095717432  | 2.991327987 | 0.272274147 | 4.024316829  | 5.71E-05    |
| FAM72A  | 0.840040439  | 2.31646065  | 0.261605707 | 3.21109371   | 0.001322308 |
| ETNK1   | 0.554378653  | 1.740858972 | 0.260563533 | 2.127614125  | 0.03336909  |
| DDX54   | −0.551057921 | 0.576339766 | 0.331388832 | −1.662874147 | 0.096337631 |
| ANKRD27 | −0.338259333 | 0.713010357 | 0.230986109 | −1.464414174 | 0.143080818 |

---
